# Supplementary material for: Predicting electronic structure properties of transition metal complexes with neural networks
Source: PubMed Central journal article supplement (PMC6100542; doi:10.1039/c7sc01247k), 2017-05-17
Supplement: SC-008-C7SC01247K-s003.pdf [file SC-008-C7SC01247K-s003.pdf]

# Supporting Information for Predicting Electronic Structure Properties of Transition Metal Complexes with Neural Networks

Jon Paul Janet<sup>1</sup> and Heather Kulik <sup>\*1</sup>

<sup>1</sup> Department of Chemical Engineering, Massachusetts Institute of Technology, Cambridge, MA, USA

## Contents:

|            |                                                                              |     |
|------------|------------------------------------------------------------------------------|-----|
| Text S1:   | Supporting files index . . . . .                                             | S3  |
| Text S2:   | Estimation of $\tau$ . . . . .                                               | S4  |
| Text S3:   | Use of Coulomb matrix fdescriptor . . . . .                                  | S4  |
| Text S4:   | Testing ANN performance in molSimplify . . . . .                             | S5  |
| Text S5:   | Molecular descriptors for CSD compounds . . . . .                            | S5  |
| Text S6:   | Dissimilarity metrics for LS/HS bond length prediction . . . . .             | S5  |
| Table S1:  | Ligand properties . . . . .                                                  | S6  |
| Table S2:  | Core homoleptic ligands . . . . .                                            | S6  |
| Table S3:  | CSD structure references . . . . .                                           | S7  |
| Table S4:  | Relaxed tolerances for some CSD cases . . . . .                              | S8  |
| Table S5:  | Excluded structures: spin contamination . . . . .                            | S8  |
| Table S6:  | Excluded structures: geometric brekaup . . . . .                             | S8  |
| Table S7:  | Variable scaling constants . . . . .                                         | S8  |
| Table S8:  | Variable Selection for splitting energy: set a . . . . .                     | S9  |
| Table S9:  | Variable Selection for splitting energy: set b . . . . .                     | S10 |
| Table S10: | Variable Selection for splitting energy: set c . . . . .                     | S11 |
| Table S11: | Variable Selection for splitting energy: set d . . . . .                     | S12 |
| Table S12: | Variable Selection for splitting energy: set e . . . . .                     | S13 |
| Table S13: | Variable selection for splitting energy: set f . . . . .                     | S14 |
| Table S14: | Variable selection for splitting energy: set g . . . . .                     | S15 |
| Table S15: | Variable selection for HF slope: set a . . . . .                             | S16 |
| Table S16: | Variable selection for HF slope: set b . . . . .                             | S17 |
| Table S17: | Variable selection for HF slope: set c . . . . .                             | S18 |
| Table S18: | Variable selection for HF slope: set d . . . . .                             | S19 |
| Table S19: | Variable selection for HF slope: set e . . . . .                             | S20 |
| Table S20: | Variable selection for HF slope: set f . . . . .                             | S21 |
| Table S21: | Variable selection for HF slope: set g . . . . .                             | S22 |
| Figure S1: | Variable selection plots . . . . .                                           | S23 |
| Table S22: | Hyperparameters for different KRR and SVR models . . . . .                   | S23 |
| Figure S2: | Binary ground state classification tree for heteroleptic compounds . . . . . | S24 |
| Figure S3: | Splitting energy prediction: Mn . . . . .                                    | S25 |
| Figure S4: | Splitting energy prediction: Co . . . . .                                    | S26 |
| Figure S5: | Splitting energy prediction: Cr . . . . .                                    | S27 |

\*Corresponding Author

|                                                                                            |     |
|--------------------------------------------------------------------------------------------|-----|
| Figure S6: Splitting energy prediction: Fe(II) and Ni(II)                                  | S28 |
| Table S23: Splitting energy predictions and data compared                                  | S29 |
| Figure S7: Splitting energy prediction: comparison of uncertainty                          | S34 |
| Figure S8: Test set error histogram for different machine learning models                  | S34 |
| Table S24: RMS prediction errors for splitting energy                                      | S35 |
| Table S25: Average HF exchange sensitivity by metal and ligand connection atom             | S35 |
| Figure S9: Scatter plot of HFX sensitivity                                                 | S36 |
| Figure S10: HF slope prediction: error boxplot                                             | S36 |
| Figure S11: HF slope prediction: Co                                                        | S37 |
| Figure S12: HF slope prediction: Cr                                                        | S38 |
| Figure S13: HF slope prediction: Fe(II) and Ni(II)                                         | S39 |
| Figure S14: HF slope prediction: Mn                                                        | S40 |
| Table S26: HFX sensitivity predictions and data compared                                   | S41 |
| Figure S15: HF slope prediction: comparison of uncertainty                                 | S45 |
| Figure S16: Bond distance prediction: LS error boxplot                                     | S46 |
| Figure S17: Bond distance prediction: comparison of LS uncertainty                         | S46 |
| Figure S18: Bond distance prediction: LS Co                                                | S47 |
| Figure S19: Bond distance prediction: LS Cr                                                | S48 |
| Figure S20: Bond distance prediction: LS Fe(II) and Ni(II)                                 | S49 |
| Figure S21: Bond distance prediction: LS Mn                                                | S50 |
| Table S27: LS bond distance predictions and data compared                                  | S51 |
| Figure S22: Bond distance prediction: HS error boxplot                                     | S56 |
| Figure S23: Bond distance prediction: comparison of HF uncertainty                         | S56 |
| Figure S24: Bond distance prediction: HS Co                                                | S57 |
| Figure S25: Bond distance prediction: HS Cr                                                | S58 |
| Figure S26: Bond distance prediction: HS Fe(II), Fe(III) and Ni(II)                        | S59 |
| Figure S27: Bond distance prediction: HS Mn                                                | S60 |
| Table S28: HS bond distance predictions and data compared                                  | S61 |
| Table S29: Error breakdown for bond distance predictions                                   | S66 |
| Table S30: molSimplify gradients for ANN assisted structure design                         | S66 |
| Figure S28: Metal-ligand gradient bond projection                                          | S66 |
| Table S31: CSD split energy prediction                                                     | S67 |
| Figure S29: CSD splitting energy errors and dissimilarity: Tanimoto/FP2                    | S68 |
| Figure S30: CSD splitting energy errors and dissimilarity: Euclidean and Pearson distances | S68 |
| Table S32: LS CSD geometry prediction                                                      | S69 |
| Table S33: HS CSD geometry prediction                                                      | S70 |
| Figure S31: CSD LS geometry errors and dissimilarity comparison                            | S71 |
| Figure S32: CSD HS geometry errors and dissimilarity comparison                            | S71 |
| Figure S33: Comparison of measured CSD bond distances and DFT predicted spin states        | S72 |
| Figure S34: Comparison of HFX interpolation and direct prediction                          | S72 |
| Table S34: CSD splitting interpolation                                                     | S73 |

## Text S1: supporting files index

In addition to results reported here, additional files are provided as follows:

provided files:

- ├─ **geometries.zip**
  - ├─ **csd\_optimized\_geos**
    - └─ *test\_[test number]\_[% HFX]\_[HS/LS].xyz*
  - ├─ **optimized\_geos**
    - └─ *ID\_[metal]\_[oxidation]\_[spin]\_[ligands]\_[% HFX].xyz*
- ├─ **data.zip**
  - ├─ **ann\_weights**
    - ├─ **split** (splitting energy)
      - └─ *[name]\_[w/b (weight/bias)]\_[layer number].csv*
    - ├─ **slope** (HFX sensitivity)
      - └─ (same)
    - ├─ **hs** (high-spin bond length)
      - └─ (same)
    - ├─ **ls** (low-spin bond length)
      - └─ (same)
- ├─ **raw\_data**
  - ├─ **split** (splitting energy)
    - ├─ *raw\_data.csv* <descriptors of all data>
    - ├─ *all\_results.csv* <ANN pred. and data for all runs>
    - ├─ *test\_results.csv* <ANN pred. and data for test runs>
  - ├─ **slope** (HFX sensitivity)
    - └─ (same)
  - ├─ **hs** (high-spin bond length)
    - └─ (same)
  - ├─ **ls** (low-spin bond length)
    - └─ (same)
  - ├─ **csd\_metrics** (error and distance metrics for csd)
    - ├─ *error\_comp\_split.csv*
    - ├─ *error\_comp\_ls.csv*
    - ├─ *error\_comp\_hs.csv*

### Text S2: Estimation of $\tau$

We determine a representative value of  $\tau$  by maximizing the log predictive likelihood of the corresponding GP based on the training data, which is a measure of how likely the observed data are under the GP, and is approximated [6] by

$$\log p(\mathbf{y}(\mathbf{x}_n) | \mathbf{x}_n, \mathbf{X}, \mathbf{Y}) \approx \log \left[ \sum_{j=1}^J e^{-\frac{1}{2}\tau \|\tilde{\mathbf{y}}(\mathbf{x}_n) - \tilde{\mathbf{y}}_j(\mathbf{x}_n)\|_2^2} \right] - \log J - \frac{1}{2} \log 2\pi - \frac{1}{2} \log \tau^{-1} \quad (\text{S1})$$

In the application here, we have only scalar output and we use the training data to optimize equation S1 with respect to  $\tau$  numerically. We use  $J = 100$  repeats, as in the network itself. The determined values of  $\tau$ , based on the respective training data, are 0.4 for predicting the splitting energy, 0.07 for predicting the HF exchange sensitivity, and 10000 for the metal-ligand distances respectively. The magnitude of these numbers are close to the training errors observed, with  $\sqrt{0.4^{-1}} \sim 2.5, 0.4^{-1} \sim 1.6, \sqrt{0.007^{-1}} \sim 12, 0.4^{-1} \sim 0.01$ . These numbers represent the estimated inherent variance in the training data that limit of accuracy that could be expected from the trained networks.

### Text S3: Use of Coulomb matrix descriptor

We compare the descriptors proposed in this work to the Coulomb matrix descriptor, which has previously [22, 9] been correlated with various molecular properties for a number of organic molecule data sets. In order to allow comparison of complexes with differing numbers of atoms, we pad all matrices with zeros to a size of  $151 \times 151$ , necessitating  $\mathcal{O}(10^4)$  elements per compound. We sort the rows and columns of the matrices in order to obtain indexing-invariant representations and use KRR with an exponential kernel and the matrix  $L_1$  norm as a distance metric as in Ref [32]. The complexes in our training data range in size from 7 to 151 atoms, but have a mean and median size of 38 and 29 atoms respectively. This large skew toward smaller complexes means that most of the descriptor elements are zero, and this may make learning good model parameters difficult. For example, the  $L_1$  distances between the sorted matrix representations of the small  $\text{Fe(III)(CN)}_6$  complex and two large complexes,  $\text{Fe(III)(tbuc)}_6$  and  $\text{Fe(III)(pisc)}_6$  are very similar (36.85 to 36.88 where the range of distances spans  $\sim 20 - 60$ ), despite pisc being a similar strong C-connecting ligand and tbuc being a much weaker O-connecting ligand. We train and test on the same data as used in the other methods, but because the Coulomb matrix representation does not encode any functional-dependent information, we also provide a comparison against only B3LYP data (as opposed to varying HFX fractions).

#### Text S4: Testing ANN performance in molSimplify

In order to assess if the ANN can assist automated structure design, we used it to predict bond lengths instead of using the metal-ligand bond length database integrated into our structure generation toolbox, molSimplify [13]. We selected four of the original benchmark structures where molSimplify was found not to reduce RMS gradient error relative to simple force fields. Further details about the test cases are in the original paper. We project the negative of the energy gradient on the metal and connection atoms at the initial geometry onto the vector joining them, as explained in Figure S32, and use this as a measure of how close to an equilibrium bond length the initial geometry is. Note that a negative value for  $g$  means the bond would shrink in a steepest descent step, while a positive value means that it would lengthen. Large magnitudes indicate the bonds are far from equilibrium.

We achieve reductions in the absolute magnitude of  $g$  by 54-90% for bidentate cases and 7% for the monodentate case (Table S26). We note that the reductions in the metal-ligand projected gradient do not necessarily correspond to reductions in the RMS gradient, which considers contributions from all atoms. In the  $\text{Cr}(\text{bipy})_3$  case, the RMS gradient is reduced by 30%, but it is unchanged or marginally higher in the other cases. This may be explained by considering the signs of the projected gradient, which show that the ANN universally reduces the metal-ligand bond length relative to original structure. This brings the bidentate ligands closer to the metal center and hence closer to each other, and we observe that the dominant contribution to the RMS gradient is from other atoms in the ligand structure. This could possibly be improved by training a similar ANN on the bite angles.

#### Text S5: Molecular descriptors for CSD compounds

The poor correlation ( $R^2 = 0.1$ ) between the Tanimoto dissimilarity (for CSD and training ligands) and the prediction error can be understood by considering that the molecular fingerprint is insensitive to the arrangement of groups in the ligand, so two ligands might appear similar in the Tanimoto metric because they both contain certain groups, but this does not ensure that the same groups are coordinating to the metal center. The descriptors used in this work strongly suggest that the immediate metal environment determines behavior of the complex, and so this highlights a specific difficulty in translating established ideas from organic molecular similarity analysis to transition metal systems.

#### Text S6: Dissimilarity metrics for LS/HS bond length prediction

Using the same dissimilarity metrics that were employed to evaluate reliability of spin-state splitting, correlations between HS bond distance error and proximity to test data is smaller for both the HS bond distances ( $R^2 = 0.0, 0.1$  and  $0.2$  for the Tanimoto similarity metric, Pearson, and Euclidean distances, respectively) and LS bond distances ( $R^2 = 0$  for all metrics). However, we do observe that four of the five large (i.e.,  $> 0.1 \text{ \AA}$ ) HS bond distance errors have a minimum Euclidean distance greater than 1.0, supporting the use of this heuristic for evaluating prediction reliability. Bond length errors are generally smaller for LS states compared to HS states, with only two cases (tests 26 and 30) greater than  $0.1 \text{ \AA}$ . We observe an overall correlation between the low spin bond distance prediction inaccuracy and poor splitting energy prediction, but bond lengths may still be well-predicted when spin-state splittings are not (e.g.,  $0.006 - -0.03 \text{ \AA}$  errors in LS bond distances for the cyclams).

Table S1: Ligand properties

| Number | ID        | Name                     | Denticity | Charge | Connection | max $\delta\chi$ | Bond Order | Truncated Kier |
|--------|-----------|--------------------------|-----------|--------|------------|------------------|------------|----------------|
| 1      | cl        | chloride                 | 1         | 1-     | Cl         | 0                | 0          | 0              |
| 2      | scn       | thiocyanate              | 1         | 1-     | S          | 0.03             | 2          | 2              |
| 3      | pisc      | t-butylphenyl isocyanide | 1         | 0      | C          | -0.49            | 3          | 2.25           |
| 4      | misc      | Methyl isocyanide        | 1         | 0      | C          | -0.49            | 3          | 2              |
| 5      | cn        | cyanate                  | 1         | 1-     | C          | -0.49            | 3          | 0              |
| 6      | co        | carbonyl                 | 1         | 0      | C          | -0.89            | 3          | 0              |
| 7      | ncs       | isothiocyanate           | 1         | 1-     | N          | 0.49             | 2          | 2              |
| 8      | ammo      | ammonia                  | 1         | 0      | N          | 0.84             | 1          | 0              |
| 9      | bipy      | 2,2-bipyridine           | 2         | 0      | N          | 0.49             | 2          | 4.297          |
| 10     | phen      | phenanthroline           | 2         | 0      | N          | 0.49             | 2          | 3.868          |
| 11     | en        | ethylenediamine          | 2         | 0      | N          | 0.84             | 1          | 3              |
| 12     | porphyrin | porphyrin                | 4         | 2-     | N          | 0.49             | 2          | 6.958          |
| 13     | h2o       | water                    | 1         | 0      | O          | 1.24             | 1          | 0              |
| 14     | acac      | acetylacetonate          | 2         | 0      | O          | 0.89             | 2          | 3.10           |
| 15     | tbuc      | t-butyl catecholate      | 2         | 2-     | O          | 0.89             | 1          | 2.52           |
| 16     | ox        | oxalate                  | 2         | 2-     | O          | 0.89             | 2          | 2.22           |

| Number | ID        | SMILES                                                    |
|--------|-----------|-----------------------------------------------------------|
| 1      | cl        | [Cl-]                                                     |
| 2      | scn       | [S-]C#N                                                   |
| 3      | pisc      | CC(C)(C)C1=CC=C(C=C1)[N+]#[C-]                            |
| 4      | misc      | C[N+]#[C-]                                                |
| 5      | cn        | [C-]#N                                                    |
| 6      | co        | CO                                                        |
| 7      | ncs       | [N-]=C=S                                                  |
| 9      | bipy      | C1ccnc(c1)c2ccccc2                                        |
| 10     | phen      | C1=CC2=CC=C3C=CC=NC3=C2N=C1                               |
| 11     | en        | NCCN                                                      |
| 12     | porphyrin | [NH]1C2=CC3=NC(=CC4=CC=C([NH]4)C=C5C=CC(=N5)C=C1C=C2)C=C3 |
| 13     | h2o       | O                                                         |
| 14     | acac      | CC(=O)CC(=O)C                                             |
| 15     | tbuc      | CC(C)(C)C1=CC(=C([O-])C=C1)[O-]                           |
| 16     | ox        | [O-]C(=O)C([O-])=O                                        |

Table S2: Core homoleptic ligands

| metal              | oxidation | number of converged & included HFX values per ligand |      |       |    |    |    |     |     |     |    | total |
|--------------------|-----------|------------------------------------------------------|------|-------|----|----|----|-----|-----|-----|----|-------|
|                    |           | acac                                                 | bipy | c2h3s | cn | co | en | h2o | ncs | nh3 | ox |       |
| co                 | 2         | 7                                                    | 7    | 7     | 0  | 7  | 7  | 7   | 7   | 7   | 7  | 63    |
| co                 | 3         | 7                                                    | 7    | 7     | 7  | 7  | 7  | 7   | 7   | 7   | 7  | 70    |
| fe                 | 2         | 7                                                    | 0    | 7     | 7  | 7  | 7  | 7   | 7   | 7   | 7  | 63    |
| fe                 | 3         | 7                                                    | 7    | 7     | 7  | 7  | 7  | 7   | 7   | 7   | 7  | 70    |
| mn                 | 2         | 7                                                    | 7    | 7     | 0  | 7  | 7  | 7   | 7   | 7   | 5  | 61    |
| mn                 | 3         | 7                                                    | 7    | 7     | 7  | 7  | 7  | 7   | 0   | 7   | 7  | 63    |
| cr                 | 2         | 7                                                    | 7    | 7     | 0  | 7  | 7  | 7   | 0   | 7   | 7  | 56    |
| cr                 | 3         | 7                                                    | 7    | 7     | 7  | 7  | 7  | 7   | 7   | 0   | 7  | 63    |
| ni                 | 2         | 7                                                    | 7    | 7     | 5  | 7  | 7  | 7   | 7   | 7   | 7  | 68    |
| total (core)       |           | 83 complexes, 577 HFX values, 1154 geometries        |      |       |    |    |    |     |     |     |    |       |
| total (additional) |           | 111 complexes, 768 HFX values, 1536 geometries       |      |       |    |    |    |     |     |     |    |       |
| total (all)        |           | 194 complexes, 1345 HFX values, 2690 geometries      |      |       |    |    |    |     |     |     |    |       |

Table S3: List of test structures from the CSD, CSD IDs, metal and oxidation state along with a short note for each and references to the original observations

| number | CSD ID   | Metal | Ox. | Con. Atom (Ax./Equit) | Note                              | Reference |
|--------|----------|-------|-----|-----------------------|-----------------------------------|-----------|
| 1      | CODZAW10 | Co    | 2   | C/N                   | dicyano-cobyrinate                | [19]      |
| 2      | DORLEB   | Co    | 2   | C/N                   | tetrapyrrole                      | [7]       |
| 3      | KOCLET   | Cr    | 3   | Cl/O                  | tetrahydrofuran dichloride        | [14]      |
| 4      | KEHXEA   | Co    | 3   | Cl/N                  | phthalocyanine                    | [25]      |
| 5      | ZUNSEI   | Co    | 3   | Cl/N                  | cylcam                            | [29]      |
| 6      | ABZACO10 | Co    | 2   | O/O                   | benzoate                          | [5]       |
| 7      | LUWPAU   | Fe    | 2   | N/N                   | phthalocyanine                    | [15]      |
| 8      | TPYFEC04 | Fe    | 2   | Cl/N                  | tetrapyrindine                    | [36]      |
| 9      | TPPSFE10 | Fe    | 3   | S/N                   | substitued porphyrin              | [21]      |
| 10     | FUMJOO   | Mn    | 2   | O/O                   | large oxygen ligand               | [8]       |
| 11     | BUHKIA   | Ni    | 2   | O/O                   | sulfoxide, diphenyl-propandionate | [18]      |
| 12     | SUMLET   | Cr    | 3   | C/N                   | cyclam                            | [28]      |
| 13     | BOSDIX   | Fe    | 3   | O/O                   | bidentate oxygen                  | [37]      |
| 14     | BMADFE10 | Fe    | 3   | S/N                   | cyclam                            | [1]       |
| 15     | AHAVUB   | Mn    | 2   | N/O                   | dinitrobenzoate                   | [16]      |
| 16     | DOCNFE   | Fe    | 2   | C/N                   | benzylidioximate                  | [35]      |
| 17     | AFAROO   | Mn    | 3   | C/N                   | cyclam                            | [23]      |
| 18     | AHDNIC   | Ni    | 2   | O/N                   | cyclam                            | [3]       |
| 19     | BUPTAH   | Fe    | 3   | O/O                   | bidentate oxygen                  | [31]      |
| 20     | DEDKII   | Fe    | 2   | O/N                   | nitrogen rings and oxygen         | [11]      |
| 21     | PUTHIX   | Fe    | 2   | N/N                   | bidentate nitrogen                | [39]      |
| 22     | AGIZEX   | Fe    | 2   | N/N                   | bidentate nitrogen                | [26]      |
| 23     | AKAGEY   | Fe    | 3   | N/N                   | large monodentate nitrogen        | [34]      |
| 24     | GUWYUS   | Fe    | 3   | N/N                   | monodentate nitrogen ligand       | [20]      |
| 25     | EGILOW   | Fe    | 3   | O/N                   | heavily substituted porphyrin     | [30]      |
| 26     | BINPET   | Cr    | 3   | O/N                   | cyclam, oxygen                    | [2]       |
| 27     | JUSCIL   | Fe    | 2   | N/N                   | bidentate nitrogen                | [12]      |
| 28     | BULVAG   | Mn    | 2   | O/N                   | salen-like                        | [4]       |
| 29     | FIXGID   | Mn    | 3   | O/N                   | cyclam                            | [24]      |
| 30     | KUSKEQ   | Ni    | 2   | O/O                   | monodentate oxygen                | [33]      |
| 31     | AGUWEE   | Mn    | 2   | O/N                   | cyclic nitrogen                   | [17]      |
| 32     | DMAZCO03 | Co    | 2   | N/N                   | imidazole                         | [38]      |
| 33     | YUJCIQ   | Cr    | 3   | C/N                   | cyclam                            | [27]      |
| 34     | ACALEW   | Cr    | 3   | N/N                   | monodenate nitrogen               | [10]      |
| 35     | AKAGAU   | Cr    | 3   | N/N                   | monodentate nitrogen              | [34]      |

Table S4: Relaxed geometry optimization tolerances for some CSD structures .

| number     | spin | energy tolerance, au  |
|------------|------|-----------------------|
| HFX = 0.20 |      |                       |
| 2          | LS   | $1.05 \times 10^{-5}$ |
| 2          | HS   | $5 \times 10^{-2}$    |
| 1          | LS   | $5 \times 10^{-6}$    |

Table S5: Excluded structures due to spin contamination

| metal | ox | axlig | eqlig | aHF                        | metal | ox | axlig | eqlig | aHF        |
|-------|----|-------|-------|----------------------------|-------|----|-------|-------|------------|
| cr    | 3  | nh3   | nh3   | all (7)                    | fe    | 2  | tbuc  | tbuc  | 0.30       |
| mn    | 3  | pisc  | h2o   | 0.30                       | mn    | 2  | ox    | ox    | 0.25, 0.30 |
| cr    | 3  | tbuc  | tbuc  | 0, 0.05                    |       |    |       |       |            |
| total |    |       |       | 5 complexes, 13 HFX values |       |    |       |       |            |

Table S6: Excluded structures due to geometric breakup

| metal | ox | axlig | eqlig | aHF                         | metal | ox | axlig | eqlig | aHF     |
|-------|----|-------|-------|-----------------------------|-------|----|-------|-------|---------|
| co    | 3  | nh3   | co    | 0                           | ni    | 2  | cn    | cn    | 0,0.05  |
| mn    | 3  | ncs   | ncs   | all (7)                     | cr    | 2  | ncs   | ncs   | all (7) |
| mn    | 2  | cn    | cn    | all (7)                     | co    | 2  | cn    | cn    | all (7) |
| cr    | 2  | cn    | cn    | all (7)                     | cr    | 2  | ncs   | pisc  | 0       |
| fe    | 3  | co    | scn   | 0,0.05                      | fe    | 2  | ncs   | pisc  | 0.25    |
| ni    | 2  | nh3   | cn    | all (7)                     | ni    | 2  | scn   | ox    | all (7) |
| ni    | 2  | h2o   | h2o   | all (7)                     |       |    |       |       |         |
| total |    |       |       | 13 complexes, 63 HFX values |       |    |       |       |         |

Table S7: List of input space descriptors and the normalization constants used in the ANNs. For a given variable  $x$ , the normalization is  $\tilde{x} = \frac{x-c}{f}$ .

| name            | unit         | $c$     | $f$    |
|-----------------|--------------|---------|--------|
| split energy    | kcal/mol     | -54.19  | 142.71 |
| HFX sensitivity | kcal/mol.HFX | -174.20 | 161.58 |
| ls min bond     | Å            | 1.8146  | 0.6910 |
| hs min bond     | Å            | 1.8882  | 0.6956 |
| oxidation state |              | 2       | 1      |
| $a_{HF}$        |              | 0       | 0.3    |
| axlig charge    |              | -2      | 2      |
| eqlig charge    |              | -2      | 2      |
| axlig dent      |              | 1       | 1      |
| eqlig dent      |              | 1       | 3      |
| mdelen          |              | -5.34   | 12.54  |
| maxmd           |              | -0.89   | 2.09   |
| axlig bo        |              | 0       | 3      |
| eqlig bo        |              | 0.00    | 3      |
| axlig ki        |              | 0.00    | 4.29   |
| eqlig ki        |              | 0.00    | 6.96   |



Table S8: Variable Selection for  $\Delta E_{\text{HS-LS}}$ : set **a**. Values are given for regularized and unregularized coefficients and MSE in kcal<sup>2</sup>/mol<sup>2</sup>

|                | unregularized          | $\mathcal{L}_1$ regularization |
|----------------|------------------------|--------------------------------|
| (Intercept)    | 7.13                   | 1.14                           |
| metalcr        | -23.3                  | -17.3                          |
| metalfc        | -8.43                  | -2.76                          |
| metalmn        | -25.4                  | -19                            |
| metalni        | -29.8                  | -23.9                          |
| ox             | 6.73                   | 6                              |
| alpha          | -69.4                  | -64.4                          |
| axligbipy      | 1.82                   | 3.48                           |
| axligc2h3ns    | 29.2                   | 24.4                           |
| axligcl        | -9.54                  | -4.77                          |
| axligcn        | 11.7                   | 12.5                           |
| axligco        | 8.79                   | 4.07                           |
| axligen        | -4.65                  | 0                              |
| axligh2o       | -10.3                  | -9.9                           |
| axligncs       | -10.2                  | -4.6                           |
| axlignh3       | 4.86                   | 0.21                           |
| axligox        | -22                    | -0.42                          |
| axligphen      | -1.86                  | 0                              |
| axligpisc      | 1.23                   | 0                              |
| axligporphyrin | 0                      | 0                              |
| axligscn       | -1.19                  | 0                              |
| axligtbuc      | -8.8                   | 0                              |
| eqligbipy      | 9.07                   | 0                              |
| eqligc2h3n     | -1.19                  | $1.37 \times 10^{-5}$          |
| eqligcl        | -6.67                  | -2.43                          |
| eqligcn        | 8.06                   | 10.2                           |
| eqligco        | 11.1                   | 12.7                           |
| eqligen        | 10.1                   | 0.284                          |
| eqligh2o       | -4.94                  | -4.31                          |
| eqligncs       | -3.36                  | -0.298                         |
| eqlignh3       | -0.946                 | 0                              |
| eqligox        | 9.04                   | 0                              |
| eqligphen      | 15.8                   | 6.99                           |
| eqligpisc      | 34.2                   | 31.2                           |
| eqligporphyrin | 35.3                   | 13.2                           |
| eqligscn       | -4.83                  | 0                              |
| eqligtbuc      | -4.26                  | -1.58                          |
| axlig charge   | $-9.92 \times 10^{-2}$ | 5.36                           |
| eqlig charge   | -2.29                  | 0                              |
| axlig dent     | 4.05                   | 0                              |
| eqlig dent     | -7.86                  | 0                              |
| MSE            | 199                    | 213                            |

Table S9: Variable Selection for  $\Delta E_{\text{HS-LS}}$ : set **b**. Values are given for regularized and unregularized linear coefficients and MSE in kcal<sup>2</sup>/mol<sup>2</sup>

|                 | unregularized | $\mathcal{L}_1$ regularization |
|-----------------|---------------|--------------------------------|
| (Intercept)     | 20.6          | 18.3                           |
| metalc          | -22.3         | -17.9                          |
| metalf          | -7.03         | -2.25                          |
| metalm          | -24           | -19.1                          |
| metalni         | -28.6         | -23.6                          |
| ox              | 6.63          | 6.1                            |
| alpha           | -69.5         | -65                            |
| axlig charge    | 3.55          | 2                              |
| eqlig charge    | -0.613        | 0.107                          |
| axlig dent      | 6.83          | 0.999                          |
| eqlig dent      | -0.633        | 0                              |
| axlig connectCl | -12.9         | -9.59                          |
| axlig connectN  | -10.2         | -6.14                          |
| axlig connectO  | -17.1         | -12.4                          |
| axlig connectS  | -4.6          | -2.39                          |
| eqlig connectCl | -23.1         | -21.2                          |
| eqlig connectN  | -18.2         | -16.1                          |
| eqlig connectO  | -23.6         | -21.5                          |
| eqlig connectS  | -21.6         | -18.8                          |
| axlig natoms    | -0.235        | 0                              |
| eqlig natoms    | 0.525         | 0.414                          |
| MSE             | 218           | 227                            |

Table S10: Variable Selection for  $\Delta E_{\text{HS-LS}}$ : set **c**. Values are given for regularized and unregularized linear coefficients and MSE in kcal<sup>2</sup>/mol<sup>2</sup>

|                     | unregularized | $\mathcal{L}_1$ regularization |
|---------------------|---------------|--------------------------------|
| (Intercept)         | 26.4          | 13.6                           |
| metalc              | -22.5         | -18.6                          |
| metalf              | -7.1          | -3.18                          |
| metalm              | -24           | -20                            |
| metalni             | -28.9         | -24.7                          |
| ox                  | 6.6           | 6.17                           |
| alpha               | -69.4         | -66.1                          |
| axlig charge        | 3.57          | 2.34                           |
| eqlig charge        | -1.22         | 0.702                          |
| axlig dent          | 8.6           | 0                              |
| eqlig dent          | -0.841        | 0                              |
| axlig connectCl     | -17.3         | -7.43                          |
| axlig connectN      | -19           | -0.818                         |
| axlig connectO      | -28.9         | -4.73                          |
| axlig connectS      | -9.04         | 0                              |
| eqlig connectCl     | -26           | -16.8                          |
| eqlig connectN      | -24.6         | -5.78                          |
| eqlig connectO      | -31.5         | -8.28                          |
| eqlig connectS      | -24.6         | -14                            |
| axlig natoms        | -0.299        | 0                              |
| eqlig natoms        | 0.568         | 0.399                          |
| $\Sigma \Delta\chi$ | -0.203        | -1.95                          |
| min $\Delta\chi$    | 7.08          | 0                              |
| max $\Delta\chi$    | 5.43          | -1.33                          |
| MSE                 | 216           | 230                            |

Table S11: Variable Selection for  $\Delta E_{\text{HS-LS}}$ : set **d**. Values are given for regularized and unregularized linear coefficients and MSE in kcal<sup>2</sup>/mol<sup>2</sup>

|                     | unregularized | $\mathcal{L}_1$ regularization |
|---------------------|---------------|--------------------------------|
| (Intercept)         | 26.1          | 14.8                           |
| metalc              | -22.5         | -18.9                          |
| metalf              | -7.1          | -3.49                          |
| metalm              | -24.1         | -20.3                          |
| metalni             | -28.8         | -25.1                          |
| ox                  | 6.58          | 6.2                            |
| alpha               | -69.4         | -66.4                          |
| axlig charge        | 3.69          | 2.39                           |
| eqlig charge        | -1.3          | 0.595                          |
| axlig dent          | 7.92          | 0.115                          |
| eqlig dent          | -0.48         | 0                              |
| axlig connectCl     | -15.2         | -7.78                          |
| axlig connectN      | -15.2         | -1.6                           |
| axlig connectO      | -23.9         | -5.75                          |
| axlig connectS      | -7.03         | 0                              |
| eqlig connectCl     | -27.3         | -17.8                          |
| eqlig connectN      | -26.9         | -7.23                          |
| eqlig connectO      | -34.5         | -10.1                          |
| eqlig connectS      | -25.8         | -15.1                          |
| axlig natoms        | -0.277        | 0                              |
| eqlig natoms        | 0.556         | 0.407                          |
| max $\Delta\chi$    | -1.79         | -1.47                          |
| $\Sigma \Delta\chi$ | 2             | -1.68                          |
| MSE                 | 216           | 228                            |

Table S12: Variable selection for  $\Delta E_{\text{HS-LS}}$ : set **e**. Values are given for regularized and unregularized linear coefficients and MSE in kcal<sup>2</sup>/mol<sup>2</sup>

|                     | unregularized         | $\mathcal{L}_1$ regularization |
|---------------------|-----------------------|--------------------------------|
| (Intercept)         | 32.7                  | 19.1                           |
| metalcr             | -22.2                 | -19.8                          |
| metalfc             | -7.72                 | -4.74                          |
| metalmn             | -24.1                 | -21.5                          |
| metalni             | -29.6                 | -26.4                          |
| ox                  | 6.6                   | 6.38                           |
| alpha               | -69.3                 | -67.3                          |
| axlig charge        | 5.12                  | 2.83                           |
| eqlig charge        | -3.68                 | 0                              |
| axlig dent          | 6.49                  | 1.89                           |
| eqlig dent          | 0.769                 | 0.283                          |
| axlig connectCl     | -16.7                 | -10.8                          |
| axlig connectN      | -13.6                 | -4.97                          |
| axlig connectO      | -18.1                 | -8.77                          |
| axlig connectS      | 0.368                 | 0                              |
| eqlig connectCl     | -26.5                 | -19.7                          |
| eqlig connectN      | -30.7                 | -14                            |
| eqlig connectO      | -46.1                 | -20.4                          |
| eqlig connectS      | -37.8                 | -21.2                          |
| axlig natoms        | $-4.3 \times 10^{-2}$ | 0                              |
| eqlig natoms        | 0.32                  | 0.378                          |
| axlig bo            | 3.64                  | 1.39                           |
| eqlig bo            | -5.96                 | -1.78                          |
| $\Sigma \Delta\chi$ | 2.25                  | -0.591                         |
| max $\Delta\chi$    | -2.41                 | -1.46                          |
| MSE                 | 213                   | 221                            |

Table S13: Variable selection for  $\Delta E_{\text{HS-LS}}$ : set **f**. Values are given for regularized and unregularized linear coefficients and MSE in kcal<sup>2</sup>/mol<sup>2</sup>

|                     | unregularized | $\mathcal{L}_1$ regularization |
|---------------------|---------------|--------------------------------|
| (Intercept)         | 27.8          | 17.8                           |
| metalcr             | -22.4         | -19.5                          |
| metalfe             | -6.83         | -3.71                          |
| metalmn             | -24.3         | -21.1                          |
| metalni             | -29.9         | -26                            |
| ox                  | 6.69          | 6.27                           |
| alpha               | -69.4         | -66.9                          |
| axlig charge        | 2.38          | 2.11                           |
| eqlig charge        | -0.265        | 0.992                          |
| axlig dent          | 11.3          | 2.18                           |
| eqlig dent          | -2.95         | 0.846                          |
| axlig connectCl     | -17.1         | -9.14                          |
| axlig connectN      | -14.4         | -4.04                          |
| axlig connectO      | -25.7         | -9.6                           |
| axlig connectS      | -1.94         | -0.457                         |
| eqlig connectCl     | -28.6         | -21.5                          |
| eqlig connectN      | -33.9         | -14.6                          |
| eqlig connectO      | -39.4         | -17.7                          |
| eqlig connectS      | -35.4         | -22                            |
| axlig ki            | -2.65         | -0.343                         |
| eqlig ki            | 4             | 1.78                           |
| max $\Delta\chi$    | -1.19         | -0.721                         |
| $\Sigma \Delta\chi$ | 2.48          | -0.868                         |
| MSE                 | 218           | 227                            |

Table S14: Variable selection for  $\Delta E_{\text{HS-LS}}$ : set **g**. Values are given for regularized and unregularized linear coefficients and MSE in kcal<sup>2</sup>/mol<sup>2</sup>

|                     | unregularized | $\mathcal{L}_1$ regularization |
|---------------------|---------------|--------------------------------|
| (Intercept)         | 35.2          | 21.6                           |
| metalcr             | -22.2         | -19.6                          |
| metalfe             | -7.5          | -4.28                          |
| metalmn             | -24.4         | -21.5                          |
| metalni             | -30.1         | -26.5                          |
| ox                  | 6.63          | 6.32                           |
| alpha               | -69.3         | -67.1                          |
| axlig charge        | 4.04          | 2.75                           |
| eqlig charge        | -2.84         | 0                              |
| axlig dent          | 10.1          | 2.19                           |
| eqlig dent          | 0.186         | 2.29                           |
| axlig connectCl     | -17.7         | -10.4                          |
| axlig connectN      | -13.9         | -4.73                          |
| axlig connectO      | -22           | -8.81                          |
| axlig connectS      | 0.214         | 0                              |
| eqlig connectCl     | -27.7         | -21.3                          |
| eqlig connectN      | -34           | -16.3                          |
| eqlig connectO      | -47.9         | -23.7                          |
| eqlig connectS      | -41.9         | -25.8                          |
| axlig bo            | 2.05          | 1.24                           |
| eqlig bo            | -5.52         | -2.71                          |
| axlig ki            | -1.66         | 0                              |
| eqlig ki            | 1.97          | 0.925                          |
| max $\Delta\chi$    | -2.08         | -1.09                          |
| $\Sigma \Delta\chi$ | 2.41          | -0.622                         |
| MSE                 | 215           | 223                            |

Table S15: Variable selection for  $\frac{\partial \Delta E_{\text{H-L}}}{\partial a_{\text{HF}}}$ : set **a**. Values are given for regularized and unregularized coefficients and MSE in HF kcal<sup>2</sup>/mol<sup>2</sup>HFX<sup>2</sup>

|                | unregularized          | $\mathcal{L}_1$ regularization |
|----------------|------------------------|--------------------------------|
| (Intercept)    | -167                   | -167                           |
| metalcr        | 21.7                   | 21.2                           |
| metalfe        | -26.3                  | -26.3                          |
| metalmn        | -15.2                  | -15.2                          |
| metalni        | 14.9                   | 14.2                           |
| ox             | 28.2                   | 27.9                           |
| eqligbipy      | -20.7                  | -16.6                          |
| eqligc2h3ns    | -30.5                  | -30.1                          |
| eqligcl        | -2.95                  | -0.898                         |
| eqligcn        | -6.33                  | -4.87                          |
| eqligco        | -18.4                  | -14.8                          |
| eqligen        | -4.02                  | -1.31                          |
| eqligh2o       | 8.22                   | 11.8                           |
| eqligncs       | 1.03                   | 2.08                           |
| eqlignh3       | 4.88                   | 7.82                           |
| eqligox        | -0.272                 | -1.45                          |
| eqligphen      | -1.28                  | 0                              |
| eqligpisc      | -31.6                  | -27.5                          |
| eqligporphyrin | 8.4                    | 1.34                           |
| eqligscn       | 6.26                   | 6.82                           |
| eqligtbuc      | 10.8                   | 7.53                           |
| axligbipy      | 15.5                   | 10.2                           |
| axligc2h3ns    | -1.39                  | -0.326                         |
| axligcl        | 6.15                   | 0.329                          |
| axligcn        | -9.2                   | -14                            |
| axligco        | -21.8                  | -24.1                          |
| axligen        | 17.4                   | 13.5                           |
| axligh2o       | 15                     | 11.8                           |
| axligncs       | 7.92                   | 2.13                           |
| axlignh3       | 4.47                   | 2.07                           |
| axligox        | 11                     | 0.491                          |
| axligphen      | -10.2                  | -11.8                          |
| axligpisc      | -16.3                  | -18.9                          |
| axligporphyrin | 0                      | 0                              |
| axligscn       | 2.97                   | -1.65                          |
| axligtbuc      | 8.32                   | 0                              |
| eqlig charge   | 2.31                   | 0                              |
| axlig charge   | -1.12                  | -4.04                          |
| eqlig dent     | -1.75                  | 0                              |
| axlig dent     | $-8.15 \times 10^{-2}$ | 0                              |
| alpha          | 5.72                   | 5.42                           |
| MSE            | 422                    | 423                            |



Table S16: Variable selection for  $\frac{\partial \Delta E_{\text{H-L}}}{\partial a_{\text{HF}}}$ : set **b**. Values are given for regularized and unregularized linear coefficients and MSE in HF kcal<sup>2</sup>/mol<sup>2</sup>HFX<sup>2</sup>

|                 | unregularized         | $\mathcal{L}_1$ regularization |
|-----------------|-----------------------|--------------------------------|
| (Intercept)     | -189                  | -186                           |
| metalc          | 21.9                  | 21.7                           |
| metalf          | -26.9                 | -26.7                          |
| metalm          | -16.3                 | -16.1                          |
| metalni         | 13.8                  | 13.3                           |
| ox              | 28.6                  | 28.2                           |
| eqlig charge    | -0.266                | -0.359                         |
| axlig charge    | -3.79                 | -3.49                          |
| eqlig dent      | 0.179                 | 0                              |
| axlig dent      | -7.42                 | -6.37                          |
| eqlig natoms    | -0.47                 | -0.452                         |
| axlig natoms    | $2.13 \times 10^{-2}$ | 0                              |
| eqlig connectCl | 10.5                  | 9.61                           |
| eqlig connectN  | 17.6                  | 17                             |
| eqlig connectO  | 19.3                  | 18.9                           |
| eqlig connectS  | 20.1                  | 19.2                           |
| axlig connectCl | 18.6                  | 18.1                           |
| axlig connectN  | 24.5                  | 23.8                           |
| axlig connectO  | 29.7                  | 28.8                           |
| axlig connectS  | 18.1                  | 17.7                           |
| alpha           | 4.89                  | 4.58                           |
| MSE             | 472                   | 472                            |

Table S17: Variable selection for  $\frac{\partial \Delta_{\text{EH-L}}}{\partial a_{\text{HF}}}$ : set **c**. Values are given for regularized and unregularized linear coefficients and MSE in HF kcal<sup>2</sup>/mol<sup>2</sup>HFX<sup>2</sup>

|                      | unregularized | $\mathcal{L}_1$ regularization |
|----------------------|---------------|--------------------------------|
| (Intercept)          | -170          | -167                           |
| (Intercept)          | 0             | 0                              |
| metalc               | 20.8          | 20.9                           |
| metalf               | -27.6         | -27.2                          |
| metalm               | -17.1         | -16.8                          |
| metalni              | 13.1          | 12.8                           |
| ox                   | 28.6          | 28.4                           |
| eqlig charge         | -2.06         | -1.99                          |
| axlig charge         | -3.98         | -3.44                          |
| eqlig dent           | 2.38          | 0                              |
| axlig dent           | 0.717         | 0                              |
| eqlig natoms         | -0.385        | -0.325                         |
| axlig natoms         | -0.144        | -0.161                         |
| eqlig connectCl      | -2.56         | 0.619                          |
| eqlig connectN       | -9.37         | -2.65                          |
| eqlig connectO       | -13.9         | -5.88                          |
| eqlig connectS       | 6.76          | 9.66                           |
| axlig connectCl      | 6.83          | 7.52                           |
| axlig connectN       | -0.514        | 2.22                           |
| axlig connectO       | -4.21         | 0                              |
| axlig connectS       | 5.29          | 6.36                           |
| alpha                | 4.21          | 3.69                           |
| $\Sigma \Delta \chi$ | 1.76          | 1.02                           |
| max $\Delta \chi$    | 14.4          | 13.1                           |
| min $\Delta \chi$    | 14.2          | 13                             |
| MSE                  | 449           | 450                            |

Table S18: Variable selection for  $\frac{\partial \Delta E_{\text{H-L}}}{\partial a_{\text{HF}}}$ : set **d**. Values are given for regularized and unregularized linear coefficients and MSE in HF kcal<sup>2</sup>/mol<sup>2</sup>HFX<sup>2</sup>

|                      | unregularized | $\mathcal{L}_1$ regularization |
|----------------------|---------------|--------------------------------|
| (Intercept)          | -168          | -166                           |
| metalc               | 20.8          | 20.9                           |
| metalf               | -27.4         | -27.2                          |
| metalm               | -17.2         | -17                            |
| metalni              | 13.2          | 12.8                           |
| ox                   | 28.6          | 28.4                           |
| eqlig charge         | -2.24         | -2.05                          |
| axlig charge         | -3.61         | -3.24                          |
| eqlig dent           | 0.574         | -0.291                         |
| axlig dent           | -1.65         | -1.14                          |
| eqlig natoms         | -0.388        | -0.347                         |
| axlig natoms         | -0.108        | -0.147                         |
| eqlig connectCl      | -4.31         | 0                              |
| eqlig connectN       | -12.4         | -6.75                          |
| eqlig connectO       | -18.8         | -11.6                          |
| eqlig connectS       | 5.36          | 8.2                            |
| axlig connectCl      | 10.9          | 10.6                           |
| axlig connectN       | 7.03          | 8.26                           |
| axlig connectO       | 5.61          | 7.47                           |
| axlig connectS       | 9.34          | 9.41                           |
| alpha                | 4.17          | 3.55                           |
| $\Sigma \Delta \chi$ | 5.86          | 4.97                           |
| max $\Delta \chi$    | 0.542         | 0.725                          |
| MSE                  | 451           | 452                            |

Table S19: Variable selection for  $\frac{\partial \Delta E_{\text{H-L}}}{\partial a_{\text{HF}}}$ : set **e**. Values are given for regularized and unregularized linear coefficients and MSE in HF kcal<sup>2</sup>/mol<sup>2</sup>HF<sup>2</sup>

|                      | unregularized          | $\mathcal{L}_1$ regularization |
|----------------------|------------------------|--------------------------------|
| (Intercept)          | -190                   | -187                           |
| metalc               | 20.7                   | 20.6                           |
| metalf               | -26.5                  | -26.4                          |
| metalm               | -16.9                  | -16.8                          |
| metalni              | 13.9                   | 13.5                           |
| ox                   | 28.6                   | 28.3                           |
| eqlig charge         | 0.243                  | 0                              |
| axlig charge         | -4.29                  | -3.67                          |
| eqlig dent           | 0.362                  | -1.06                          |
| axlig dent           | -3.11                  | -1.84                          |
| eqlig natoms         | -0.252                 | -0.172                         |
| axlig natoms         | $-6.34 \times 10^{-2}$ | -0.159                         |
| eqlig connectCl      | -4.69                  | -0.473                         |
| eqlig connectN       | -9.57                  | -3.89                          |
| eqlig connectO       | -8.03                  | -0.743                         |
| eqlig connectS       | 16.6                   | 19.5                           |
| axlig connectCl      | 12.8                   | 12.3                           |
| axlig connectN       | 8.55                   | 9.11                           |
| axlig connectO       | 7.62                   | 8.08                           |
| axlig connectS       | 10.1                   | 9.26                           |
| alpha                | 5.12                   | 4.43                           |
| axlig bo             | $5 \times 10^{-1}$     | 0                              |
| eqlig bo             | 5.57                   | 5.77                           |
| $\Sigma \Delta \chi$ | 5.62                   | 4.81                           |
| max $\Delta \chi$    | 1.4                    | 1.45                           |
| MSE                  | 444                    | 445                            |

Table S20: Variable selection for  $\frac{\partial \Delta E_{\text{H-L}}}{\partial a_{\text{HF}}}$ : set f. Values are given for regularized and unregularized linear coefficients and MSE in HF kcal<sup>2</sup>/mol<sup>2</sup>HFX<sup>2</sup>

|                    | unregularized | $\mathcal{L}_1$ regularization |
|--------------------|---------------|--------------------------------|
| (Intercept)        | -192          | -122                           |
| metalc             | 20.9          | 17.9                           |
| metalf             | -27.7         | -21.6                          |
| metalm             | -16.8         | -10.8                          |
| metalni            | 14.3          | 1.98                           |
| ox                 | 28.5          | 19.8                           |
| eqlig charge       | -1.58         | -0.317                         |
| axlig charge       | -3.9          | -2.2                           |
| eqlig dent         | 9.74          | 0                              |
| axlig dent         | -0.587        | 0                              |
| eqlig connectCl    | -1.05         | 0                              |
| eqlig connectN     | -0.537        | 0                              |
| eqlig connectO     | -5.67         | 0                              |
| eqlig connectS     | 16.9          | 0                              |
| axlig connectCl    | 15.5          | 0                              |
| axlig connectN     | 13.8          | 0                              |
| axlig connectO     | 15.2          | 0                              |
| axlig connectS     | 11.4          | 0                              |
| n alpha            | 5.18          | 0                              |
| axlig ki           | -0.177        | 0                              |
| eqlig ki           | -4.11         | 0                              |
| max $\Delta\chi$   | 0.434         | 0                              |
| $\Sigma\Delta\chi$ | 3.91          | 4.27                           |
| MSE                | 453           | 553                            |

Table S21: Variable selection for  $\frac{\partial \Delta E_{\text{H-L}}}{\partial a_{\text{HF}}}$ : set **g**. Values are given for regularized and unregularized linear coefficients and MSE in HF kcal<sup>2</sup>/mol<sup>2</sup>HF<sup>2</sup>

|                    | unregularized | $\mathcal{L}_1$ regularization |
|--------------------|---------------|--------------------------------|
| (Intercept)        | -192          | -187                           |
| metalc             | 20.9          | 20.8                           |
| metalf             | -27.7         | -27.5                          |
| metalm             | -16.8         | -16.6                          |
| metalni            | 14.3          | 13.8                           |
| ox                 | 28.5          | 28.2                           |
| eqlig charge       | -1.58         | -1.68                          |
| axlig charge       | -3.9          | -3.66                          |
| eqlig dent         | 9.74          | 7.56                           |
| axlig dent         | -0.587        | 0                              |
| eqlig connectCl    | -1.05         | 0                              |
| eqlig connectN     | -0.537        | 0                              |
| eqlig connectO     | -5.67         | -3.96                          |
| eqlig connectS     | 16.9          | 15.7                           |
| axlig connectCl    | 15.5          | 14.3                           |
| axlig connectN     | 13.8          | 13.3                           |
| axlig connectO     | 15.2          | 14.4                           |
| axlig connectS     | 11.4          | 11.3                           |
| alpha              | 5.18          | 4.64                           |
| axlig ki           | -0.177        | -0.364                         |
| eqlig ki           | -4.11         | -3.37                          |
| max $\Delta\chi$   | 0.434         | 0.522                          |
| $\Sigma\Delta\chi$ | 3.91          | 3.83                           |
| MSE                | 453           | 454                            |

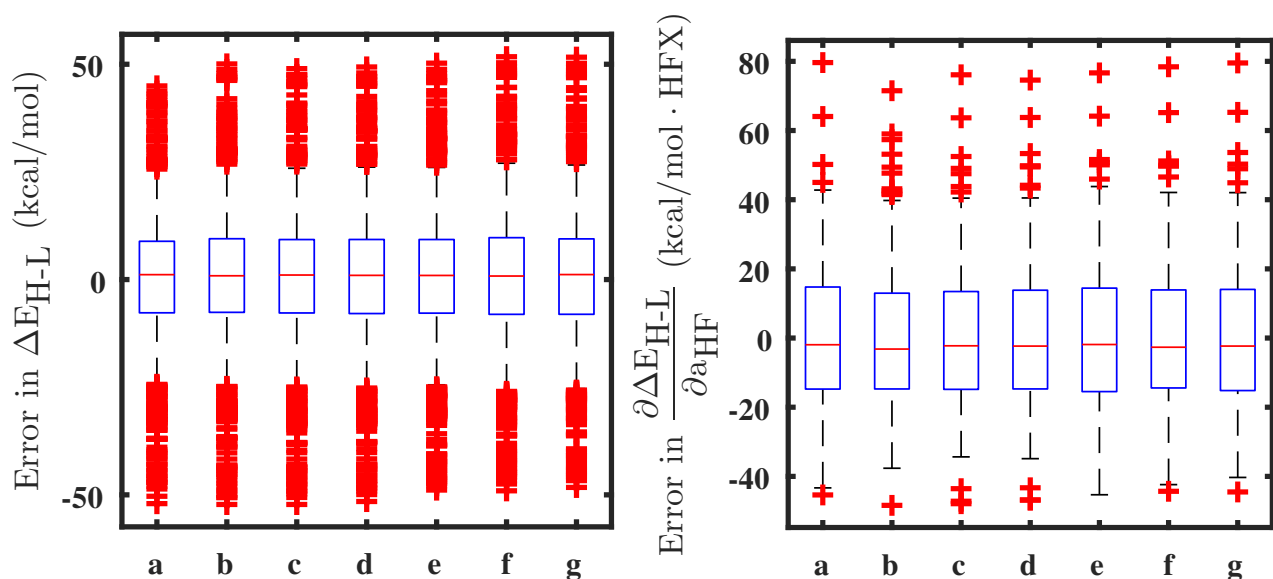

Figure S1: Comparison of errors for different descriptor sets for a regularized linear effects model predicting  $\Delta E_{\text{H-L}}$  in kcal/mol (left) and  $\frac{\partial \Delta E_{\text{H-L}}}{\partial a_{\text{HF}}}$  in kcal/mol·HF (right). Set **a** includes the metal properties and full ligand identity and number of atoms. Set **b** replaces ligand identity with the identity of connection atom only, while set **c** adds information from the sum, maximum and minimum ligand  $\delta\chi$  to set **b**. Set **d** is the same as set **c** but excludes the minimum  $\delta\chi$ . Set **e** adds in bond order information with an MSE, while set **f** replaces the ligand size metric with our truncated index. Set **g** represents our final set, and includes the same descriptors from **f** and adds bond order information.

Table S22: Optimal hyperparameter selection for KRR and SVR models found via a grid search and 10-fold cross-validation. Parameters were selected using a cartesian grid search in  $[10^{-7}, 10^4]$  for the regularization weights,  $[10^{-4}, 10^3]$  for the exponential kernel correlation length and  $[0.1, 0.9]$  for  $\nu$ .

|                                    | $\sigma$<br>(kernel lengthscale) | $\lambda/C$ (KRR/SVR)<br>(regularization weight) | $\nu$<br>(SV fraction) |
|------------------------------------|----------------------------------|--------------------------------------------------|------------------------|
| KRR (set <b>g</b> )                | 1                                | $10^{-4}$                                        |                        |
| SVR (set <b>g</b> )                | 1                                | 100                                              | 0.75                   |
| KRR (sorted Coulomb Matrix, B3LYP) |                                  |                                                  |                        |
| KRR (sorted Coulomb Matrix, B3LYP) | 316                              | 0.01                                             |                        |

Figure S2: Binary ground state classification tree for heteroleptic compounds. M indicates metal identity, l ligand connection atom, o oxidation state, a the fraction of HF exchange and me the sum of  $\delta\chi$  values across ligands. The first line in each leaf node is the percent of elements in that leaf that have the indicated ground state, and the second line indicates the percentage of the total heteroleptic population in each leaf node. Dashed blue arrows indicate yes, solid red arrows indicate no.

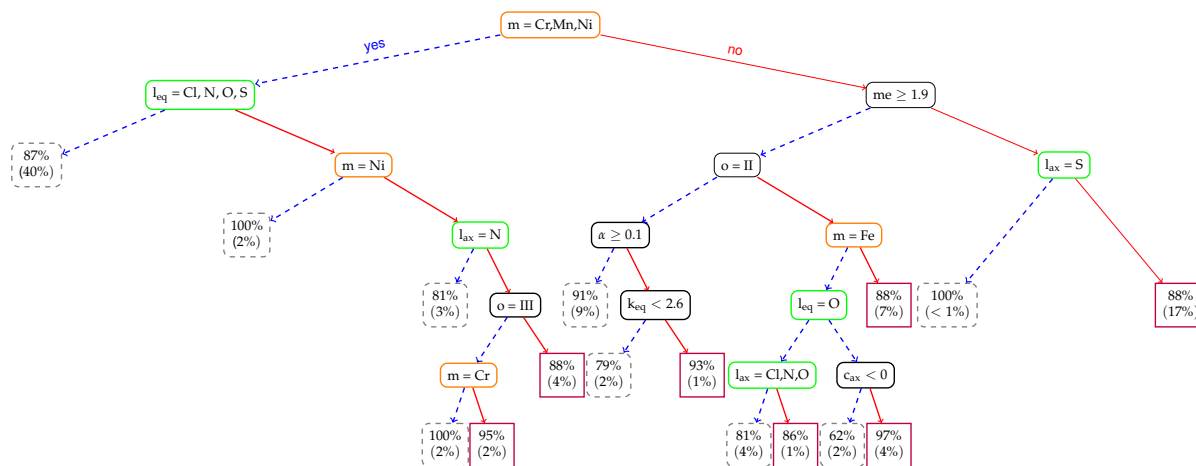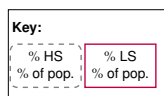



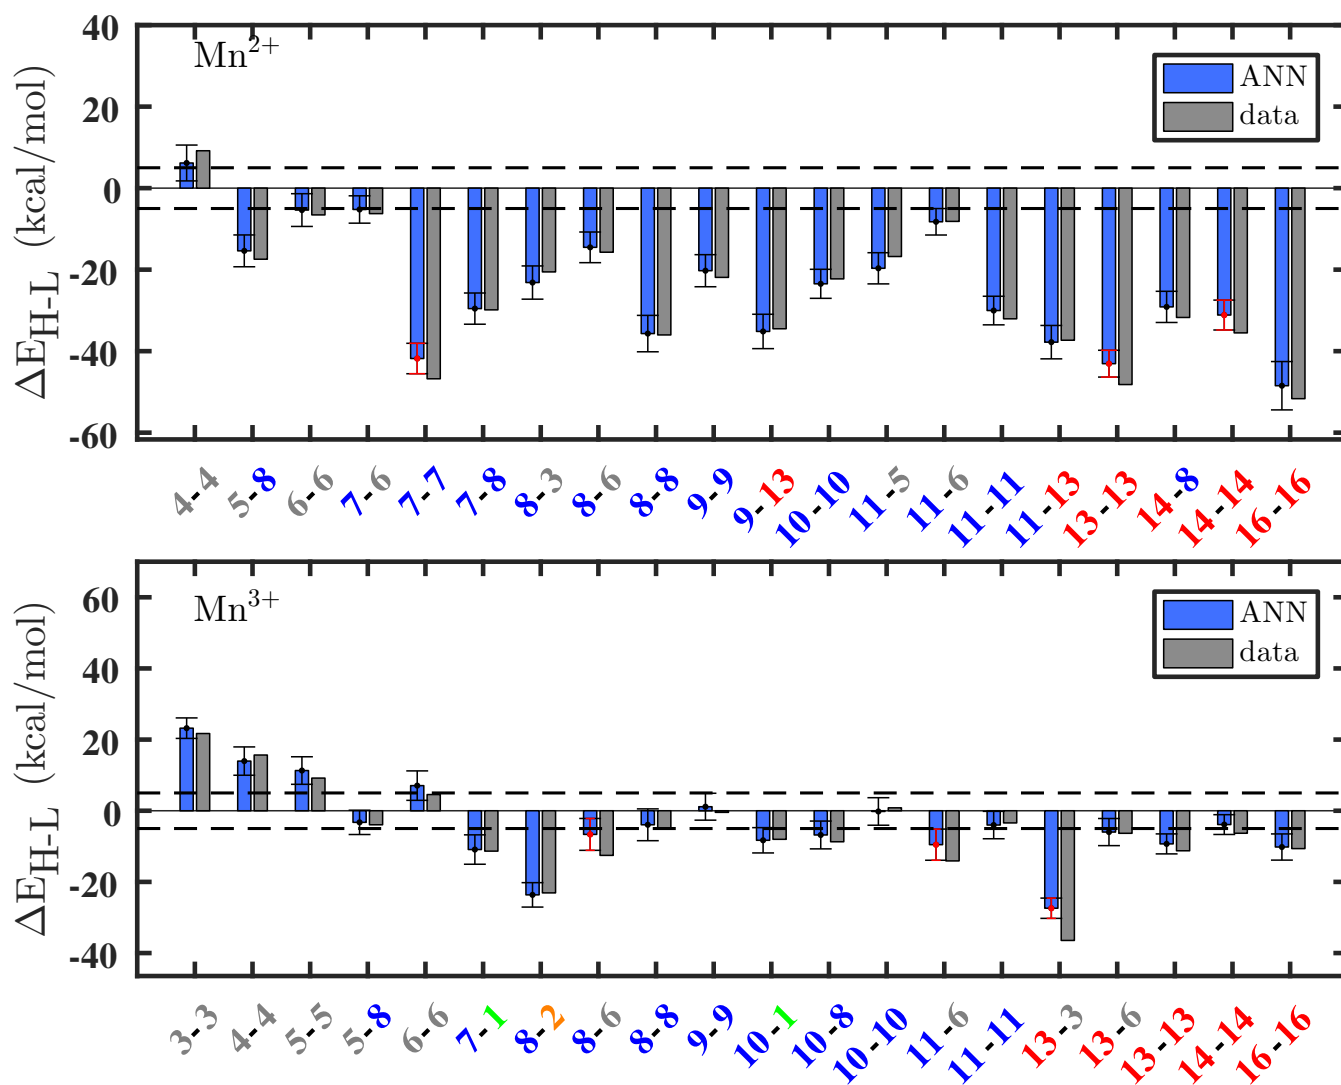

Figure S3: Model predictions of  $\Delta E_{H-L}$  and data for Mn using an ANN. The ligands are described by two numbers indicating the equatorial first and then the axial, color coded by ligand identity (green for halogen, gray for carbon, blue for nitrogen, and red for oxygen). The error bars represent an estimated 1 standard deviation from the mean prediction.

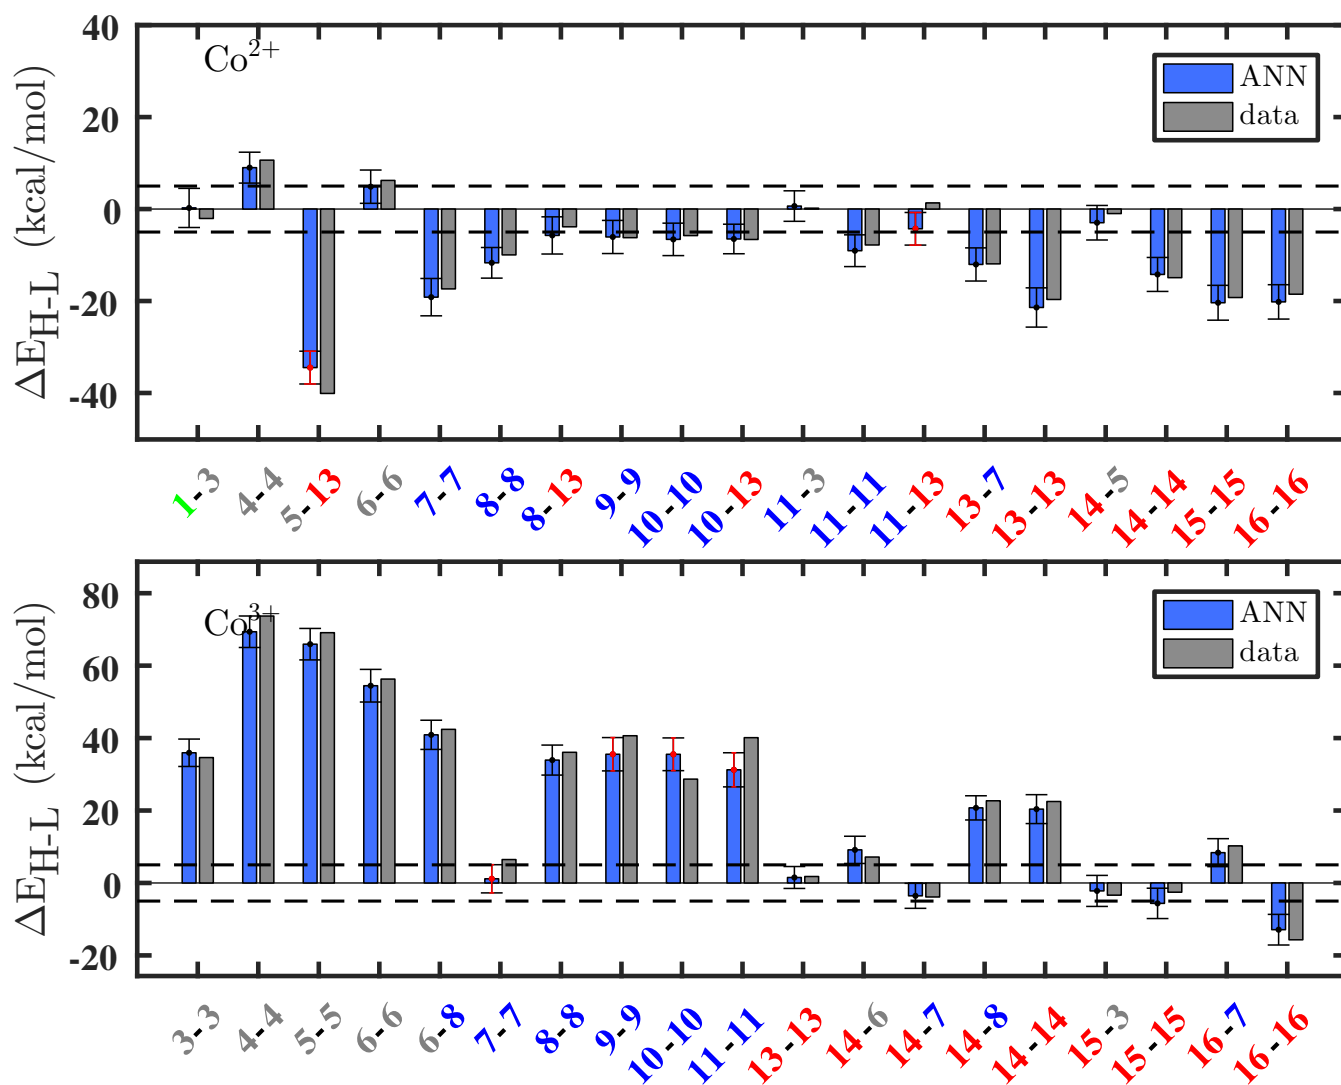

Figure S4: Model predictions of  $\Delta E_{\text{HS-LS}}$  and data for Co using an ANN. The ligands are described by two numbers indicating the equatorial first and then the axial, color coded by ligand identity (green for halogen, gray for carbon, blue for nitrogen, and red for oxygen). The error bars represent an estimated 1 standard deviation from the mean prediction.

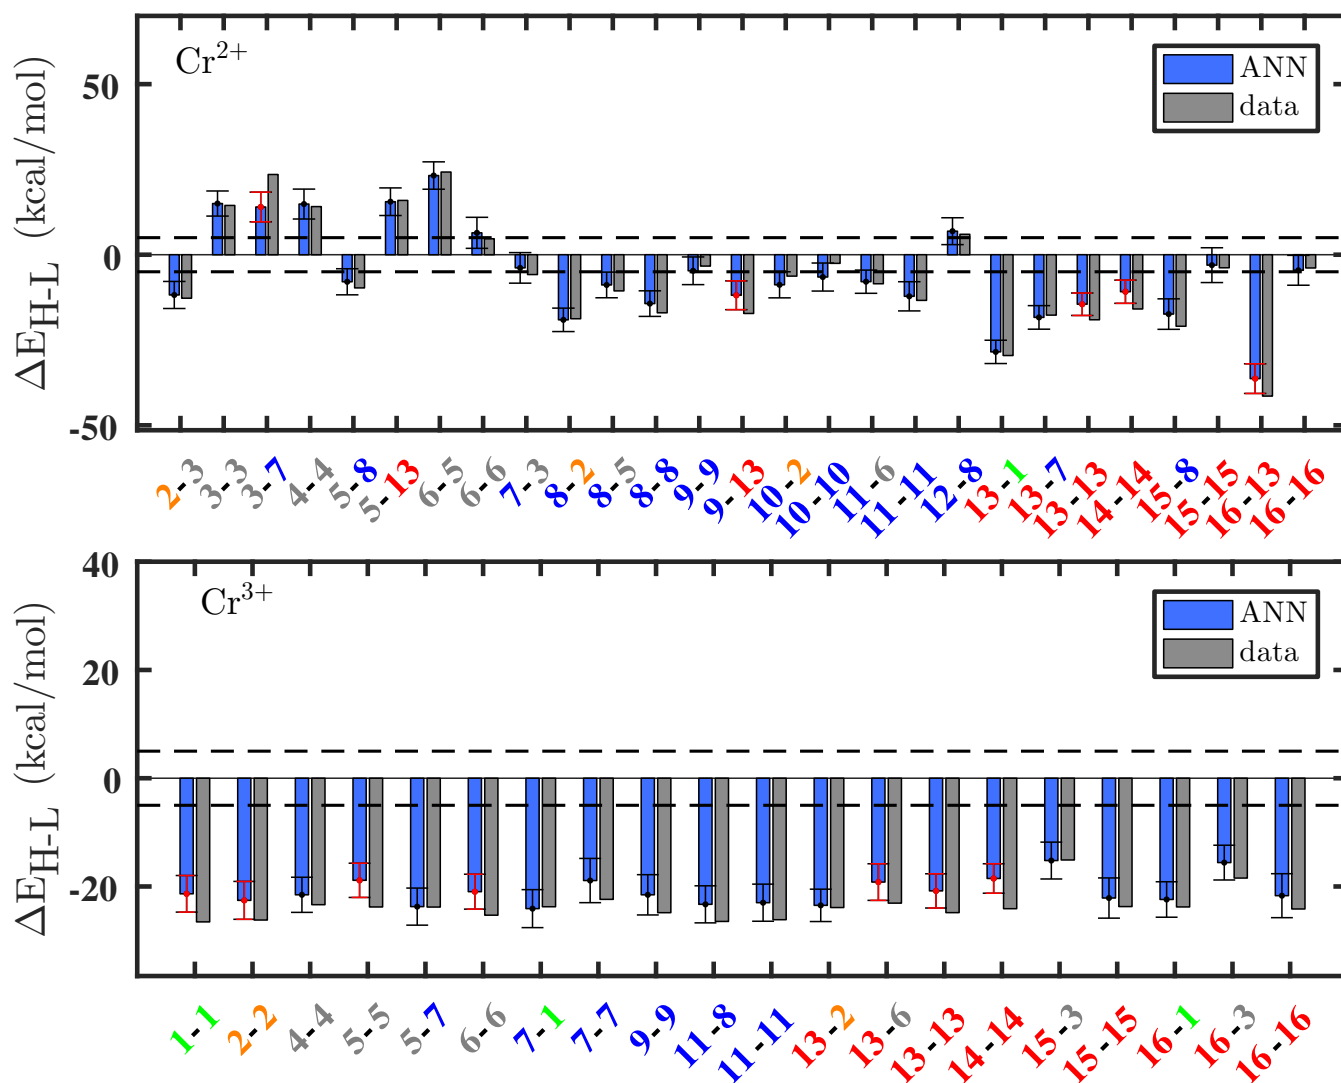

Figure S5: Model predictions of  $\Delta E_{\text{H-L}}$  and data for Cr using an ANN. The ligands are described by two numbers indicating the equatorial first and then the axial, color coded by ligand identity (green for halogen, gray for carbon, blue for nitrogen, and red for oxygen). The error bars represent an estimated 1 standard deviation from the mean prediction.

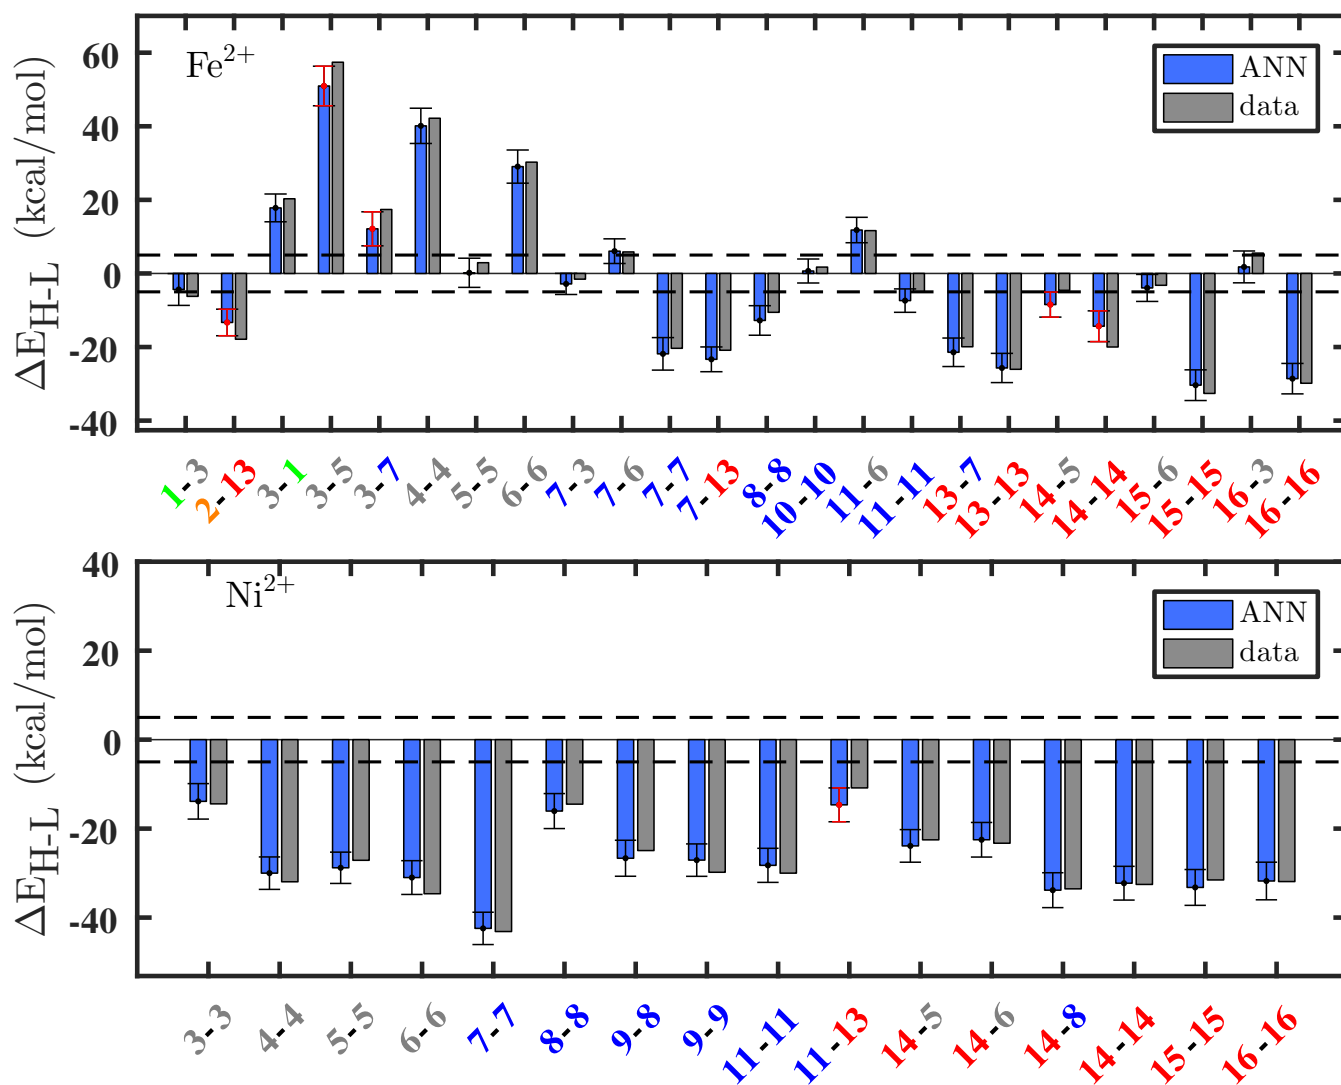

Figure S6: Model predictions of  $\Delta E_{H-L}$  and data for Fe(II) (top) and Ni(II) (bottom) using an ANN. The ligands are described by two numbers indicating the equatorial first and then the axial, color coded by ligand identity (green for halogen, gray for carbon, blue for nitrogen, and red for oxygen). The error bars represent an estimated 1 standard deviation from the mean prediction.

Table S23: Splitting energy predictions and data in kcal/mol, compared for the full set of complexes. Each complex is named [metal oxidation axial ligand eq equatorial ligand]. For each complex, the first row has the data obtained from DFT using varying fractions of exact exchange ( $a_{\text{HF}}$ ) and the second row has the ANN predictions

| name                     | type | $a_{\text{HF}}$ |         |        |         |       |       |        |
|--------------------------|------|-----------------|---------|--------|---------|-------|-------|--------|
|                          |      | 0.00            | 0.05    | 0.1    | 0.15    | 0.20  | 0.25  | 0.30   |
| cr 2 eq h2o ax ncs       | data | -12.6           | -14.5   | -15.7  | -16.7   | -17.7 | -18.6 | -19.5  |
|                          | pred | -8.37           | -13.1   | -15.4  | -16.9   | -18.4 | -19.9 | -21.8  |
| cr 2 eq porphyrin ax nh3 | data | 13.8            | 11.9    | 9.98   | 8.13    | 5.99  | 5.55  | 5.32   |
|                          | pred | 11.9            | 11      | 10     | 8.58    | 6.9   | 5.31  | 3.81   |
| cr 2 eq scn ax pisc      | data | 5.14            | 0.567   | -4     | -8.44   | -12.7 | -16.9 | -20.8  |
|                          | pred | 7.04            | 2.99    | -2.5   | -7.76   | -11.8 | -15.1 | -18.3  |
| cr 2 eq ncs ax pisc      | data | 11.3            | 8.27    | 3.43   | -1.33   | -5.82 | -10   | -13.9  |
|                          | pred | 8.4             | 6.51    | 3.61   | -0.0798 | -3.86 | -6.58 | -8.45  |
| cr 2 eq cn ax nh3        | data | 5.23            | -1.62   | -4.91  | -7.48   | -9.73 | -10.4 | -12.5  |
|                          | pred | 4.81            | 0.785   | -2.55  | -5.35   | -7.93 | -10.2 | -12    |
| cr 2 eq tbuc ax tbuc     | data | 7.45            | 4.37    | 1.46   | -1.26   | -3.83 | -6.25 | -8.56  |
|                          | pred | 4.1             | 3.19    | 1.94   | -0.0318 | -3.06 | -6.91 | -10.9  |
| cr 2 eq phen ax scn      | data | 10.2            | 6.45    | 2.19   | -2.07   | -6.28 | -10.4 | -14.4  |
|                          | pred | 8.11            | 4.4     | 0.0103 | -4.36   | -8.82 | -13.5 | -18.4  |
| cr 2 eq en ax co         | data | 9.12            | 4.19    | -0.386 | -4.62   | -8.51 | -12.1 | -15.3  |
|                          | pred | 10.5            | 3.83    | -1.79  | -5.36   | -7.91 | -11.2 | -13.9  |
| cr 2 eq bipy ax bipy     | data | 10.2            | 7.27    | 3.64   | 0.0782  | -3.33 | -6.49 | -9.29  |
|                          | pred | 9.12            | 3.51    | -0.407 | -2.82   | -4.71 | -6.48 | -8.2   |
| cr 2 eq en ax en         | data | -7.2            | -8.91   | -10.5  | -12     | -13.4 | -14.7 | -16    |
|                          | pred | -3.58           | -6.9    | -9.09  | -10.8   | -12.2 | -13.2 | -13.9  |
| cr 2 eq co ax cn         | data | 36.5            | 39.7    | 34.4   | 29.3    | 24.2  | 19.3  | 14.6   |
|                          | pred | 36.4            | 34.4    | 31.7   | 27.9    | 23.2  | 18.4  | 14     |
| cr 2 eq pisc ax pisc     | data | 33.2            | 28      | 23.2   | 18.7    | 14.4  | 10.5  | 6.85   |
|                          | pred | 29.7            | 26.7    | 23.1   | 18.8    | 15    | 12    | 9.41   |
| cr 2 eq ox ax h2o        | data | -29.3           | -32.5   | -35.5  | -38.5   | -41.4 | -44.3 | -47    |
|                          | pred | -27.6           | -30.2   | -32.8  | -34.9   | -36.3 | -37.5 | -38.4  |
| cr 2 eq h2o ax cl        | data | -26.6           | -27.4   | -27.6  | -28.3   | -29.6 | -30.2 | -30.7  |
|                          | pred | -23.8           | -25.2   | -26.4  | -27.5   | -28.5 | -29.4 | -30.3  |
| cr 2 eq nh3 ax scn       | data | -12             | -14     | -15.7  | -17.3   | -18.8 | -20.1 | -21.4  |
|                          | pred | -11             | -12.9   | -14.7  | -16.7   | -19.1 | -21.9 | -24.9  |
| cr 2 eq ox ax ox         | data | 8.53            | 5.44    | 2.32   | -0.786  | -3.89 | -6.92 | -9.9   |
|                          | pred | 4.47            | 2.89    | 0.835  | -1.65   | -4.57 | -7.76 | -10.8  |
| cr 2 eq h2o ax h2o       | data | -14.5           | -11.8   | -13.5  | -15.1   | -19.1 | -20   | -21    |
|                          | pred | -8.05           | -9.85   | -11.4  | -13     | -14.5 | -16.1 | -18.2  |
| cr 2 eq cn ax h2o        | data | 19.2            | 18.5    | 17.8   | 16.9    | 15.9  | 14.9  | 13.8   |
|                          | pred | 16.6            | 16.4    | 16.3   | 16      | 15.5  | 14.5  | 11.8   |
| cr 2 eq pisc ax ncs      | data | -               | 37.8    | 32.9   | 28.1    | 23.5  | 19.1  | 9.71   |
|                          | pred | -               | 30.5    | 25.5   | 20.1    | 14    | 7.89  | 0.0285 |
| cr 2 eq acac ax acac     | data | 3.66            | -0.746  | -4.83  | -8.78   | -15.9 | -18.4 | -20.4  |
|                          | pred | 1.43            | 0.00453 | -2.61  | -6.79   | -10.8 | -14.2 | -17.6  |
| cr 2 eq bipy ax h2o      | data | -6.42           | -9.51   | -12.3  | -14.9   | -17.2 | -19.3 | -21.1  |
|                          | pred | -5.37           | -6.85   | -8.14  | -9.69   | -11.9 | -14.8 | -17.7  |
| cr 2 eq nh3 ax nh3       | data | -10.2           | -11.6   | -13    | -14.3   | -17   | -18.1 | -17.8  |
|                          | pred | -6.81           | -9.52   | -11.4  | -12.8   | -14.3 | -16.2 | -19.1  |
| cr 2 eq co ax co         | data | 22.6            | 17.7    | 13.2   | 8.78    | 4.68  | 0.866 | -2.66  |
|                          | pred | 21.1            | 17      | 13     | 9.44    | 6.42  | 3.68  | 0.934  |
| cr 2 eq c2h3ns ax c2h3ns | data | 31              | 26.5    | 22.2   | 18.1    | 14.1  | 10.4  | 6.8    |
|                          | pred | 31.3            | 28.4    | 24.5   | 19.9    | 14.9  | 9.81  | 4.93   |
| cr 2 eq phen ax phen     | data | 12.2            | 8.25    | 4.51   | 0.864   | -2.53 | -5.63 | -8.32  |
|                          | pred | 5.99            | 0.882   | -2.44  | -4.63   | -6.54 | -8.34 | -10.1  |
| cr 2 eq tbuc ax nh3      | data | -11.8           | -14.1   | -16.5  | -18.7   | -21   | -23.1 | -25.2  |
|                          | pred | -11.2           | -12.5   | -13.7  | -15.2   | -17.4 | -20.1 | -22.6  |
| cr 2 eq nh3 ax cn        | data | -2.14           | -4.47   | -6.65  | -8.69   | -10.6 | -12.4 | -15.2  |
|                          | pred | 0.612           | -2.48   | -5.21  | -7.28   | -8.86 | -10.9 | -14    |
| cr 3 eq c2h3ns ax c2h3ns | data | -18.7           | -20     | -21.2  | -22.3   | -23.4 | -24.3 | -25.3  |
|                          | pred | -15.5           | -17.7   | -19.1  | -20.3   | -21.5 | -22.5 | -23.1  |
| cr 3 eq acac ax acac     | data | -20             | -21.2   | -22.2  | -23.2   | -24.1 | -24.9 | -25.8  |
|                          | pred | -10.1           | -14.4   | -16.8  | -17.8   | -18.5 | -19.2 | -20    |
| cr 3 eq h2o ax scn       | data | -19.2           | -20.5   | -21.6  | -22.8   | -23.9 | -25.5 | -26.5  |
|                          | pred | -17.3           | -20.2   | -21.7  | -22.7   | -23.5 | -24   | -24.4  |
| cr 3 eq en ax nh3        | data | -23.9           | -24.6   | -25.2  | -25.8   | -26.5 | -27.1 | -27.7  |
|                          | pred | -20.4           | -21.7   | -22.4  | -22.9   | -23.3 | -23.7 | -24.2  |
| cr 3 eq scn ax scn       | data | -21.4           | -22.8   | -24    | -25.2   | -26.2 | -27.2 | -28.1  |
|                          | pred | -17.3           | -19.3   | -20.3  | -21.3   | -22.6 | -24.4 | -26.4  |
| cr 3 eq en ax en         | data | -23.2           | -23.9   | -24.7  | -25.4   | -26.1 | -26.8 | -27.5  |
|                          | pred | -22.2           | -22.5   | -22.7  | -22.9   | -23   | -23.2 | -23.4  |
| cr 3 eq cn ax cn         | data | -19.5           | -20.7   | -21.8  | -22.8   | -23.8 | -24.7 | -25.6  |
|                          | pred | -13.8           | -15.1   | -16.3  | -17.4   | -18.9 | -20.5 | -22    |
| cr 3 eq cn ax ncs        | data | -19.2           | -20.5   | -21.7  | -22.8   | -23.8 | -24.8 | -25.7  |
|                          | pred | -13.6           | -17     | -19.8  | -21.8   | -23.7 | -26.3 | -28.5  |
| cr 3 eq tbuc ax tbuc     | data | -               | -       | -21.9  | -22.8   | -23.7 | -24.6 | -25.4  |
|                          | pred | -               | -       | -21.3  | -21.8   | -22.1 | -22.6 | -23.4  |
| cr 3 eq ncs ax ncs       | data | -17.2           | -18.6   | -20    | -21.2   | -22.4 | -23.5 | -24.5  |
|                          | pred | -14.6           | -15.5   | -16.5  | -17.6   | -18.9 | -20.2 | -21.4  |
| cr 3 eq ox ax ox         | data | -20.7           | -21.6   | -22.5  | -23.3   | -24.2 | -24.9 | -25.7  |
|                          | pred | -18             | -19.2   | -20.3  | -21.2   | -21.7 | -22   | -22.5  |
| cr 3 eq cl ax cl         | data | -12.5           | -13.9   | -15.3  | -16.5   | -17.6 | -18.5 | -19.3  |
|                          | pred | -12.7           | -14     | -15.8  | -17.5   | -19.4 | -21.4 | -23.4  |
| cr 3 eq co ax co         | data | -21.5           | -22.6   | -23.5  | -24.4   | -25.3 | -26.1 | -26.9  |

| name                     | type | aHF    |       |        |        |        |        |        |
|--------------------------|------|--------|-------|--------|--------|--------|--------|--------|
|                          |      | 0.00   | 0.05  | 0.1    | 0.15   | 0.20   | 0.25   | 0.30   |
|                          | pred | -16.7  | -18.6 | -19.6  | -20.4  | -21    | -21.5  | -21.9  |
| cr 3 eq h2o ax co        | data | -18.2  | -19.6 | -20.8  | -22    | -23.1  | -24.1  | -25.1  |
|                          | pred | -15.6  | -16.8 | -17.7  | -18.5  | -19.2  | -19.8  | -20.3  |
| cr 3 eq bipy ax bipy     | data | -21.4  | -22.4 | -23.3  | -24.1  | -24.8  | -25.6  | -26.3  |
|                          | pred | -15.9  | -18.7 | -20.2  | -21    | -21.5  | -21.9  | -22.2  |
| cr 3 eq ncs ax cl        | data | -18.8  | -20.5 | -21.6  | -22.7  | -23.7  | -24.7  | -25.7  |
|                          | pred | -19.7  | -21.3 | -22.6  | -23.5  | -24.1  | -24.5  | -24.9  |
| cr 3 eq tbuc ax pisc     | data | -5.9   | -9.35 | -12.8  | -15.9  | -15.1  | -20.3  | -21.9  |
|                          | pred | -8.48  | -10.2 | -12    | -13.7  | -15.2  | -16.6  | -17.9  |
| cr 3 eq ox ax cl         | data | -20.4  | -21.3 | -22.2  | -23    | -23.8  | -24.5  | -25.3  |
|                          | pred | -16.9  | -18.4 | -19.9  | -21.4  | -22.4  | -23.1  | -23.5  |
| cr 3 eq h2o ax h2o       | data | -21.2  | -22.1 | -23.1  | -24    | -24.8  | -25.7  | -26.5  |
|                          | pred | -17.9  | -18.7 | -19.4  | -20.1  | -20.8  | -21.5  | -22.1  |
| cr 3 eq ox ax pisc       | data | -12.4  | -12.1 | -14.4  | -16.9  | -18.4  | -19.8  | -21    |
|                          | pred | -7.49  | -10.1 | -12.1  | -13.8  | -15.6  | -17    | -18.2  |
| mn 2 eq acac ax nh3      | data | -4.7   | -12.8 | -20.1  | -26.6  | -31.7  | -36.3  | -40.3  |
|                          | pred | -5.43  | -11.8 | -19.4  | -24.8  | -29.1  | -32.9  | -37.1  |
| mn 2 eq nh3 ax nh3       | data | -21.4  | -25.4 | -28.9  | -32.6  | -36    | -39.3  | -42.5  |
|                          | pred | -16.6  | -21.8 | -27.2  | -31.9  | -35.7  | -38.9  | -40.9  |
| mn 2 eq co ax co         | data | 29.5   | 19.7  | 10.5   | 1.68   | -6.57  | -14.3  | -21.4  |
|                          | pred | 24     | 18.8  | 11.8   | 2.64   | -5.38  | -10.2  | -14.2  |
| mn 2 eq cn ax nh3        | data | -3.47  | 0.938 | -5.6   | -11.7  | -17.4  | -22.7  | -27.6  |
|                          | pred | 0.733  | -3    | -6.64  | -11.1  | -15.4  | -19.2  | -23.5  |
| mn 2 eq en ax en         | data | -15.7  | -20.1 | -24.3  | -28.3  | -32.1  | -38.2  | -39    |
|                          | pred | -15.5  | -20.1 | -23.9  | -27.2  | -30    | -32.7  | -35.3  |
| mn 2 eq acac ax acac     | data | -10.1  | -18.6 | -25    | -30.6  | -35.5  | -39.9  | -43.9  |
|                          | pred | -12.7  | -16.9 | -21.5  | -26.4  | -31.1  | -34.8  | -37.8  |
| mn 2 eq en ax cn         | data | 3.26   | -2.16 | -7.31  | -12.2  | -16.8  | -22.7  | -28.6  |
|                          | pred | 8.53   | 1.06  | -6.33  | -13    | -19.7  | -25.8  | -29.6  |
| mn 2 eq bipy ax h2o      | data | -14.6  | -20.3 | -25.5  | -30.2  | -34.5  | -38.5  | -42.1  |
|                          | pred | -15.6  | -21.3 | -26.9  | -31.7  | -35.2  | -37.4  | -39.1  |
| mn 2 eq h2o ax h2o       | data | -35.2  | -38.8 | -42.1  | -45.4  | -48.2  | -50.8  | -53.3  |
|                          | pred | -30.8  | -34.3 | -37.4  | -40.4  | -43.1  | -45    | -46.2  |
| mn 2 eq ncs ax nh3       | data | -12.4  | -18   | -23.1  | -25.4  | -29.9  | -33.9  | -37.8  |
|                          | pred | -13.1  | -20   | -24    | -26.7  | -29.6  | -32.4  | -35.1  |
| mn 2 eq bipy ax bipy     | data | 4.7    | -2.95 | -9.9   | -16.2  | -21.9  | -27    | -31.6  |
|                          | pred | 0.523  | -3.75 | -9.54  | -15.7  | -20.3  | -24.3  | -28.1  |
| mn 2 eq ox ax ox         | data | -33.9  | -40.1 | -45    | -49.1  | -51.7  | -      | -      |
|                          | pred | -35.4  | -41.7 | -45.4  | -47.3  | -48.5  | -      | -      |
| mn 2 eq c2h3ns ax c2h3ns | data | 43.7   | 34.5  | 25.6   | 17.2   | 9.17   | 1.6    | -5.51  |
|                          | pred | 39.5   | 32.2  | 25.4   | 16.5   | 6.17   | -0.402 | -5.2   |
| mn 2 eq ncs ax co        | data | 27.7   | 18.7  | 9.92   | 1.59   | -6.26  | -13.6  | -20.5  |
|                          | pred | 21.9   | 17.4  | 9.61   | 1.72   | -5.24  | -12.3  | -16.9  |
| mn 2 eq ncs ax ncs       | data | -25.9  | -32   | -37.4  | -42.4  | -46.8  | -50.8  | -54.2  |
|                          | pred | -24    | -30   | -35.1  | -38.9  | -41.8  | -44.5  | -47.1  |
| mn 2 eq phen ax phen     | data | 3.97   | -3.6  | -10.5  | -16.7  | -22.3  | -27.3  | -31.8  |
|                          | pred | -1.38  | -7.37 | -14.1  | -19.2  | -23.5  | -27    | -29.9  |
| mn 2 eq nh3 ax co        | data | 15.5   | 7.04  | -1.01  | -8.61  | -15.7  | -22.4  | -28.5  |
|                          | pred | 12.8   | 6.28  | 0.325  | -7.14  | -14.5  | -20    | -23.8  |
| mn 2 eq en ax h2o        | data | -23.8  | -27.4 | -30.8  | -34.2  | -37.3  | -40.3  | -43.2  |
|                          | pred | -20.4  | -25.3 | -30.6  | -35    | -37.8  | -39.7  | -41.4  |
| mn 2 eq en ax co         | data | 24.8   | 15.9  | 7.43   | -0.592 | -8.16  | -15.3  | -21.9  |
|                          | pred | 21.2   | 15.3  | 6.96   | -1.33  | -8.26  | -14.6  | -20.8  |
| mn 2 eq nh3 ax pisc      | data | 4.37   | -2.39 | -8.82  | -14.9  | -20.6  | -25.8  | -30.6  |
|                          | pred | 2.92   | -2.32 | -8.51  | -15.5  | -23.2  | -28.4  | -32.7  |
| mn 3 eq en ax co         | data | 1.61   | -3.86 | -6.11  | -9.5   | -14.1  | -15.5  | -18.2  |
|                          | pred | 2.03   | -3.08 | -6.09  | -8.05  | -9.53  | -10.8  | -12    |
| mn 3 eq phen ax cl       | data | 1.51   | -1.15 | -3.57  | -5.85  | -8.03  | -10.6  | -12.2  |
|                          | pred | -3.49  | -4.15 | -5.02  | -6.44  | -8.3   | -9.99  | -11.3  |
| mn 3 eq phen ax phen     | data | 10     | 7.49  | 5.17   | 2.92   | 0.823  | -1.16  | -3.08  |
|                          | pred | 7.47   | 5.32  | 3.61   | 1.77   | -0.2   | -2.13  | -3.99  |
| mn 3 eq cn ax nh3        | data | 5.43   | 3.11  | 0.654  | -1.68  | -3.95  | -6.12  | -8.21  |
|                          | pred | 7.77   | 3.6   | 0.791  | -1.48  | -3.27  | -4.56  | -5.58  |
| mn 3 eq pisc ax pisc     | data | 41.1   | 35.9  | 30.8   | 26     | 21.7   | 17.7   | 14.1   |
|                          | pred | 37.4   | 34.9  | 30.6   | 25.7   | 23.2   | 21.5   | 19.4   |
| mn 3 eq ncs ax cl        | data | -1.42  | -4.14 | -6.69  | -9.08  | -11.4  | -13.5  | -15.6  |
|                          | pred | -3.51  | -4.94 | -6.59  | -8.58  | -10.9  | -13    | -14.6  |
| mn 3 eq h2o ax co        | data | 2.61   | 0.268 | -2.03  | -4.21  | -6.34  | -8.39  | -10.4  |
|                          | pred | 5.39   | 2.42  | -0.819 | -3.66  | -5.99  | -7.96  | -9.77  |
| mn 3 eq ox ax ox         | data | -3.68  | -5.71 | -7.44  | -9.07  | -10.6  | -12.2  | -13.7  |
|                          | pred | -3.51  | -4.11 | -5.14  | -7.28  | -10.2  | -13.4  | -17.1  |
| mn 3 eq co ax co         | data | 17.1   | 13.7  | 10.4   | 7.39   | 4.55   | 1.84   | -0.719 |
|                          | pred | 17.3   | 14.8  | 12.1   | 9.32   | 7.06   | 5.26   | 3.76   |
| mn 3 eq acac ax acac     | data | 2.92   | 0.269 | -2.31  | -4.3   | -6.33  | -8.23  | -10.1  |
|                          | pred | 2.49   | 0.145 | -1.63  | -2.81  | -3.89  | -5.14  | -6.8   |
| mn 3 eq nh3 ax nh3       | data | 2.3    | 0.504 | -1.46  | -3.21  | -4.95  | -6.66  | -8.38  |
|                          | pred | 2.89   | 1.01  | -0.523 | -2.06  | -3.95  | -6.09  | -8.09  |
| mn 3 eq nh3 ax co        | data | 0.0138 | -3.5  | -6.74  | -9.76  | -12.5  | -15.2  | -17.6  |
|                          | pred | 4.27   | 1.18  | -1.99  | -4.59  | -6.65  | -8.49  | -10.1  |
| mn 3 eq cn ax cn         | data | 22     | 18.5  | 15.2   | 12.1   | 9.18   | 9.18   | 6.52   |
|                          | pred | 21.8   | 19.3  | 16.6   | 13.9   | 11.3   | 9.12   | 7.06   |
| mn 3 eq nh3 ax scn       | data | -16.5  | -18.1 | -19.6  | -21.3  | -23.1  | -24.9  | -26.7  |
|                          | pred | -14.4  | -17   | -19.6  | -21.7  | -23.6  | -25.9  | -28.9  |
| mn 3 eq bipy ax bipy     | data | 8.54   | 6.05  | 3.71   | 1.55   | -0.452 | -2.38  | -4.22  |
|                          | pred | 10     | 6.76  | 4.65   | 2.89   | 1.13   | -0.754 | -2.82  |
| mn 3 eq h2o ax pisc      | data | -8     | -14.7 | -21.2  | -31.5  | -36.5  | -41    | -      |
|                          | pred | -6.24  | -13.3 | -20.7  | -25.2  | -27.4  | -28.6  | -      |
| mn 3 eq en ax en         | data | 3.7    | 1.92  | 0.149  | -1.72  | -3.42  | -5.11  | -6.75  |
|                          | pred | 3.89   | 1.54  | -1.02  | -2.83  | -4.02  | -4.94  | -5.86  |

| name                     | type | aHF    |        |        |        |       |        |         |
|--------------------------|------|--------|--------|--------|--------|-------|--------|---------|
|                          |      | 0.00   | 0.05   | 0.1    | 0.15   | 0.20  | 0.25   | 0.30    |
| mn 3 eq phen ax nh3      | data | -1.37  | -3.2   | -5.05  | -6.89  | -8.72 | -10.5  | -12.3   |
|                          | pred | 1.99   | -1.46  | -3.93  | -5.6   | -6.81 | -7.76  | -8.61   |
| mn 3 eq h2o ax h2o       | data | -5.06  | -6.61  | -8.16  | -9.71  | -11.3 | -12.8  | -14.3   |
|                          | pred | -4.55  | -5.59  | -6.52  | -7.69  | -9.32 | -11.4  | -13.7   |
| mn 3 eq c2h3ns ax c2h3ns | data | 28.9   | 25.3   | 21.9   | 18.7   | 15.7  | 12.8   | 10.1    |
|                          | pred | 26.7   | 22.2   | 19.4   | 16.8   | 14    | 10.8   | 7.61    |
| fe 2 eq co ax co         | data | 66.7   | 57.1   | 47.8   | 38.8   | 30.3  | 22.2   | 14.5    |
|                          | pred | 60.4   | 53.8   | 45.4   | 37.5   | 29    | 21.2   | 15.4    |
| fe 2 eq acac ax acac     | data | 8.06   | 2.18   | -3.18  | -8.1   | -20   | -23.5  | -23.7   |
|                          | pred | 3.11   | -0.278 | -4.38  | -9.21  | -14.3 | -19.4  | -24.9   |
| fe 2 eq tbuc ax co       | data | 14.6   | 10.3   | 5.78   | 1.88   | -3.22 | -8.37  | -4.03   |
|                          | pred | 16.7   | 11     | 5.37   | 0.76   | -3.93 | -8.83  | -13.9   |
| fe 2 eq cn ax cn         | data | 36.6   | 27.5   | 18.8   | 10.5   | 2.92  | -4.09  | -10.5   |
|                          | pred | 36.7   | 26.4   | 16.7   | 7.32   | 0.181 | -2.82  | -4.33   |
| fe 2 eq tbuc ax tbuc     | data | -17.6  | -22.2  | -26    | -29.5  | -32.6 | -35.6  | -       |
|                          | pred | -18.9  | -24.4  | -27.8  | -29.5  | -30.4 | -30.9  | -       |
| fe 2 eq h2o ax ncs       | data | -9.37  | -12.1  | -14.7  | -17.3  | -19.9 | -22.5  | -25     |
|                          | pred | -13.8  | -15.4  | -16.6  | -18.4  | -21.4 | -24.7  | -27.5   |
| fe 2 eq en ax en         | data | 10.5   | 6.41   | 2.41   | -1.39  | -5.03 | -8.5   | -11.8   |
|                          | pred | 9.48   | 3.75   | -0.159 | -3.37  | -7.38 | -10.3  | -13.3   |
| fe 2 eq cl ax pisc       | data | 15.9   | 10.6   | 5.14   | -0.496 | -6.23 | -13.4  | -18.8   |
|                          | pred | 16.7   | 12.7   | 8.18   | 2.66   | -4.36 | -10.8  | -15     |
| fe 2 eq ncs ax h2o       | data | -6.22  | -9.95  | -13.6  | -17.6  | -20.9 | -23.9  | -26.8   |
|                          | pred | -7.85  | -11.6  | -15.7  | -20.1  | -23.3 | -26.2  | -29     |
| fe 2 eq pisc ax cl       | data | 47.2   | 40.6   | 33.8   | 27     | 20.3  | 13.8   | 7.51    |
|                          | pred | 44.6   | 36.1   | 30.1   | 24.6   | 17.8  | 12     | 7.84    |
| fe 2 eq phen ax phen     | data | 27.5   | 21     | 15.1   | 9.58   | 1.73  | -2.67  | -7.04   |
|                          | pred | 18.4   | 13.9   | 9.73   | 5.14   | 0.668 | -3.22  | -7.89   |
| fe 2 eq scn ax h2o       | data | -5.53  | -8.55  | -11.6  | -14.8  | -17.9 | -17.3  | -20.5   |
|                          | pred | -6.56  | -8.09  | -9.57  | -11.2  | -13.3 | -16    | -18.6   |
| fe 2 eq nh3 ax nh3       | data | 3.93   | 0.0674 | -3.64  | -7.18  | -10.6 | -13.8  | -16.5   |
|                          | pred | 2.23   | -2.84  | -6.52  | -10    | -12.8 | -14.5  | -15.9   |
| fe 2 eq c2h3ns ax c2h3ns | data | 75.1   | 66.6   | 58.2   | 50.2   | 42.2  | 34.4   | 27.2    |
|                          | pred | 69.8   | 64.8   | 57.8   | 49.3   | 40.1  | 32.8   | 26.3    |
| fe 2 eq ox ax pisc       | data | 28.8   | 22.9   | 17     | 11.3   | 5.53  | -0.106 | -8.43   |
|                          | pred | 22.4   | 19.4   | 15     | 8.85   | 1.78  | -4.02  | -9.1    |
| fe 2 eq pisc ax cn       | data | 81.2   | 73.2   | 65.8   | 57.4   | 57.4  | 41     | 33.2    |
|                          | pred | 69.1   | 67     | 64.7   | 60.3   | 51    | 38.9   | 30.4    |
| fe 2 eq acac ax cn       | data | 16.2   | 9.91   | 4.21   | -1.67  | -4.58 | -11.6  | -14.9   |
|                          | pred | 12.8   | 7.53   | 1.76   | -3.31  | -8.46 | -13.4  | -16.2   |
| fe 2 eq ox ax ox         | data | -13.7  | -18.6  | -22.7  | -26.4  | -29.8 | -33    | -35.9   |
|                          | pred | -18.5  | -21.9  | -25.2  | -27.4  | -28.6 | -29.2  | -29.7   |
| fe 2 eq h2o ax h2o       | data | -14    | -16.9  | -20.1  | -23.1  | -26.1 | -28.9  | -31.5   |
|                          | pred | -11.4  | -16.5  | -21.1  | -23.8  | -25.7 | -27.4  | -29.1   |
| fe 2 eq ncs ax pisc      | data | 20.3   | 15     | 9.12   | 3.37   | -1.55 | -      | -4.39   |
|                          | pred | 14.4   | 10.6   | 6.23   | 1.36   | -2.84 | -      | -9.89   |
| fe 2 eq en ax co         | data | 41.2   | 33.5   | 25.9   | 18.6   | 11.6  | 5.18   | -0.805  |
|                          | pred | 35.4   | 29.8   | 23     | 16.7   | 11.8  | 6.1    | -0.0024 |
| fe 2 eq pisc ax ncs      | data | 47.6   | 33.4   | 27.6   | 21.5   | 17.4  | 11.3   | 5.4     |
|                          | pred | 33.2   | 29.3   | 23.3   | 17.5   | 12.1  | 6.57   | 2.24    |
| fe 2 eq ncs ax co        | data | 28.3   | 23.2   | 17.6   | 11.8   | 5.85  | 0.102  | -5.36   |
|                          | pred | 29.9   | 22.1   | 14.8   | 10.1   | 6.06  | 1.72   | -2.7    |
| fe 2 eq ncs ax ncs       | data | -1.72  | -6.89  | -11.7  | -16.2  | -20.3 | -24.2  | -27.7   |
|                          | pred | -5.55  | -9.9   | -14.1  | -18    | -21.9 | -25.7  | -28.3   |
| fe 3 eq tbuc ax tbuc     | data | -7.95  | -11.1  | -14.1  | -17.2  | -20.2 | -23.2  | -26.3   |
|                          | pred | -7.56  | -10.7  | -13.3  | -15.9  | -18.4 | -20.7  | -22.9   |
| fe 3 eq cn ax cn         | data | 57.9   | 51.8   | 46     | 40.3   | 34.8  | 29.4   | 24.2    |
|                          | pred | 54.6   | 49.7   | 45.7   | 41.7   | 36.3  | 28.9   | 19.5    |
| fe 3 eq acac ax acac     | data | 8.94   | 5.47   | 2.02   | -1.45  | -4.97 | -8.55  | -12.2   |
|                          | pred | 6.45   | 3.35   | 0.96   | -0.856 | -2.91 | -5.33  | -7.55   |
| fe 3 eq porphyrin ax h2o | data | 18.7   | 15.3   | 12.1   | 8.76   | -1.43 | 3.11   | 0.871   |
|                          | pred | 19.3   | 14.8   | 9.89   | 4.73   | 0.907 | -1.44  | -3.15   |
| fe 3 eq h2o ax cn        | data | 14.7   | 11.6   | 8.5    | 5.36   | 2.1   | 2.78   | -0.841  |
|                          | pred | 13.5   | 9.08   | 6.51   | 4.84   | 3.29  | 1.46   | -0.922  |
| fe 3 eq porphyrin ax cn  | data | 44.8   | 39.8   | 35     | 31.7   | 27    | 22.4   | 17      |
|                          | pred | 38.8   | 36.8   | 34     | 30.1   | 25.5  | 20.6   | 16.2    |
| fe 3 eq co ax co         | data | 43.4   | 37.2   | 31.2   | 25.5   | 20    | 14.7   | 9.5     |
|                          | pred | 45.5   | 36.8   | 30.4   | 24.7   | 19.3  | 15.1   | 12.2    |
| fe 3 eq ox ax ox         | data | 2.6    | -0.574 | -3.78  | -7.03  | -10.3 | -13.7  | -17.1   |
|                          | pred | 2.68   | -0.701 | -4.73  | -8.16  | -11.4 | -14.6  | -17.8   |
| fe 3 eq pisc ax h2o      | data | 28.9   | 24.6   | 17.1   | 15     | 9.63  | 2.92   | -1.87   |
|                          | pred | 30.3   | 24.9   | 19.3   | 14.2   | 8.24  | 3.5    | 0.317   |
| fe 3 eq acac ax cl       | data | 1.11   | -7.09  | -10.2  | -16    | -16.2 | -15    | -18.2   |
|                          | pred | -6.49  | -7.3   | -8.33  | -9.96  | -12   | -14.2  | -16.3   |
| fe 3 eq ox ax ncs        | data | 8.73   | 4.93   | 1.26   | -2.36  | -5.81 | -9.44  | -13.1   |
|                          | pred | 3.56   | 2.05   | 0.0278 | -2.94  | -6.08 | -9.38  | -13.4   |
| fe 3 eq en ax en         | data | 22.7   | 19.6   | 16.3   | 10.2   | 9.6   | 6.1    | 2.56    |
|                          | pred | 18.8   | 15.4   | 12.2   | 9.55   | 6.96  | 4.6    | 2.45    |
| fe 3 eq pisc ax pisc     | data | 65.5   | 61.4   | 54.9   | 49.5   | 40.8  | 34.4   | 26.1    |
|                          | pred | 59.1   | 56.7   | 52.9   | 46.3   | 38.7  | 31.9   | 27.3    |
| fe 3 eq bipy ax co       | data | 29.7   | 23.9   | 16.7   | 10.1   | 3.55  | -2.55  | -16.9   |
|                          | pred | 29.9   | 24.7   | 19     | 11.9   | 4.95  | -2.21  | -8.63   |
| fe 3 eq pisc ax ncs      | data | 41.5   | 42.5   | 32.3   | 26.5   | 27.2  | 20.4   | 13.9    |
|                          | pred | 38.4   | 32.2   | 27.8   | 24.8   | 22.1  | 18.2   | 12.9    |
| fe 3 eq ncs ax cl        | data | 1.61   | -1.64  | -10.5  | -13.5  | -16.5 | -19.5  | -22.7   |
|                          | pred | -0.111 | -3.99  | -8.3   | -12.5  | -15.8 | -18.3  | -20.4   |
| fe 3 eq phen ax phen     | data | 28.6   | 25.2   | 21.7   | 14.7   | 11    | 7.17   | 3.21    |
|                          | pred | 24.8   | 22.9   | 19.7   | 15.5   | 11.3  | 7.49   | 4.24    |

| name                     | type | aHF    |        |        |        |        |        |       |
|--------------------------|------|--------|--------|--------|--------|--------|--------|-------|
|                          |      | 0.00   | 0.05   | 0.1    | 0.15   | 0.20   | 0.25   | 0.30  |
| fe 3 eq h2o ax h2o       | data | -15.6  | -18    | -21    | -23.4  | -26    | -28.7  | -31.6 |
|                          | pred | -9.04  | -13.4  | -17    | -19.1  | -20.6  | -22.3  | -24.4 |
| fe 3 eq cl ax cl         | data | -13.9  | -16.6  | -26.3  | -22.4  | -25.5  | -28.7  | -38.6 |
|                          | pred | -9.3   | -13.4  | -17.3  | -21.9  | -26.6  | -30.2  | -32.4 |
| fe 3 eq pisc ax cl       | data | 39.1   | 34.1   | 35.7   | 30.7   | 25.8   | 21.1   | 16.5  |
|                          | pred | 38     | 34.8   | 31.8   | 29.2   | 26.4   | 22.3   | 17.4  |
| fe 3 eq c2h3ns ax c2h3ns | data | 60.6   | 54.7   | 48.9   | 43.2   | 37.7   | 32.3   | 27    |
|                          | pred | 62.1   | 55.4   | 47.4   | 41.9   | 36.9   | 31.7   | 27.6  |
| fe 3 eq nh3 ax scn       | data | 20.7   | 17.2   | 13.9   | 10.7   | 7.65   | 4.53   | 1.13  |
|                          | pred | 13.2   | 11.6   | 9.86   | 7.93   | 5.56   | 2.32   | -2.12 |
| fe 3 eq acac ax ncs      | data | -6.13  | -9.36  | -12.4  | -15.4  | -18.3  | -21.1  | -23.9 |
|                          | pred | -5.44  | -9.91  | -12.7  | -14.3  | -15.4  | -16.1  | -16.7 |
| fe 3 eq co ax scn        | data | -      | -      | -8.39  | -12.8  | -17.3  | -21.9  | -26.4 |
|                          | pred | -      | -      | -10.9  | -15.3  | -18.3  | -21    | -23.7 |
| fe 3 eq bipy ax bipy     | data | 29.7   | 29.4   | 25.3   | 21.1   | 16.9   | 12.7   | 8.53  |
|                          | pred | 25.3   | 23.9   | 21.4   | 17.7   | 13.7   | 9.78   | 5.89  |
| fe 3 eq ncs ax cn        | data | 19.9   | 16     | 12.2   | 8.44   | 4.74   | 1.02   | -2.73 |
|                          | pred | 20.2   | 15.9   | 12.1   | 8.41   | 4.56   | 1.19   | -1.98 |
| fe 3 eq ncs ax ncs       | data | 0.0285 | -3.24  | -6.41  | -9.52  | -12.6  | -15.7  | -18.8 |
|                          | pred | -2.02  | -6.27  | -9.38  | -11.6  | -13.2  | -14.5  | -15.9 |
| fe 3 eq nh3 ax nh3       | data | 21     | 17.2   | 13.4   | 9.59   | 5.8    | 2.03   | -1.73 |
|                          | pred | 19.2   | 15.6   | 12.3   | 8.96   | 5.6    | 1.78   | -3.37 |
| fe 3 eq cl ax pisc       | data | 20.2   | 15.1   | 10.3   | 5.6    | 4.97   | 0.215  | -4.42 |
|                          | pred | 19.1   | 15.6   | 10.9   | 5.82   | 2.28   | 0.0921 | -1.74 |
| co 2 eq ox ax ox         | data | -9.29  | -12.1  | -14.4  | -16.5  | -18.5  | -20.3  | -22   |
|                          | pred | -13.1  | -14.5  | -16.3  | -18.3  | -20.2  | -21.9  | -23.4 |
| co 2 eq en ax en         | data | 3.16   | 0.284  | -2.48  | -5.19  | -7.81  | -10.4  | -12.7 |
|                          | pred | 1.72   | -1.62  | -4.23  | -6.52  | -9.06  | -12.3  | -16.1 |
| co 2 eq tbuc ax tbuc     | data | -11.5  | -13.7  | -15.6  | -17.5  | -19.2  | -20.8  | -22.4 |
|                          | pred | -13.8  | -15.4  | -17.1  | -18.8  | -20.4  | -22    | -23.5 |
| co 2 eq cl ax pisc       | data | 11.5   | 8.82   | 5.5    | 1.8    | -2.05  | -5.91  | -9.65 |
|                          | pred | 11     | 8.74   | 6.3    | 3.46   | 0.241  | -3.54  | -7.66 |
| co 2 eq cn ax h2o        | data | -30.3  | -32.2  | -34.6  | -37.3  | -40.1  | -43    | -46   |
|                          | pred | -24    | -28.8  | -32    | -33.7  | -34.5  | -34.7  | -34.8 |
| co 2 eq en ax pisc       | data | 16.4   | 12.5   | 8.23   | 4.11   | 0.192  | -3.49  | -6.93 |
|                          | pred | 8.45   | 7.32   | 5.99   | 4.04   | 0.65   | -3.56  | -6.03 |
| co 2 eq phen ax h2o      | data | 4.62   | 1.07   | -2.3   | -5.49  | -6.62  | -9.37  | -14.7 |
|                          | pred | 3.97   | 1.33   | -1.55  | -4.37  | -6.51  | -7.96  | -9.16 |
| co 2 eq phen ax phen     | data | 8.28   | 4.41   | 0.79   | -2.61  | -5.77  | -8.74  | -11.5 |
|                          | pred | 5.96   | 1.86   | -1.39  | -4.16  | -6.6   | -9.13  | -12.5 |
| co 2 eq h2o ax ncs       | data | -4.76  | -6.41  | -8.51  | -10.2  | -11.9  | -13.5  | -15   |
|                          | pred | -7.4   | -8.68  | -9.82  | -10.9  | -12    | -13.6  | -16.5 |
| co 2 eq c2h3ns ax c2h3ns | data | 33.5   | 25.4   | 20.3   | 15.4   | 10.6   | 6.15   | 1.91  |
|                          | pred | 32.7   | 25.4   | 19     | 13.6   | 9.01   | 4.8    | 1.71  |
| co 2 eq nh3 ax nh3       | data | 0.576  | -2.17  | -4.44  | -7.45  | -9.97  | -12.3  | -14.4 |
|                          | pred | 0.629  | -1.49  | -4.75  | -8.69  | -11.7  | -13.4  | -14.4 |
| co 2 eq acac ax cn       | data | 12.5   | 8.82   | 5.29   | 1.95   | -0.987 | -3.12  | -6.87 |
|                          | pred | 11.1   | 7.41   | 3.23   | -0.215 | -2.97  | -5.27  | -7.41 |
| co 2 eq nh3 ax h2o       | data | 7.28   | 4.48   | 1.66   | -1.14  | -3.86  | -6.53  | -9.11 |
|                          | pred | 1.72   | -0.547 | -2.54  | -4.16  | -5.73  | -7.47  | -9.44 |
| co 2 eq acac ax acac     | data | -3.04  | -6.6   | -9.73  | -12.5  | -14.9  | -13.2  | -15.4 |
|                          | pred | -7.52  | -10    | -11.9  | -13.3  | -14.2  | -15.1  | -16   |
| co 2 eq ncs ax ncs       | data | -8.26  | -10.8  | -13.2  | -15.4  | -17.4  | -19.2  | -20.9 |
|                          | pred | -11.3  | -14.7  | -17    | -18.2  | -19.2  | -20.5  | -22.6 |
| co 2 eq bipy ax bipy     | data | 8.05   | 4.07   | 0.383  | -3.04  | -6.23  | -9.03  | -11.7 |
|                          | pred | 7.28   | 2.9    | -0.524 | -3.46  | -6.07  | -8.66  | -11.9 |
| co 2 eq co ax co         | data | 28.1   | 22.3   | 16.6   | 11.3   | 6.23   | 1.48   | -5.44 |
|                          | pred | 25.3   | 19.6   | 14.4   | 9.27   | 4.86   | 1.67   | -1.13 |
| co 2 eq en ax h2o        | data | 12.8   | 9.86   | 6.97   | 4.13   | 1.33   | -1.41  | -4.11 |
|                          | pred | 7.53   | 4.81   | 1.61   | -1.61  | -4.29  | -6.41  | -8.35 |
| co 2 eq h2o ax h2o       | data | -11.8  | -14.2  | -16.2  | -18.1  | -19.7  | -21.2  | -22.6 |
|                          | pred | -10.9  | -12.9  | -15.3  | -18.2  | -21.4  | -23.8  | -25.3 |
| co 3 eq co ax nh3        | data | -      | 57.3   | 52.4   | 47.5   | 42.4   | 37.5   | 32.8  |
|                          | pred | -      | 52.4   | 49.3   | 45.6   | 40.9   | 36.2   | 32.4  |
| co 3 eq acac ax nh3      | data | 29.4   | 30.2   | 27.7   | 25.2   | 22.7   | 20.2   | 17.8  |
|                          | pred | 29.8   | 28     | 25.5   | 22.9   | 20.7   | 18.6   | 15.8  |
| co 3 eq tbuc ax pisc     | data | 11.8   | 9.19   | 6.23   | -0.016 | -3.36  | -6.88  | -11.7 |
|                          | pred | 10.2   | 8.16   | 5.98   | 2.95   | -2.19  | -9.67  | -16.3 |
| co 3 eq nh3 ax nh3       | data | 48.2   | 45     | 42.3   | 39.2   | 36.1   | 33     | 30    |
|                          | pred | 46.9   | 42.9   | 39.9   | 37.1   | 33.9   | 30.6   | 26.6  |
| co 3 eq ox ax ox         | data | -4.67  | -7.87  | -11.2  | -14.6  | -15.7  | -21.6  | -26   |
|                          | pred | 0.565  | -1.88  | -5.04  | -8.91  | -12.9  | -16.7  | -20.1 |
| co 3 eq en ax en         | data | 49.6   | 47.7   | 45.4   | 42.8   | 40.1   | 37.3   | 34.4  |
|                          | pred | 46.7   | 43.9   | 40     | 35.4   | 31.2   | 28     | 24.9  |
| co 3 eq acac ax acac     | data | 31.9   | 29.5   | 27.2   | 24.8   | 22.5   | 20.2   | 17.5  |
|                          | pred | 29.3   | 27.4   | 25.4   | 23.1   | 20.4   | 16.7   | 10.5  |
| co 3 eq phen ax phen     | data | 43.2   | 40.5   | 36.5   | 32.6   | 28.7   | 24.7   | 20.9  |
|                          | pred | 48     | 45.7   | 42.7   | 39     | 35.5   | 32.6   | 30.1  |
| co 3 eq cn ax cn         | data | 88.5   | 83.6   | 78.7   | 73.8   | 69.1   | 64.5   | 60    |
|                          | pred | 74.6   | 74     | 72.7   | 70.2   | 65.9   | 59.8   | 51.1  |
| co 3 eq c2h3ns ax c2h3ns | data | 90.7   | 86.9   | 82.7   | 78.2   | 73.7   | 69.1   | 64.6  |
|                          | pred | 74.8   | 74.6   | 74.2   | 72.8   | 69.4   | 63.6   | 56.7  |
| co 3 eq co ax co         | data | 77     | 71.6   | 66.3   | 61.2   | 56.3   | 51.6   | 47    |
|                          | pred | 71.8   | 68.8   | 64     | 59     | 54.5   | 49.9   | 45.1  |
| co 3 eq tbuc ax tbuc     | data | 2.61   | 1.38   | 0.259  | -0.943 | -2.55  | -4.74  | -7.18 |
|                          | pred | 5.13   | 3.38   | 1.48   | -1.26  | -5.64  | -10.7  | -15.6 |
| co 3 eq h2o ax h2o       | data | 6.22   | 5.28   | 4.26   | 3.09   | 1.79   | 0.265  | -1.44 |
|                          | pred | 11.5   | 8.36   | 5.78   | 3.39   | 1.51   | 0.0404 | -1.79 |
| co 3 eq ncs ax ncs       | data | 8.87   | 8.94   | 8.84   | 8.02   | 6.47   | 4.09   | 2.08  |



| name                     | type | aHF   |       |       |        |       |       |       |
|--------------------------|------|-------|-------|-------|--------|-------|-------|-------|
|                          |      | 0.00  | 0.05  | 0.1   | 0.15   | 0.20  | 0.25  | 0.30  |
|                          | pred | 15.6  | 12.6  | 9.55  | 5.42   | 1.15  | -1.67 | -4.04 |
| co 3 eq pisc ax pisc     | data | 47.2  | 46.9  | 43.3  | 39.1   | 34.6  | 30.1  | 25.6  |
|                          | pred | 46.2  | 44.3  | 42.2  | 39.4   | 35.9  | 32.1  | 28.2  |
| co 3 eq bipy ax bipy     | data | 54.4  | 51.8  | 48.7  | 44.7   | 40.6  | 36.6  | 32.7  |
|                          | pred | 48.2  | 45.8  | 42.8  | 39.2   | 35.5  | 32.4  | 29.8  |
| co 3 eq acac ax ncs      | data | 6.48  | 4.32  | 2.33  | -0.259 | -3.87 | -7.95 | -12.2 |
|                          | pred | 7.31  | 4.81  | 2.25  | -0.448 | -3.55 | -6.93 | -10.2 |
| co 3 eq ox ax ncs        | data | 20.5  | 19.2  | 19.4  | 14.8   | 10.2  | 5.84  | 1.61  |
|                          | pred | 21    | 18.3  | 15    | 11.5   | 8.37  | 5.4   | 2.52  |
| co 3 eq acac ax co       | data | 23.7  | 19.6  | 15.8  | 11.5   | 7.16  | 2.7   | -2.3  |
|                          | pred | 18.4  | 16.5  | 14.1  | 11.6   | 9.14  | 6.06  | 2.15  |
| ni 2 eq tbuc ax tbuc     | data | -19.1 | -22.3 | -25.4 | -28.5  | -31.5 | -34.4 | -37.3 |
|                          | pred | -18.2 | -21.8 | -26.8 | -30.8  | -33.2 | -34.9 | -36.3 |
| ni 2 eq bipy ax nh3      | data | -13.2 | -16.4 | -19.2 | -22    | -24.9 | -27.8 | -30.7 |
|                          | pred | -15.4 | -18.3 | -21   | -23.7  | -26.7 | -29.6 | -32   |
| ni 2 eq en ax en         | data | -18.8 | -21.6 | -24.3 | -27.2  | -30   | -32.8 | -35.6 |
|                          | pred | -24.7 | -25.2 | -25.7 | -26.6  | -28.3 | -30.6 | -33   |
| ni 2 eq co ax co         | data | -21   | -24.4 | -27.8 | -31.3  | -34.6 | -37.9 | -41.1 |
|                          | pred | -19.4 | -22.8 | -25.3 | -28    | -31   | -34.3 | -37.4 |
| ni 2 eq nh3 ax nh3       | data | 0.552 | -3.22 | -6.79 | -10.7  | -14.5 | -18.2 | -21   |
|                          | pred | -4.75 | -6.97 | -10   | -13.4  | -16.1 | -18.5 | -21.3 |
| ni 2 eq acac ax cn       | data | -10.3 | -13.4 | -16.5 | -19.5  | -22.5 | -25.4 | -28.2 |
|                          | pred | -9.03 | -12.4 | -16.8 | -21.2  | -23.9 | -25.2 | -26.4 |
| ni 2 eq pisc ax pisc     | data | 2.09  | -1.92 | -6.39 | -10.6  | -14.4 | -18.2 | -21.9 |
|                          | pred | -2.05 | -4.82 | -7.77 | -10.8  | -13.9 | -16.8 | -19.8 |
| ni 2 eq en ax h2o        | data | 1.41  | -1.64 | -4.68 | -7.78  | -10.8 | -13.9 | -17   |
|                          | pred | 3.16  | -1.42 | -6.98 | -11.8  | -14.7 | -16.6 | -18.7 |
| ni 2 eq bipy ax bipy     | data | -17.1 | -20.3 | -23.5 | -26.6  | -29.8 | -32.8 | -35.8 |
|                          | pred | -23.4 | -24.3 | -25   | -25.8  | -27.1 | -28.9 | -31.2 |
| ni 2 eq ncs ax ncs       | data | -32   | -34.9 | -37.8 | -40.5  | -43.1 | -45.6 | -47.9 |
|                          | pred | -30.9 | -33.4 | -36   | -39.6  | -42.4 | -43.9 | -44.6 |
| ni 2 eq cn ax cn         | data | -     | -     | -20.4 | -23.8  | -27.1 | -30.4 | -33.5 |
|                          | pred | -     | -     | -20.5 | -25.5  | -28.8 | -31.3 | -33.8 |
| ni 2 eq acac ax co       | data | -13.3 | -15.4 | -17.8 | -20.5  | -23.3 | -26.1 | -28.8 |
|                          | pred | -12.6 | -14.9 | -17.3 | -20    | -22.5 | -24.7 | -26.7 |
| ni 2 eq c2h3ns ax c2h3ns | data | -19.5 | -22.5 | -25.6 | -28.8  | -32   | -35.1 | -38.1 |
|                          | pred | -18.1 | -22.1 | -25.4 | -28.1  | -30   | -32   | -34.6 |
| ni 2 eq acac ax nh3      | data | -23.5 | -25.9 | -28.4 | -31    | -33.5 | -36.1 | -38.5 |
|                          | pred | -22.4 | -26.5 | -29.5 | -31.9  | -33.8 | -35.4 | -36.7 |
| ni 2 eq acac ax acac     | data | -23.3 | -26.8 | -25.2 | -28.9  | -32.5 | -35.9 | -39.2 |
|                          | pred | -23.4 | -25   | -26.9 | -29.3  | -32.3 | -35   | -37.2 |
| ni 2 eq ox ax ox         | data | -17.5 | -21.2 | -24.8 | -28.6  | -31.9 | -35.1 | -38.2 |
|                          | pred | -17.9 | -20.6 | -24   | -28.2  | -31.8 | -33.9 | -35.3 |

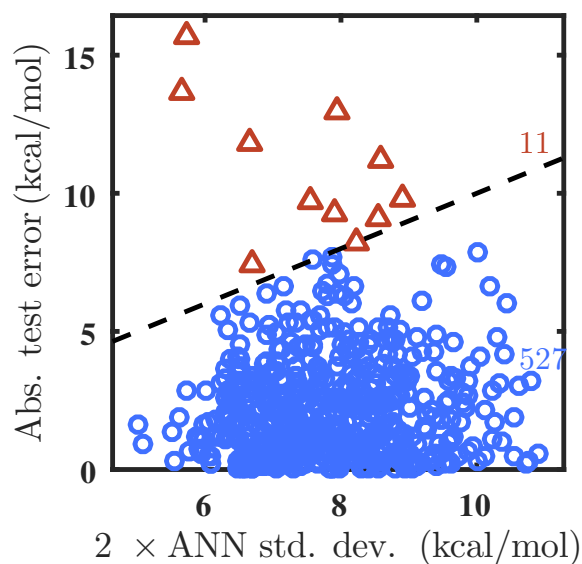

Figure S7: Parity plot for 2 standard deviation from the mean prediction and absolute prediction error for test case  $\Delta E_{H-L}$  prediction using ANN. All units are kcal/mol. The black line is  $y=x$ .

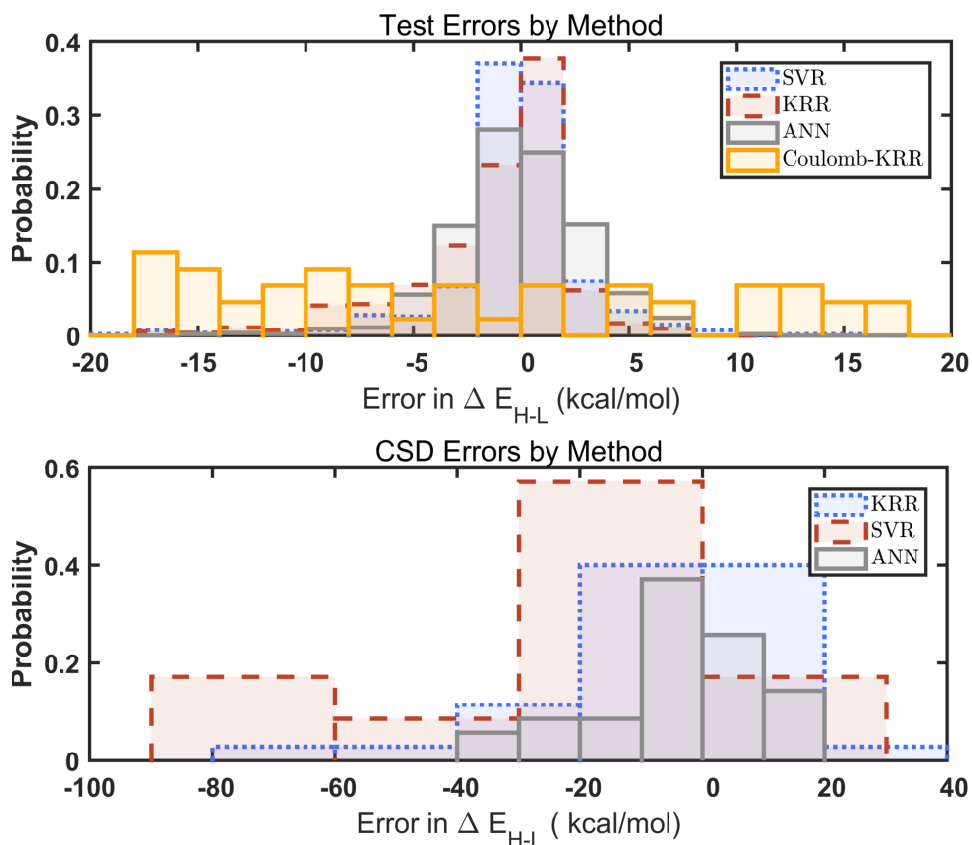

Figure S8: Normalized error histogram for HF = 0.2 (B3LYP) test data (top) and CSD structures (bottom), comparing ANN, KRR and SVR models using descriptor set **g**, as well as a KRR model using the Coulomb matrix descriptor (trained on B3LYP data only.)

Table S24: RMS prediction errors for  $\Delta E_{H-L}$  on test data using a deep ANN in kcal/mol for test data divided by metal and oxidation state. The number of test cases is indicated in parentheses

| Species | RMS Test error | Min. Abs. Test Error | Max. Abs. Test Error |
|---------|----------------|----------------------|----------------------|
| Cr(II)  | 3.3 (86)       | 0.03                 | 11.2                 |
| Cr(III) | 2.5 (50)       | 0.06                 | 6.3                  |
| Mn(II)  | 2.8 (57)       | 0.01                 | 7.5                  |
| Mn(III) | 2.1 (60)       | 0.04                 | 5.6                  |
| Fe(II)  | 3.7 (60)       | 0.07                 | 13.0                 |
| Fe(III) | 3.0 (71)       | 0.09                 | 7.9                  |
| Co(II)  | 2.8 (58)       | 0.07                 | 11.8                 |
| Co(III) | 4.5 (57)       | 0.02                 | 15.7                 |
| Ni(II)  | 2.5 (39)       | 0.09                 | 5.8                  |

Table S25: Average HF exchange sensitivity values, in kcal/mol.HFX, for homoleptic compounds with C, N and O ligands grouped by metal, oxidation state and ligand connecting atom

| Metal | Oxidation state | Ligand connection |     |     |
|-------|-----------------|-------------------|-----|-----|
|       |                 | C                 | N   | O   |
| Cr    | II              | -82               | -55 | -59 |
|       | III             | -20               | -20 | -18 |
| Mn    | II              | -167              | -92 | -87 |
|       | III             | -58               | -44 | -32 |
| Fe    | II              | -164              | -76 | -59 |
|       | III             | -118              | -74 | -63 |
| Co    | II              | -106              | -48 | -45 |
|       | III             | -98               | -53 | -46 |
| Ni    | II              | -65               | -57 | -52 |

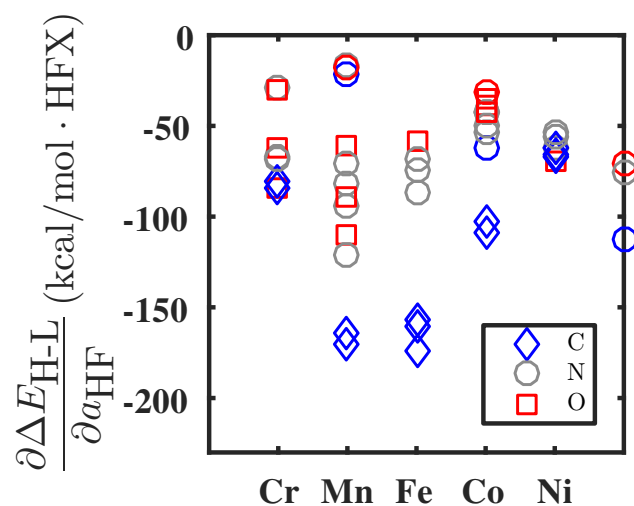

Figure S9: Scatter plot of HFX sensitivity in kcal/mol · HFX for homoleptic M(II) complexes, colored by connection atom, for homoleptic (II) complexes with C (gray), N (blue) and O (square) ligands.

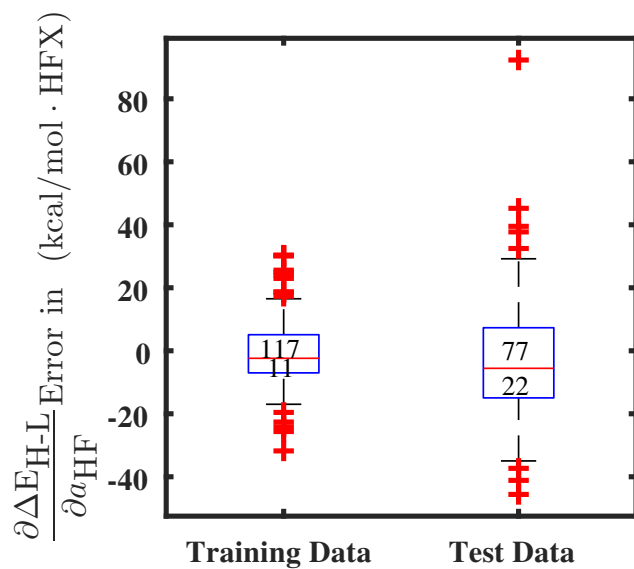

Figure S10: Error boxplot for regression of  $\frac{\partial \Delta E_{\text{H-L}}}{\partial a_{\text{HF}}}$  using an ANN, showing training and test data comparison. The top number indicates the number of trials, while the bottom indicates the RMSE.

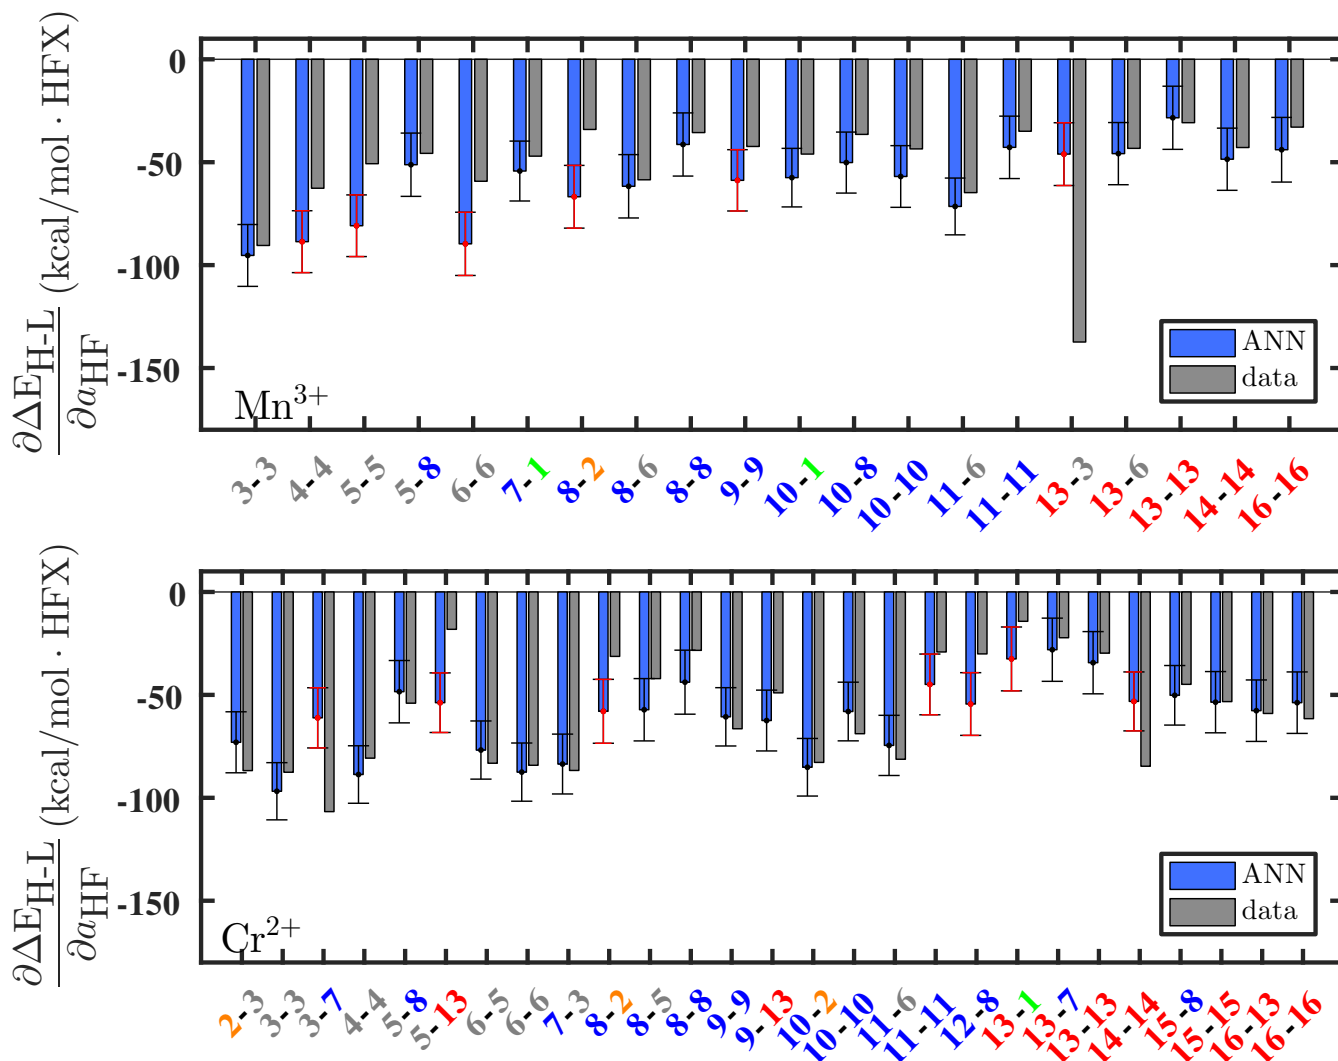

Figure S11: Model predictions of  $\frac{\partial \Delta E_{H-L}}{\partial a_{HF}}$  and data for Co using an ANN. The ligands are described by two numbers indicating the equatorial first and then the axial, color coded by ligand identity (green for halogen, gray for carbon, blue for nitrogen, and red for oxygen). The error bars represent an estimated 1 standard deviation from the mean prediction.

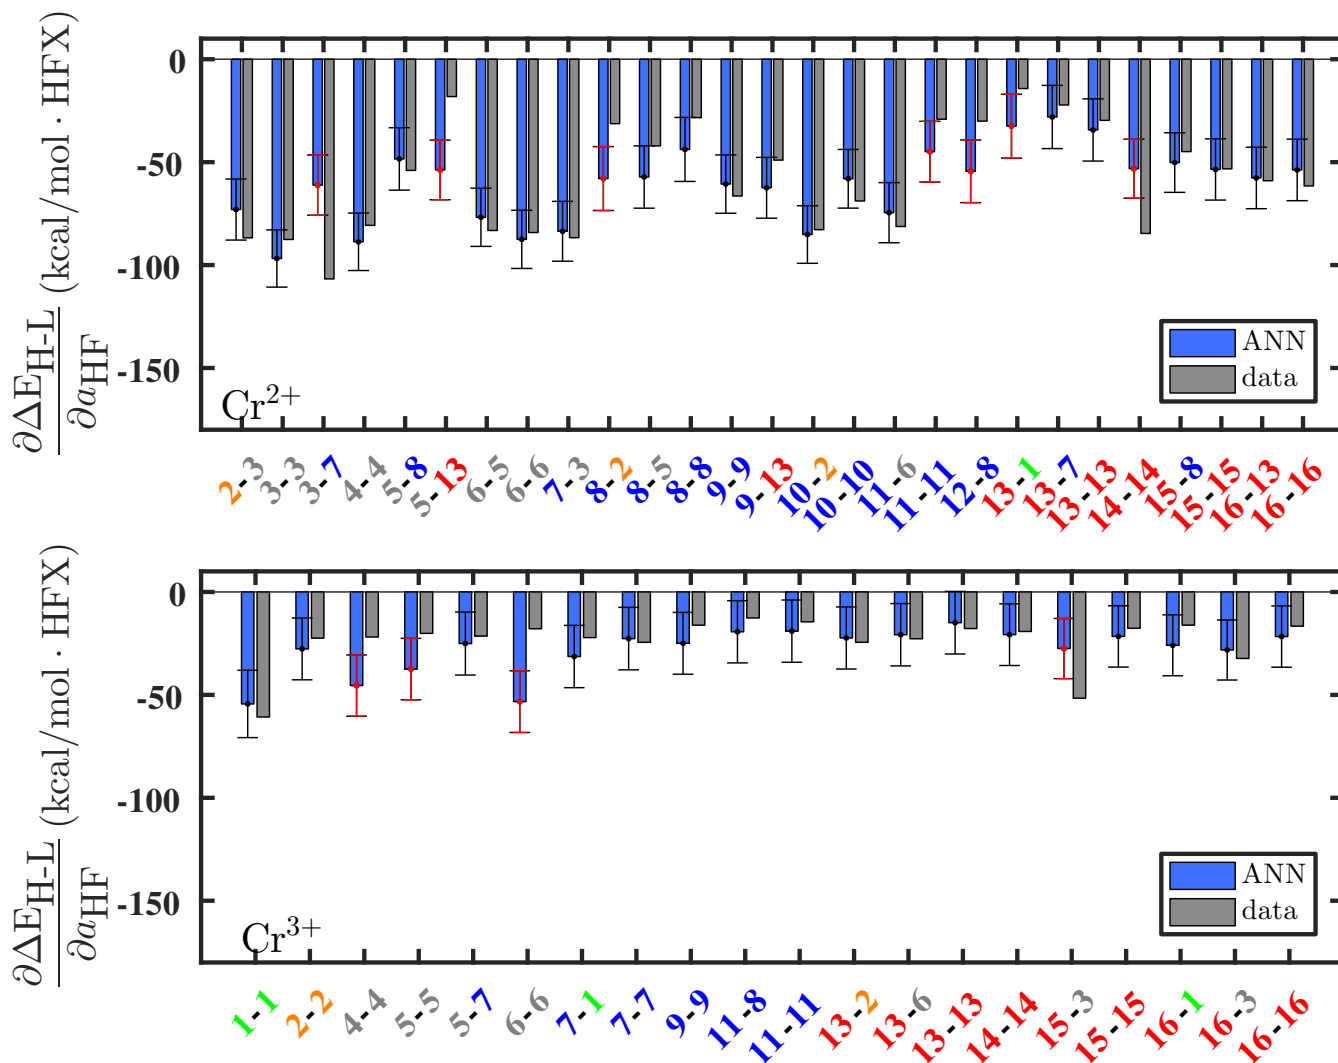

Figure S12: Model predictions of  $\frac{\partial \Delta E_{\text{H-L}}}{\partial a_{\text{HF}}}$  and data for Cr using an ANN. The ligands are described by two numbers indicating the equatorial first and then the axial, color coded by ligand identity (green for halogen, gray for carbon, blue for nitrogen, and red for oxygen). The error bars represent an estimated 1 standard deviation from the mean prediction.

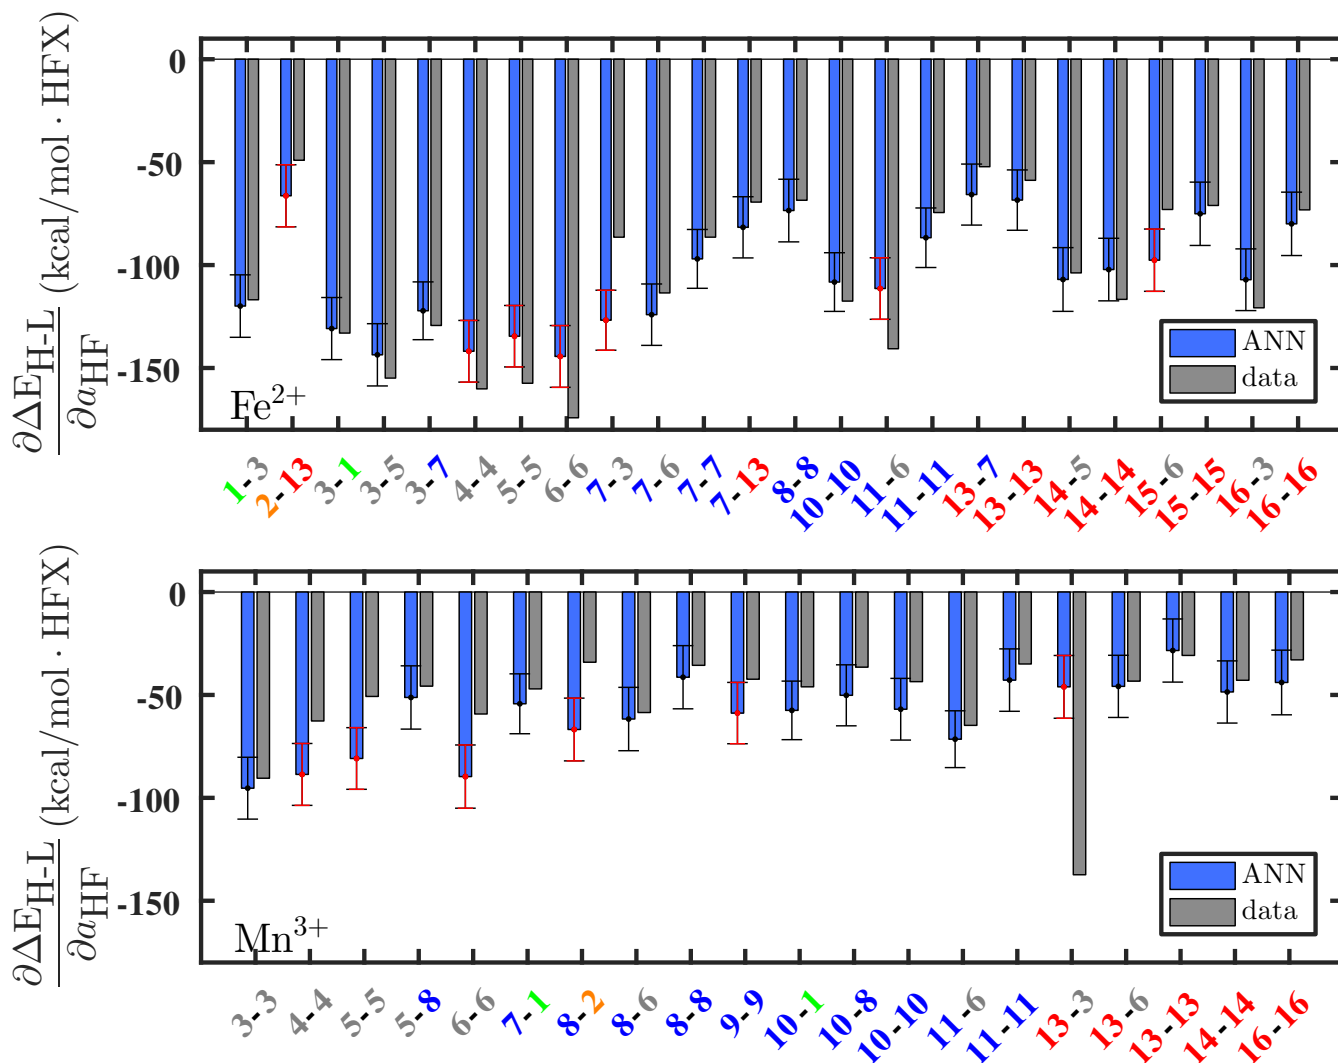

Figure S13: Model predictions of  $\frac{\partial \Delta E_{\text{H-L}}}{\partial a_{\text{HF}}}$  and data for low-spin Fe(II) (top) and Ni(II) (bottom) using an ANN. The ligands are described by two numbers indicating the equatorial first and then the axial, color coded by ligand identity (green for halogen, gray for carbon, blue for nitrogen, and red for oxygen). The error bars represent an estimated 1 standard deviation from the mean prediction.

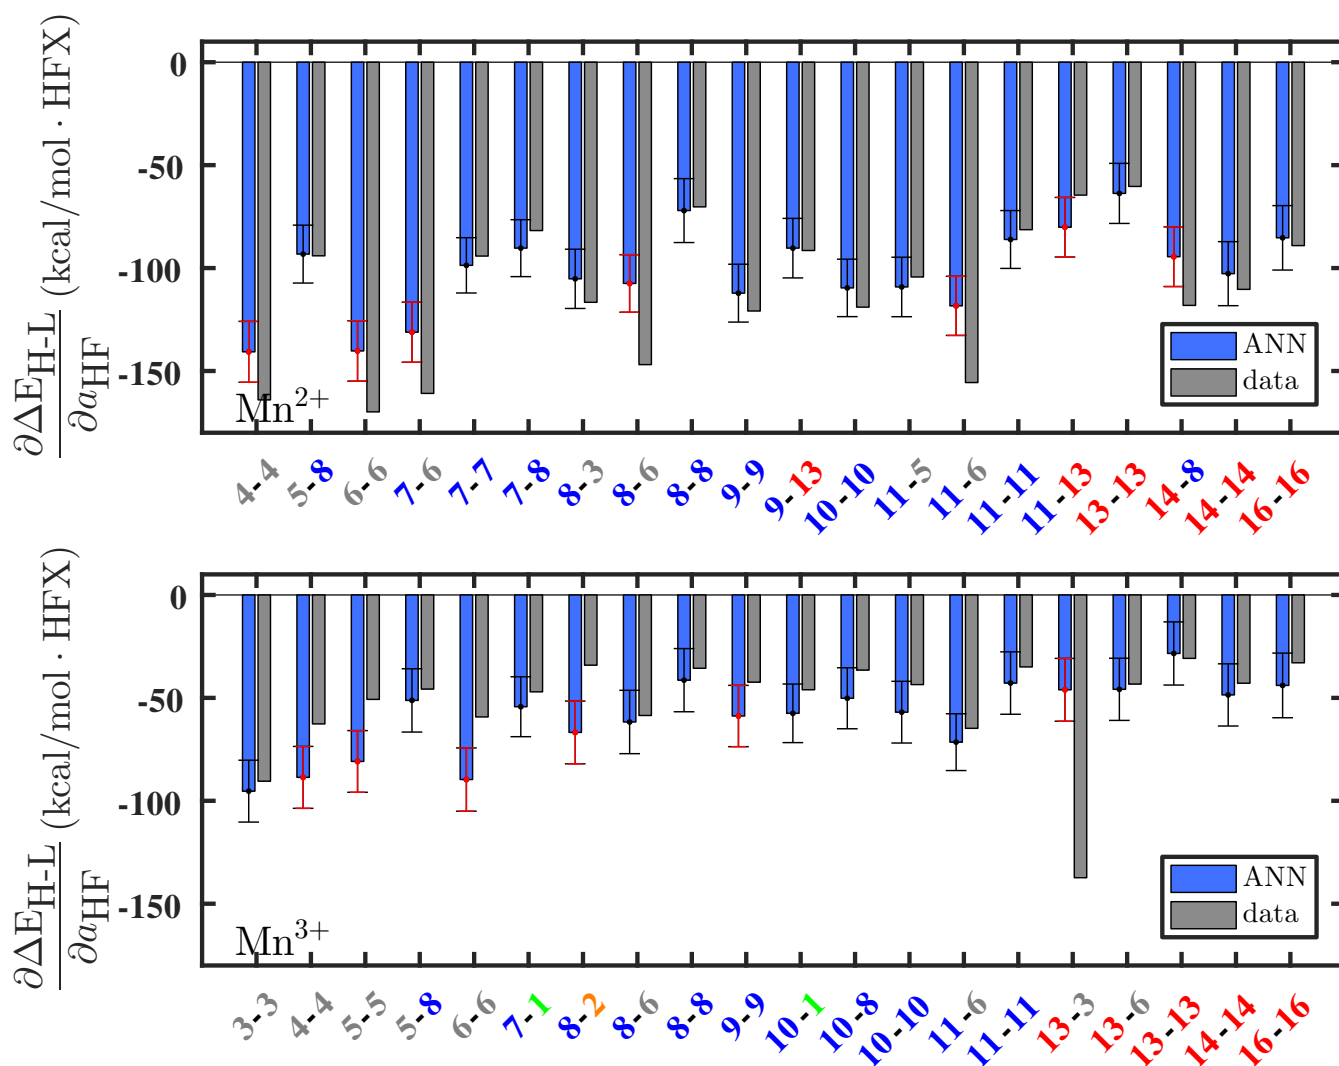

Figure S14: Model predictions of  $\frac{\partial \Delta E_{H-L}}{\partial a_{HF}}$  and data for Mn using an ANN. The ligands are described by two numbers indicating the equatorial first and then the axial, color coded by ligand identity (green for halogen, gray for carbon, blue for nitrogen, and red for oxygen). The error bars represent an estimated 1 standard deviation from the mean prediction.



Table S26: HFX sensitivity predictions and data compared in kcal/mol·HFX, compared for the full set of complexes. Each complex is named [metal oxidation axial ligand eq equatorial ligand]. For each complex, the first row has the data obtained from DFT and the second row has the ANN predictions

| name                     | type | HFX sensitivity |
|--------------------------|------|-----------------|
| cr 2 eq h2o ax ncs       | data | -22.2           |
|                          | pred | -28.1           |
| cr 2 eq porphyrin ax nh3 | data | -30.1           |
|                          | pred | -54.4           |
| cr 2 eq scn ax pisc      | data | -86.8           |
|                          | pred | -73             |
| cr 2 eq ncs ax pisc      | data | -86.7           |
|                          | pred | -83.6           |
| cr 2 eq cn ax nh3        | data | -54             |
|                          | pred | -48.4           |
| cr 2 eq tbuc ax tbuc     | data | -53.3           |
|                          | pred | -53.5           |
| cr 2 eq phen ax scn      | data | -82.8           |
|                          | pred | -85.2           |
| cr 2 eq en ax co         | data | -81.3           |
|                          | pred | -74.5           |
| cr 2 eq bipy ax bipy     | data | -66.5           |
|                          | pred | -60.7           |
| cr 2 eq en ax en         | data | -29.2           |
|                          | pred | -44.9           |
| cr 2 eq co ax cn         | data | -83.2           |
|                          | pred | -76.8           |
| cr 2 eq pisc ax pisc     | data | -87.6           |
|                          | pred | -96.8           |
| cr 2 eq ox ax h2o        | data | -59             |
|                          | pred | -57.7           |
| cr 2 eq h2o ax cl        | data | -14.3           |
|                          | pred | -32.5           |
| cr 2 eq nh3 ax scn       | data | -31.3           |
|                          | pred | -58             |
| cr 2 eq ox ax ox         | data | -61.6           |
|                          | pred | -53.8           |
| cr 2 eq h2o ax h2o       | data | -29.7           |
|                          | pred | -34.4           |
| cr 2 eq cn ax h2o        | data | -18.1           |
|                          | pred | -53.8           |
| cr 2 eq pisc ax ncs      | data | -107            |
|                          | pred | -61.2           |
| cr 2 eq acac ax acac     | data | -84.7           |
|                          | pred | -53.2           |
| cr 2 eq bipy ax h2o      | data | -49             |
|                          | pred | -62.5           |
| cr 2 eq nh3 ax nh3       | data | -28.4           |
|                          | pred | -43.8           |
| cr 2 eq co ax co         | data | -84.2           |
|                          | pred | -87.5           |
| cr 2 eq c2h3ns ax c2h3ns | data | -80.7           |
|                          | pred | -88.7           |
| cr 2 eq phen ax phen     | data | -68.9           |
|                          | pred | -58.1           |
| cr 2 eq tbuc ax nh3      | data | -44.9           |
|                          | pred | -50.2           |
| cr 2 eq nh3 ax cn        | data | -42.1           |
|                          | pred | -57.2           |
| cr 3 eq c2h3ns ax c2h3ns | data | -21.9           |
|                          | pred | -45.5           |
| cr 3 eq acac ax acac     | data | -19.2           |
|                          | pred | -20.7           |
| cr 3 eq h2o ax scn       | data | -24.5           |
|                          | pred | -22.3           |
| cr 3 eq en ax nh3        | data | -12.6           |
|                          | pred | -19.3           |
| cr 3 eq scn ax scn       | data | -22.4           |
|                          | pred | -27.7           |
| cr 3 eq en ax en         | data | -14.5           |
|                          | pred | -19             |
| cr 3 eq cn ax cn         | data | -20.1           |
|                          | pred | -37.5           |
| cr 3 eq cn ax ncs        | data | -21.4           |
|                          | pred | -25.1           |
| cr 3 eq tbuc ax tbuc     | data | -17.6           |
|                          | pred | -21.6           |
| cr 3 eq ncs ax ncs       | data | -24.5           |
|                          | pred | -22.7           |
| cr 3 eq ox ax ox         | data | -16.6           |
|                          | pred | -21.7           |
| cr 3 eq cl ax cl         | data | -60.7           |
|                          | pred | -54.4           |
| cr 3 eq co ax co         | data | -17.9           |

|                          |      |       |
|--------------------------|------|-------|
|                          | pred | -53.3 |
| cr 3 eq h2o ax co        | data | -22.7 |
|                          | pred | -20.8 |
| cr 3 eq bipy ax bipy     | data | -16.1 |
|                          | pred | -24.9 |
| cr 3 eq ncs ax cl        | data | -22.2 |
|                          | pred | -31.4 |
| cr 3 eq tbuc ax pisc     | data | -51.6 |
|                          | pred | -27.5 |
| cr 3 eq ox ax cl         | data | -16.1 |
|                          | pred | -25.9 |
| cr 3 eq h2o ax h2o       | data | -17.8 |
|                          | pred | -14.9 |
| cr 3 eq ox ax pisc       | data | -32.3 |
|                          | pred | -28.2 |
| mn 2 eq acac ax nh3      | data | -118  |
|                          | pred | -94.5 |
| mn 2 eq nh3 ax nh3       | data | -70.3 |
|                          | pred | -72.1 |
| mn 2 eq co ax co         | data | -170  |
|                          | pred | -140  |
| mn 2 eq cn ax nh3        | data | -94.1 |
|                          | pred | -93.2 |
| mn 2 eq en ax en         | data | -81.4 |
|                          | pred | -86.1 |
| mn 2 eq acac ax acac     | data | -110  |
|                          | pred | -103  |
| mn 2 eq en ax cn         | data | -104  |
|                          | pred | -109  |
| mn 2 eq bipy ax h2o      | data | -91.5 |
|                          | pred | -90.3 |
| mn 2 eq h2o ax h2o       | data | -60.3 |
|                          | pred | -63.7 |
| mn 2 eq ncs ax nh3       | data | -81.8 |
|                          | pred | -90.3 |
| mn 2 eq bipy ax bipy     | data | -121  |
|                          | pred | -112  |
| mn 2 eq ox ax ox         | data | -89.1 |
|                          | pred | -85.3 |
| mn 2 eq c2h3ns ax c2h3ns | data | -164  |
|                          | pred | -141  |
| mn 2 eq ncs ax co        | data | -161  |
|                          | pred | -131  |
| mn 2 eq ncs ax ncs       | data | -94.2 |
|                          | pred | -98.7 |
| mn 2 eq phen ax phen     | data | -119  |
|                          | pred | -110  |
| mn 2 eq nh3 ax co        | data | -147  |
|                          | pred | -107  |
| mn 2 eq en ax h2o        | data | -64.6 |
|                          | pred | -80.2 |
| mn 2 eq en ax co         | data | -156  |
|                          | pred | -118  |
| mn 2 eq nh3 ax pisc      | data | -117  |
|                          | pred | -105  |
| mn 3 eq en ax co         | data | -64.8 |
|                          | pred | -71.5 |
| mn 3 eq phen ax cl       | data | -46.1 |
|                          | pred | -57.5 |
| mn 3 eq phen ax phen     | data | -43.5 |
|                          | pred | -56.9 |
| mn 3 eq cn ax nh3        | data | -45.7 |
|                          | pred | -51.2 |
| mn 3 eq pisc ax pisc     | data | -90.5 |
|                          | pred | -95.3 |
| mn 3 eq ncs ax cl        | data | -47.1 |
|                          | pred | -54.3 |
| mn 3 eq h2o ax co        | data | -43.3 |
|                          | pred | -45.8 |
| mn 3 eq ox ax ox         | data | -33   |
|                          | pred | -43.9 |
| mn 3 eq co ax co         | data | -59.3 |
|                          | pred | -89.7 |
| mn 3 eq acac ax acac     | data | -42.9 |
|                          | pred | -48.6 |
| mn 3 eq nh3 ax nh3       | data | -35.6 |
|                          | pred | -41.4 |
| mn 3 eq nh3 ax co        | data | -58.5 |
|                          | pred | -61.7 |
| mn 3 eq cn ax cn         | data | -50.7 |
|                          | pred | -80.9 |
| mn 3 eq nh3 ax scn       | data | -34.1 |
|                          | pred | -66.8 |
| mn 3 eq bipy ax bipy     | data | -42.4 |
|                          | pred | -58.8 |
| mn 3 eq h2o ax pisc      | data | -137  |
|                          | pred | -46.1 |
| mn 3 eq en ax en         | data | -35   |
|                          | pred | -42.8 |
| mn 3 eq phen ax nh3      | data | -36.5 |

|                          |      |       |
|--------------------------|------|-------|
|                          | pred | -50.2 |
| mn 3 eq h2o ax h2o       | data | -30.8 |
|                          | pred | -28.4 |
| mn 3 eq c2h3ns ax c2h3ns | data | -62.7 |
|                          | pred | -88.6 |
| fe 2 eq co ax co         | data | -174  |
|                          | pred | -144  |
| fe 2 eq acac ax acac     | data | -117  |
|                          | pred | -102  |
| fe 2 eq tbuc ax co       | data | -73   |
|                          | pred | -97.6 |
| fe 2 eq cn ax cn         | data | -157  |
|                          | pred | -135  |
| fe 2 eq tbuc ax tbuc     | data | -71   |
|                          | pred | -75.1 |
| fe 2 eq h2o ax ncs       | data | -52.2 |
|                          | pred | -65.8 |
| fe 2 eq en ax en         | data | -74.5 |
|                          | pred | -86.7 |
| fe 2 eq cl ax pisc       | data | -117  |
|                          | pred | -120  |
| fe 2 eq ncs ax h2o       | data | -69.4 |
|                          | pred | -81.7 |
| fe 2 eq pisc ax cl       | data | -133  |
|                          | pred | -131  |
| fe 2 eq phen ax phen     | data | -118  |
|                          | pred | -108  |
| fe 2 eq scn ax h2o       | data | -49.1 |
|                          | pred | -66.4 |
| fe 2 eq nh3 ax nh3       | data | -68.5 |
|                          | pred | -73.5 |
| fe 2 eq c2h3ns ax c2h3ns | data | -160  |
|                          | pred | -142  |
| fe 2 eq ox ax pisc       | data | -121  |
|                          | pred | -107  |
| fe 2 eq pisc ax cn       | data | -155  |
|                          | pred | -144  |
| fe 2 eq acac ax cn       | data | -104  |
|                          | pred | -107  |
| fe 2 eq ox ax ox         | data | -73.2 |
|                          | pred | -80   |
| fe 2 eq h2o ax h2o       | data | -58.8 |
|                          | pred | -68.4 |
| fe 2 eq ncs ax pisc      | data | -86.5 |
|                          | pred | -127  |
| fe 2 eq en ax co         | data | -141  |
|                          | pred | -111  |
| fe 2 eq pisc ax ncs      | data | -129  |
|                          | pred | -122  |
| fe 2 eq ncs ax co        | data | -114  |
|                          | pred | -124  |
| fe 2 eq ncs ax ncs       | data | -86.4 |
|                          | pred | -97   |
| fe 3 eq tbuc ax tbuc     | data | -61   |
|                          | pred | -61.7 |
| fe 3 eq cn ax cn         | data | -112  |
|                          | pred | -107  |
| fe 3 eq acac ax acac     | data | -70.3 |
|                          | pred | -72.4 |
| fe 3 eq porphyrin ax h2o | data | -65.3 |
|                          | pred | -70.1 |
| fe 3 eq h2o ax cn        | data | -50.6 |
|                          | pred | -56.7 |
| fe 3 eq porphyrin ax cn  | data | -90.3 |
|                          | pred | -94.1 |
| fe 3 eq co ax co         | data | -113  |
|                          | pred | -113  |
| fe 3 eq ox ax ox         | data | -65.7 |
|                          | pred | -63.8 |
| fe 3 eq pisc ax h2o      | data | -102  |
|                          | pred | -86   |
| fe 3 eq acac ax cl       | data | -57   |
|                          | pred | -62.9 |
| fe 3 eq ox ax ncs        | data | -72.3 |
|                          | pred | -64.6 |
| fe 3 eq en ax en         | data | -67.1 |
|                          | pred | -62.2 |
| fe 3 eq pisc ax pisc     | data | -133  |
|                          | pred | -122  |
| fe 3 eq bipy ax co       | data | -147  |
|                          | pred | -122  |
| fe 3 eq pisc ax ncs      | data | -94.5 |
|                          | pred | -88.3 |
| fe 3 eq ncs ax cl        | data | -81.9 |
|                          | pred | -79   |
| fe 3 eq phen ax phen     | data | -87.8 |
|                          | pred | -82.6 |
| fe 3 eq h2o ax h2o       | data | -53.2 |
|                          | pred | -42.6 |
| fe 3 eq cl ax cl         | data | -69.6 |

|                          |      |       |
|--------------------------|------|-------|
|                          | pred | -69.1 |
| fe 3 eq pisc ax cl       | data | -73.9 |
|                          | pred | -94.9 |
| fe 3 eq c2h3ns ax c2h3ns | data | -112  |
|                          | pred | -117  |
| fe 3 eq nh3 ax scn       | data | -64.4 |
|                          | pred | -80.2 |
| fe 3 eq acac ax ncs      | data | -58.9 |
|                          | pred | -61.1 |
| fe 3 eq co ax scn        | data | -90.1 |
|                          | pred | -102  |
| fe 3 eq bipy ax bipy     | data | -75.2 |
|                          | pred | -85.7 |
| fe 3 eq ncs ax cn        | data | -75.3 |
|                          | pred | -108  |
| fe 3 eq ncs ax ncs       | data | -62.5 |
|                          | pred | -75.4 |
| fe 3 eq nh3 ax nh3       | data | -75.9 |
|                          | pred | -57.8 |
| fe 3 eq cl ax pisc       | data | -77.8 |
|                          | pred | -84.6 |
| co 2 eq ox ax ox         | data | -41.8 |
|                          | pred | -52.4 |
| co 2 eq en ax en         | data | -53   |
|                          | pred | -56.2 |
| co 2 eq tbuc ax tbuc     | data | -36   |
|                          | pred | -47.9 |
| co 2 eq cl ax pisc       | data | -71.9 |
|                          | pred | -76.1 |
| co 2 eq cn ax h2o        | data | -52.9 |
|                          | pred | -57   |
| co 2 eq en ax pisc       | data | -78.6 |
|                          | pred | -82.4 |
| co 2 eq phen ax h2o      | data | -59.4 |
|                          | pred | -63.5 |
| co 2 eq phen ax phen     | data | -65.8 |
|                          | pred | -74.3 |
| co 2 eq h2o ax ncs       | data | -34.6 |
|                          | pred | -40.7 |
| co 2 eq c2h3ns ax c2h3ns | data | -102  |
|                          | pred | -102  |
| co 2 eq nh3 ax nh3       | data | -50.4 |
|                          | pred | -53.5 |
| co 2 eq acac ax cn       | data | -63.1 |
|                          | pred | -85.3 |
| co 2 eq nh3 ax h2o       | data | -54.8 |
|                          | pred | -42.4 |
| co 2 eq acac ax acac     | data | -39.6 |
|                          | pred | -66.9 |
| co 2 eq ncs ax ncs       | data | -41.9 |
|                          | pred | -66.7 |
| co 2 eq bipy ax bipy     | data | -65.8 |
|                          | pred | -76.1 |
| co 2 eq co ax co         | data | -109  |
|                          | pred | -103  |
| co 2 eq en ax h2o        | data | -56.3 |
|                          | pred | -50.9 |
| co 2 eq h2o ax h2o       | data | -35.7 |
|                          | pred | -35.7 |
| co 3 eq co ax nh3        | data | -98.4 |
|                          | pred | -79.1 |
| co 3 eq acac ax nh3      | data | -42.8 |
|                          | pred | -52.4 |
| co 3 eq tbuc ax pisc     | data | -80.1 |
|                          | pred | -74.4 |
| co 3 eq nh3 ax nh3       | data | -60.4 |
|                          | pred | -57.6 |
| co 3 eq ox ax ox         | data | -68.6 |
|                          | pred | -53.1 |
| co 3 eq en ax en         | data | -51.3 |
|                          | pred | -58.1 |
| co 3 eq acac ax acac     | data | -47.5 |
|                          | pred | -55.8 |
| co 3 eq phen ax phen     | data | -76   |
|                          | pred | -72.5 |
| co 3 eq cn ax cn         | data | -95.3 |
|                          | pred | -89   |
| co 3 eq c2h3ns ax c2h3ns | data | -87.7 |
|                          | pred | -92.7 |
| co 3 eq co ax co         | data | -100  |
|                          | pred | -94.2 |
| co 3 eq tbuc ax tbuc     | data | -31.7 |
|                          | pred | -48.7 |
| co 3 eq h2o ax h2o       | data | -25.3 |
|                          | pred | -36.8 |
| co 3 eq ncs ax ncs       | data | -23.2 |
|                          | pred | -67.6 |
| co 3 eq pisc ax pisc     | data | -76.4 |
|                          | pred | -94.8 |
| co 3 eq bipy ax bipy     | data | -74   |

|                          |      |       |
|--------------------------|------|-------|
|                          | pred | -73.2 |
| co 3 eq acac ax ncs      | data | -61.9 |
|                          | pred | -54.8 |
| co 3 eq ox ax ncs        | data | -66   |
|                          | pred | -50.5 |
| co 3 eq acac ax co       | data | -86   |
|                          | pred | -75.8 |
| ni 2 eq tbuc ax tbuc     | data | -60.6 |
|                          | pred | -59.8 |
| ni 2 eq bipy ax nh3      | data | -57.9 |
|                          | pred | -59.3 |
| ni 2 eq en ax en         | data | -56.1 |
|                          | pred | -54.8 |
| ni 2 eq co ax co         | data | -67.2 |
|                          | pred | -79.3 |
| ni 2 eq nh3 ax nh3       | data | -73.1 |
|                          | pred | -55.2 |
| ni 2 eq acac ax cn       | data | -60   |
|                          | pred | -60.4 |
| ni 2 eq pisc ax pisc     | data | -80.4 |
|                          | pred | -86.1 |
| ni 2 eq en ax h2o        | data | -61.4 |
|                          | pred | -57.2 |
| ni 2 eq bipy ax bipy     | data | -62.7 |
|                          | pred | -60.7 |
| ni 2 eq ncs ax ncs       | data | -53.2 |
|                          | pred | -59.5 |
| ni 2 eq cn ax cn         | data | -65.6 |
|                          | pred | -69.8 |
| ni 2 eq acac ax co       | data | -52.4 |
|                          | pred | -63.1 |
| ni 2 eq c2h3ns ax c2h3ns | data | -62.1 |
|                          | pred | -76.6 |
| ni 2 eq acac ax nh3      | data | -50.4 |
|                          | pred | -51.1 |
| ni 2 eq acac ax acac     | data | -52.4 |
|                          | pred | -55   |
| ni 2 eq ox ax ox         | data | -69.2 |
|                          | pred | -59.5 |

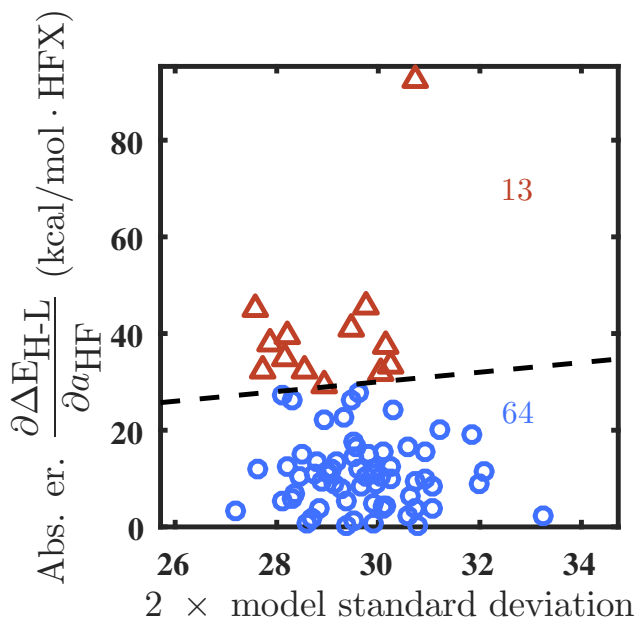

Figure S15: Parity plot for 2 standard deviation from the mean prediction and absolute prediction error for test case  $\frac{\partial \Delta E_{H-L}}{\partial a_{HF}}$  prediction using ANN. All units are kcal/mol.HFX. The black line is y=x.

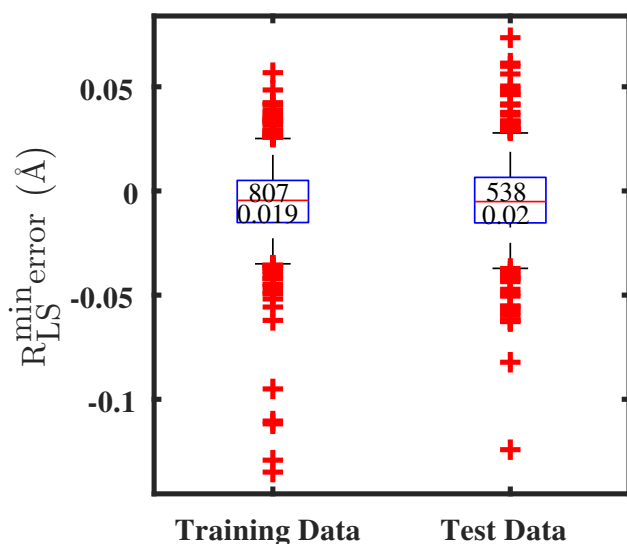

Figure S16: Error boxplot for regression of  $R_{LS}^{\min}$  using an ANN, showing training and test data comparison. The top number indicates the number of trials, while the bottom indicates the RMSE.

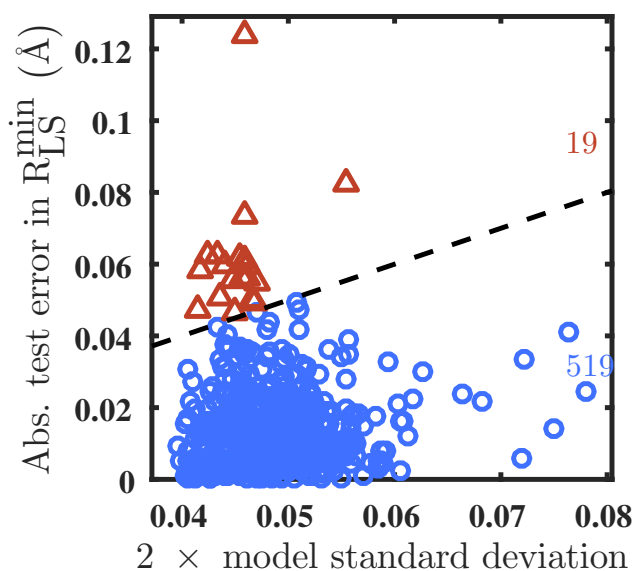

Figure S17: Parity plot for 2 standard deviation from the mean prediction and absolute prediction error for test case  $R_{LS}^{\min}$  prediction using ANN. All units are Å. The black line is  $y=x$ .

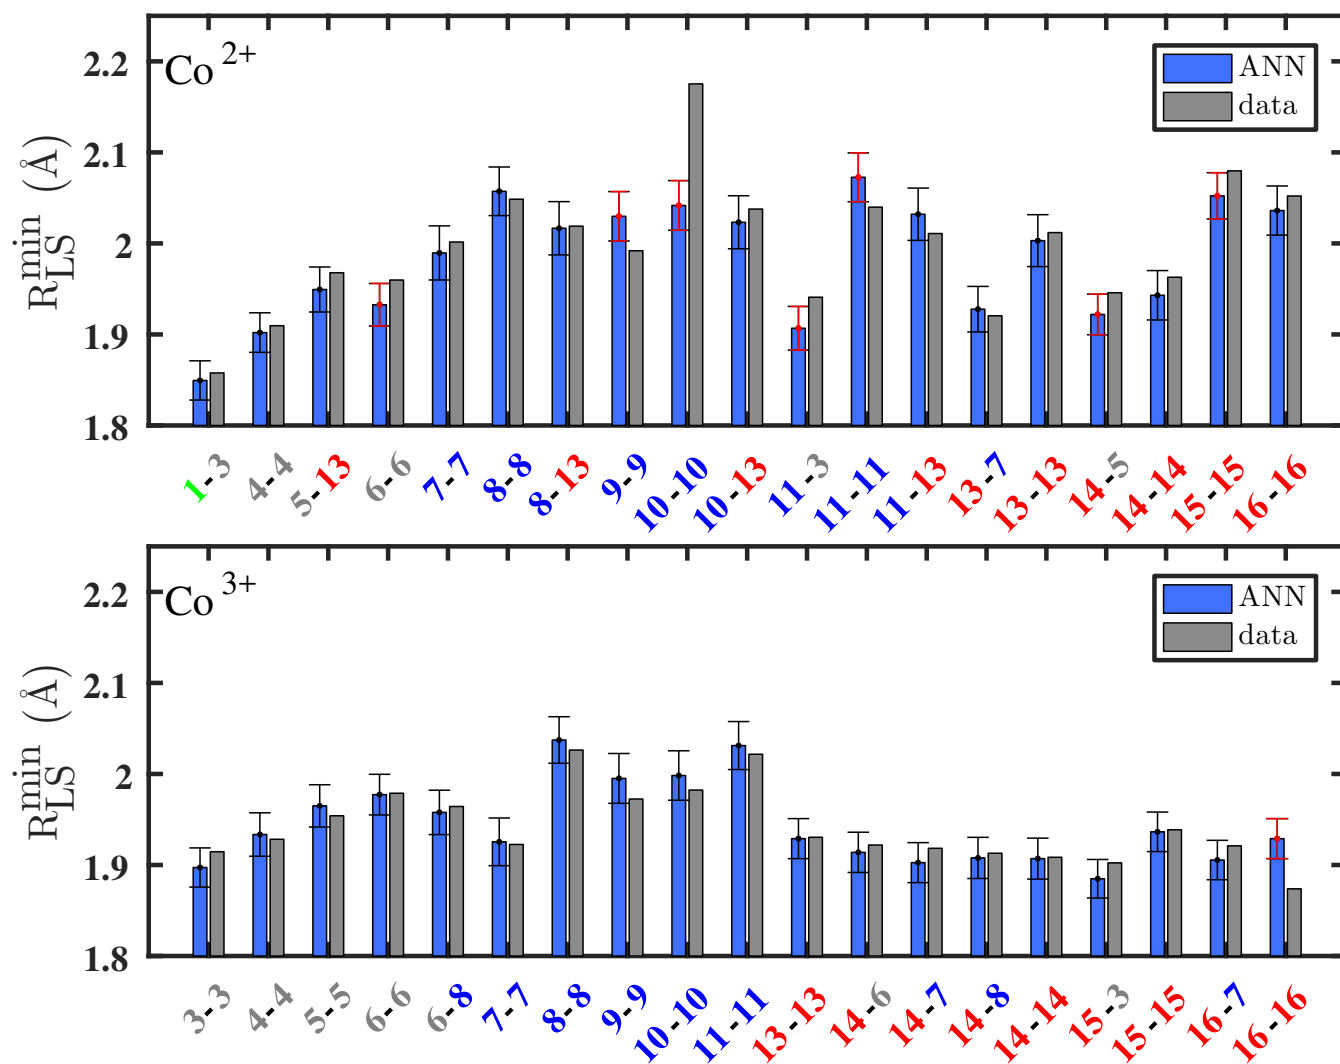

Figure S18: Model predictions of  $R_{LS}^{\min}$  and data for low-spin Co using an ANN. The ligands are described by two numbers indicating the equatorial first and then the axial, color coded by ligand identity (green for halogen, gray for carbon, blue for nitrogen, and red for oxygen). The error bars represent an estimated 1 standard deviation from the mean prediction.

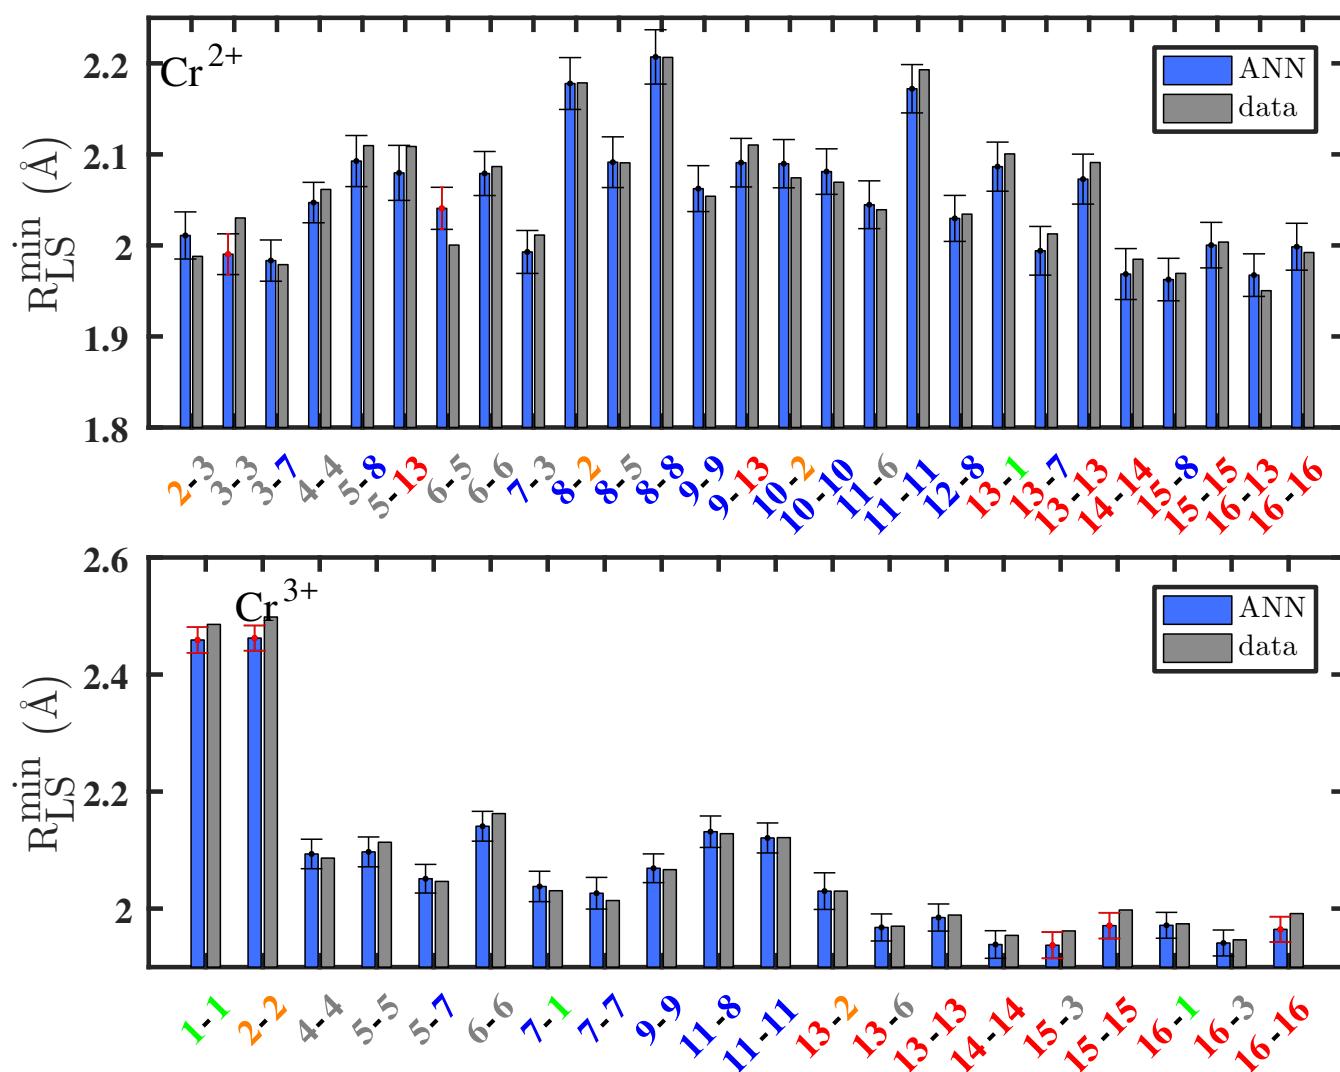

Figure S19: Model predictions of  $R_{LS}^{\min}$  and data for low-spin Cr using an ANN. The ligands are described by two numbers indicating the equatorial first and then the axial, color coded by ligand identity (green for halogen, gray for carbon, blue for nitrogen, and red for oxygen). The error bars represent an estimated 1 standard deviation from the mean prediction.



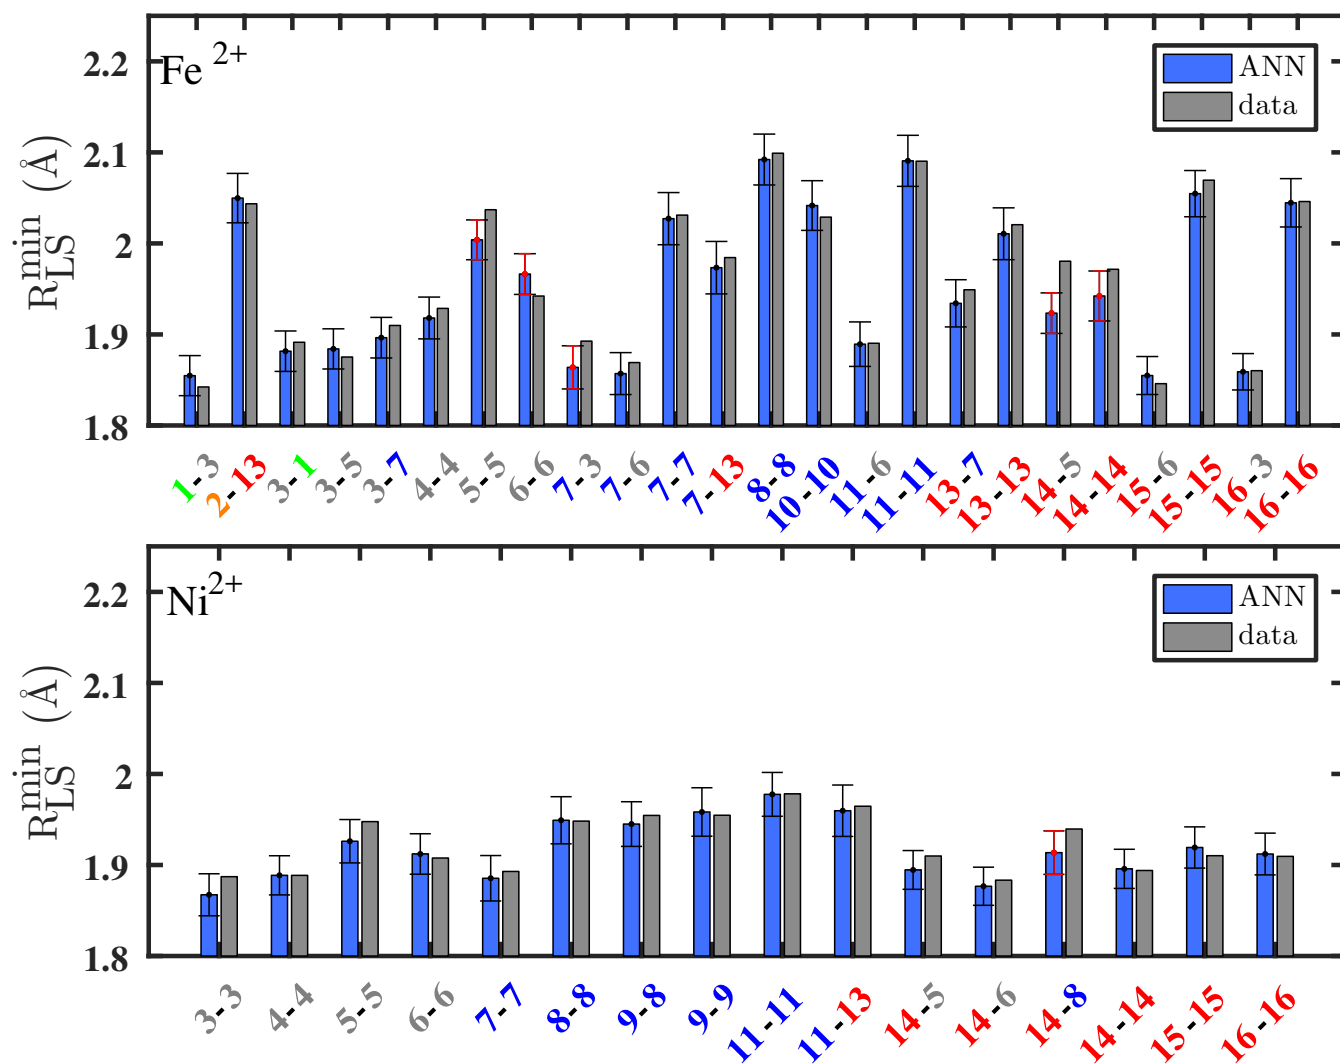

Figure S20: Model predictions of  $R_{LS}^{\min}$  and data for low-spin Fe(II) (top) and Ni(II) (bottom) using an ANN. The ligands are described by two numbers indicating the equatorial first and then the axial, color coded by ligand identity (green for halogen, gray for carbon, blue for nitrogen, and red for oxygen). The error bars represent an estimated 1 standard deviation from the mean prediction.

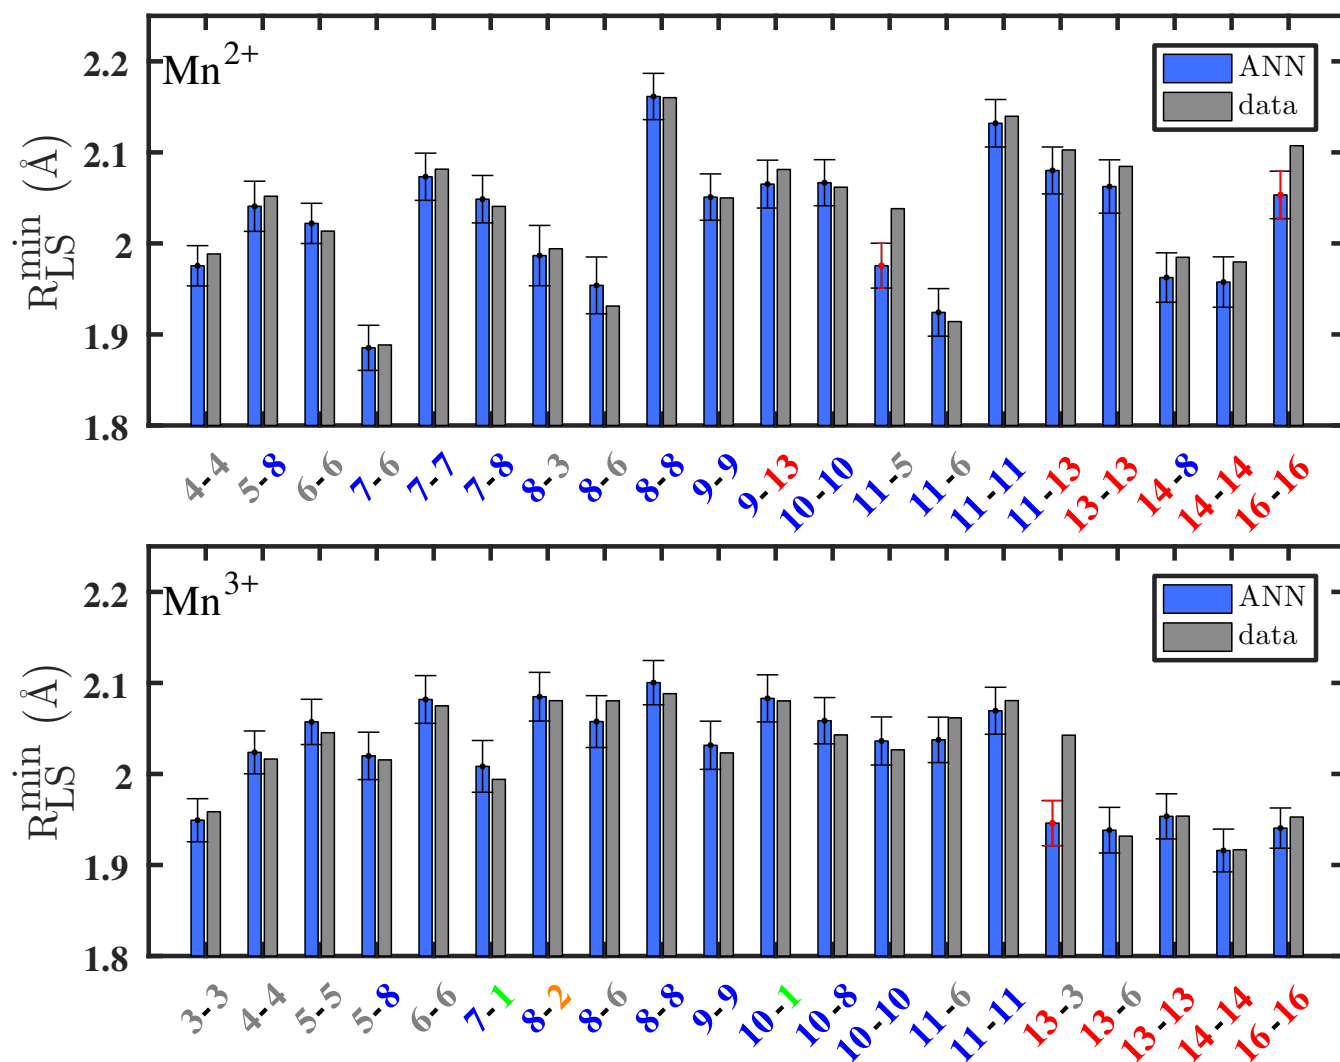

Figure S21: Model predictions of  $R_{LS}^{\min}$  and data for low-spin Mn using an ANN. The ligands are described by two numbers indicating the equatorial first and then the axial, color coded by ligand identity (green for halogen, gray for carbon, blue for nitrogen, and red for oxygen). The error bars represent an estimated 1 standard deviation from the mean prediction.

Table S27: LS bond distance predictions and data in Å, compared for the full set of complexes. Each complex is named [metal oxidation axial ligand eq equatorial ligand]. For each complex, the first row has the data obtained from DFT using varying fractions of exact exchange ( $a_{\text{HF}}$ ) and the second row has the ANN predictions

|                          | type | 0    | 0.05 | 0.1  | $a_{\text{HF}}$ | 0.15 | 0.2  | 0.25 | 0.30 |
|--------------------------|------|------|------|------|-----------------|------|------|------|------|
| cr 2 eq h2o ax ncs       | data | 1.98 | 1.99 | 2    | 2.01            | 2.01 | 2.02 | 2.03 |      |
|                          | pred | 1.97 | 1.98 | 1.98 | 1.99            | 1.99 | 2    | 2.01 |      |
| cr 2 eq porphyrin ax nh3 | data | 2.04 | 2.04 | 2.04 | 2.04            | 2.03 | 2.03 | 2.03 |      |
|                          | pred | 2.02 | 2.02 | 2.03 | 2.03            | 2.03 | 2.03 | 2.04 |      |
| cr 2 eq scn ax pisc      | data | 1.96 | 1.97 | 1.97 | 1.98            | 1.99 | 2    | 2    |      |
|                          | pred | 1.97 | 1.98 | 1.99 | 2               | 2.01 | 2.03 | 2.04 |      |
| cr 2 eq ncs ax pisc      | data | 1.99 | 2    | 2    | 2               | 2.01 | 2.02 | 2.03 |      |
|                          | pred | 1.96 | 1.97 | 1.98 | 1.99            | 1.99 | 2    | 2    |      |
| cr 2 eq cn ax nh3        | data | 2.09 | 2.08 | 2.09 | 2.1             | 2.11 | 2.12 | 2.13 |      |
|                          | pred | 2.06 | 2.07 | 2.08 | 2.08            | 2.09 | 2.1  | 2.11 |      |
| cr 2 eq tbuc ax tbuc     | data | 2.02 | 2.01 | 2.01 | 2.01            | 2    | 2    | 2    |      |
|                          | pred | 1.99 | 1.99 | 2    | 2               | 2    | 2    | 2.01 |      |
| cr 2 eq phen ax scn      | data | 2.07 | 2.07 | 2.08 | 2.07            | 2.07 | 2.08 | 2.09 |      |
|                          | pred | 2.07 | 2.08 | 2.08 | 2.09            | 2.09 | 2.09 | 2.1  |      |
| cr 2 eq en ax co         | data | 2    | 2    | 2.01 | 2.03            | 2.04 | 2.05 | 2.07 |      |
|                          | pred | 1.98 | 2    | 2.02 | 2.03            | 2.04 | 2.06 | 2.07 |      |
| cr 2 eq bipy ax bipy     | data | 2.04 | 2.04 | 2.04 | 2.04            | 2.05 | 2.07 | 2.08 |      |
|                          | pred | 2.05 | 2.05 | 2.05 | 2.06            | 2.06 | 2.07 | 2.07 |      |
| cr 2 eq en ax en         | data | 2.18 | 2.19 | 2.19 | 2.19            | 2.19 | 2.19 | 2.2  |      |
|                          | pred | 2.17 | 2.17 | 2.17 | 2.17            | 2.17 | 2.17 | 2.18 |      |
| cr 2 eq co ax cn         | data | 1.97 | 1.98 | 1.99 | 1.99            | 2    | 2.01 | 2.02 |      |
|                          | pred | 2.02 | 2.03 | 2.03 | 2.04            | 2.04 | 2.04 | 2.05 |      |
| cr 2 eq pisc ax pisc     | data | 1.99 | 2    | 2.01 | 2.02            | 2.03 | 2.04 | 2.05 |      |
|                          | pred | 1.96 | 1.97 | 1.98 | 1.98            | 1.99 | 2    | 2    |      |
| cr 2 eq ox ax h2o        | data | 1.97 | 1.96 | 1.96 | 1.95            | 1.95 | -    | -    |      |
|                          | pred | 1.96 | 1.96 | 1.96 | 1.96            | 1.97 | -    | -    |      |
| cr 2 eq h2o ax cl        | data | 2.11 | 2.1  | 2.1  | 2.1             | 2.1  | 2.1  | 2.1  |      |
|                          | pred | 2.09 | 2.09 | 2.09 | 2.09            | 2.09 | 2.09 | 2.09 |      |
| cr 2 eq nh3 ax scn       | data | 2.17 | 2.18 | 2.18 | 2.18            | 2.18 | 2.18 | 2.18 |      |
|                          | pred | 2.17 | 2.17 | 2.17 | 2.18            | 2.18 | 2.18 | 2.18 |      |
| cr 2 eq ox ax ox         | data | 2.01 | 2    | 2    | 2               | 1.99 | 1.99 | 1.98 |      |
|                          | pred | 1.99 | 1.99 | 1.99 | 2               | 2    | 2    | 2    |      |
| cr 2 eq h2o ax h2o       | data | 2.1  | 2.09 | 2.09 | 2.09            | 2.09 | 2.09 | 2.09 |      |
|                          | pred | 2.06 | 2.07 | 2.07 | 2.07            | 2.07 | 2.07 | 2.08 |      |
| cr 2 eq cn ax h2o        | data | 2.08 | 2.09 | 2.1  | 2.1             | 2.11 | 2.11 | 2.12 |      |
|                          | pred | 2.06 | 2.06 | 2.07 | 2.07            | 2.08 | 2.09 | 2.09 |      |
| cr 2 eq pisc ax ncs      | data | -    | 1.96 | 1.97 | 1.97            | 1.98 | 1.98 | 1.99 |      |
|                          | pred | -    | 1.97 | 1.97 | 1.98            | 1.98 | 1.99 | 2    |      |
| cr 2 eq acac ax acac     | data | 1.95 | 1.95 | 1.95 | 1.96            | 1.98 | 2    | 2.01 |      |
|                          | pred | 1.95 | 1.95 | 1.96 | 1.96            | 1.97 | 1.98 | 1.98 |      |
| cr 2 eq bipy ax h2o      | data | 2.08 | 2.09 | 2.09 | 2.09            | 2.11 | 2.12 | 2.12 |      |
|                          | pred | 2.06 | 2.07 | 2.08 | 2.08            | 2.09 | 2.1  | 2.1  |      |
| cr 2 eq nh3 ax nh3       | data | 2.2  | 2.2  | 2.2  | 2.21            | 2.21 | 2.21 | 2.22 |      |
|                          | pred | 2.2  | 2.2  | 2.2  | 2.21            | 2.21 | 2.21 | 2.21 |      |
| cr 2 eq co ax co         | data | 2.05 | 2.06 | 2.07 | 2.08            | 2.09 | 2.1  | 2.11 |      |
|                          | pred | 2.06 | 2.06 | 2.07 | 2.07            | 2.08 | 2.08 | 2.09 |      |
| cr 2 eq c2h3ns ax c2h3ns | data | 2.04 | 2.05 | 2.05 | 2.06            | 2.06 | 2.07 | 2.08 |      |
|                          | pred | 2.02 | 2.03 | 2.04 | 2.04            | 2.05 | 2.05 | 2.06 |      |
| cr 2 eq phen ax phen     | data | 2.05 | 2.05 | 2.06 | 2.06            | 2.07 | 2.09 | 2.09 |      |
|                          | pred | 2.07 | 2.07 | 2.07 | 2.08            | 2.08 | 2.09 | 2.09 |      |
| cr 2 eq tbuc ax nh3      | data | 1.98 | 1.98 | 1.98 | 1.97            | 1.97 | 1.97 | 1.96 |      |
|                          | pred | 1.95 | 1.96 | 1.96 | 1.96            | 1.96 | 1.97 | 1.97 |      |
| cr 2 eq nh3 ax cn        | data | 2.05 | 2.06 | 2.07 | 2.08            | 2.09 | 2.1  | 2.1  |      |
|                          | pred | 2.04 | 2.05 | 2.07 | 2.08            | 2.09 | 2.1  | 2.11 |      |
| cr 3 eq c2h3ns ax c2h3ns | data | 2.07 | 2.07 | 2.08 | 2.08            | 2.09 | 2.09 | 2.09 |      |
|                          | pred | 2.07 | 2.07 | 2.08 | 2.09            | 2.09 | 2.1  | 2.11 |      |
| cr 3 eq acac ax acac     | data | 1.96 | 1.96 | 1.96 | 1.96            | 1.95 | 1.95 | 1.96 |      |
|                          | pred | 1.92 | 1.93 | 1.93 | 1.93            | 1.94 | 1.94 | 1.95 |      |
| cr 3 eq h2o ax scn       | data | 2.05 | 2.04 | 2.04 | 2.03            | 2.03 | 2.03 | 2.02 |      |
|                          | pred | 2.03 | 2.03 | 2.03 | 2.03            | 2.03 | 2.03 | 2.04 |      |
| cr 3 eq en ax nh3        | data | 2.15 | 2.14 | 2.14 | 2.13            | 2.13 | 2.12 | 2.12 |      |
|                          | pred | 2.13 | 2.13 | 2.13 | 2.13            | 2.13 | 2.13 | 2.14 |      |
| cr 3 eq scn ax scn       | data | 2.51 | 2.5  | 2.5  | 2.5             | 2.5  | 2.49 | 2.49 |      |
|                          | pred | 2.46 | 2.46 | 2.46 | 2.46            | 2.46 | 2.46 | 2.46 |      |
| cr 3 eq en ax en         | data | 2.14 | 2.13 | 2.13 | 2.13            | 2.12 | 2.12 | 2.12 |      |
|                          | pred | 2.12 | 2.12 | 2.12 | 2.12            | 2.12 | 2.12 | 2.12 |      |
| cr 3 eq cn ax cn         | data | 2.1  | 2.11 | 2.11 | 2.11            | 2.11 | 2.11 | 2.12 |      |
|                          | pred | 2.08 | 2.08 | 2.09 | 2.09            | 2.1  | 2.1  | 2.1  |      |
| cr 3 eq cn ax ncs        | data | 2.03 | 2.03 | 2.04 | 2.04            | 2.05 | -    | -    |      |
|                          | pred | 2.04 | 2.04 | 2.04 | 2.05            | 2.05 | -    | -    |      |
| cr 3 eq tbuc ax tbuc     | data | -    | -    | 2.01 | 2               | 2    | 2    | 2    |      |
|                          | pred | -    | -    | 1.97 | 1.97            | 1.97 | 1.97 | 1.97 |      |
| cr 3 eq ncs ax ncs       | data | 2.01 | 2.01 | 2.01 | 2.01            | 2.01 | 2.02 | 2.02 |      |
|                          | pred | 2.01 | 2.02 | 2.02 | 2.02            | 2.03 | 2.03 | 2.03 |      |
| cr 3 eq ox ax ox         | data | 2    | 2    | 2    | 1.99            | 1.99 | 1.99 | 1.98 |      |
|                          | pred | 1.96 | 1.96 | 1.96 | 1.96            | 1.96 | 1.97 | 1.97 |      |
| cr 3 eq cl ax cl         | data | 2.5  | 2.49 | 2.48 | 2.49            | 2.49 | 2.48 | 2.48 |      |
|                          | pred | 2.46 | 2.46 | 2.46 | 2.46            | 2.46 | 2.46 | 2.46 |      |

|                          |      |      |      |      |      |      |      |      |
|--------------------------|------|------|------|------|------|------|------|------|
| cr 3 eq co ax co         | data | 2.15 | 2.15 | 2.16 | 2.16 | 2.16 | 2.16 | 2.17 |
|                          | pred | 2.13 | 2.13 | 2.13 | 2.14 | 2.14 | 2.14 | 2.15 |
| cr 3 eq h2o ax co        | data | 1.98 | 1.98 | 1.98 | 1.97 | 1.97 | 1.97 | 1.97 |
|                          | pred | 1.96 | 1.96 | 1.97 | 1.97 | 1.97 | 1.97 | 1.97 |
| cr 3 eq bipy ax bipy     | data | 2.07 | 2.07 | 2.07 | 2.07 | 2.07 | 2.07 | 2.07 |
|                          | pred | 2.06 | 2.06 | 2.07 | 2.07 | 2.07 | 2.07 | 2.07 |
| cr 3 eq ncs ax cl        | data | 2.02 | 2.02 | 2.03 | 2.03 | 2.03 | 2.03 | 2.03 |
|                          | pred | 2.02 | 2.02 | 2.03 | 2.03 | 2.04 | 2.04 | 2.05 |
| cr 3 eq tbuc ax pisc     | data | 1.96 | 1.96 | 1.96 | 1.97 | 1.96 | 1.96 | 1.95 |
|                          | pred | 1.93 | 1.93 | 1.93 | 1.94 | 1.94 | 1.94 | 1.94 |
| cr 3 eq ox ax cl         | data | 1.99 | 1.99 | 1.98 | 1.98 | 1.97 | 1.97 | 1.97 |
|                          | pred | 1.97 | 1.97 | 1.97 | 1.97 | 1.97 | 1.97 | 1.98 |
| cr 3 eq h2o ax h2o       | data | 2    | 2    | 1.99 | 1.99 | 1.99 | 1.99 | 1.98 |
|                          | pred | 1.98 | 1.98 | 1.98 | 1.98 | 1.98 | 1.99 | 1.99 |
| cr 3 eq ox ax pisc       | data | 1.95 | 1.95 | 1.95 | 1.95 | 1.95 | 1.94 | 1.94 |
|                          | pred | 1.93 | 1.94 | 1.94 | 1.94 | 1.94 | 1.94 | 1.94 |
| mn 2 eq acac ax nh3      | data | 1.93 | 1.94 | 1.95 | 1.96 | 1.98 | 2.01 | 2.02 |
|                          | pred | 1.95 | 1.95 | 1.95 | 1.96 | 1.96 | 1.97 | 1.98 |
| mn 2 eq nh3 ax nh3       | data | 2.15 | 2.15 | 2.16 | 2.16 | 2.16 | 2.16 | 2.16 |
|                          | pred | 2.13 | 2.14 | 2.15 | 2.16 | 2.16 | 2.17 | 2.17 |
| mn 2 eq co ax co         | data | 1.98 | 1.98 | 1.99 | 2    | 2.01 | 2.03 | 2.04 |
|                          | pred | 1.99 | 2    | 2.01 | 2.01 | 2.02 | 2.03 | 2.04 |
| mn 2 eq cn ax nh3        | data | 2.01 | 2.02 | 2.03 | 2.04 | 2.05 | 2.06 | 2.08 |
|                          | pred | 1.98 | 2    | 2.01 | 2.03 | 2.04 | 2.05 | 2.07 |
| mn 2 eq en ax en         | data | 2.13 | 2.13 | 2.14 | 2.14 | 2.14 | 2.15 | 2.14 |
|                          | pred | 2.11 | 2.12 | 2.12 | 2.13 | 2.13 | 2.14 | 2.14 |
| mn 2 eq acac ax acac     | data | 1.93 | 1.95 | 1.96 | 1.97 | 1.98 | 1.99 | 1.99 |
|                          | pred | 1.93 | 1.94 | 1.94 | 1.95 | 1.96 | 1.97 | 1.98 |
| mn 2 eq en ax cn         | data | 2    | 2.01 | 2.02 | 2.03 | 2.04 | 2.04 | 2.04 |
|                          | pred | 1.94 | 1.95 | 1.95 | 1.96 | 1.98 | 1.99 | 2    |
| mn 2 eq bipy ax h2o      | data | 2.04 | 2.05 | 2.07 | 2.07 | 2.08 | 2.09 | 2.09 |
|                          | pred | 2.03 | 2.04 | 2.05 | 2.06 | 2.07 | 2.07 | 2.08 |
| mn 2 eq h2o ax h2o       | data | 2.06 | 2.06 | 2.06 | 2.07 | 2.08 | 2.09 | 2.09 |
|                          | pred | 2.04 | 2.05 | 2.05 | 2.06 | 2.06 | 2.07 | 2.07 |
| mn 2 eq ncs ax nh3       | data | 1.99 | 2    | 2.02 | 2.03 | 2.04 | 2.05 | 2.06 |
|                          | pred | 1.99 | 2    | 2.02 | 2.03 | 2.05 | 2.06 | 2.08 |
| mn 2 eq bipy ax bipy     | data | 2.02 | 2.03 | 2.03 | 2.05 | 2.05 | 2.06 | 2.06 |
|                          | pred | 2.02 | 2.03 | 2.04 | 2.04 | 2.05 | 2.06 | 2.07 |
| mn 2 eq ox ax ox         | data | 2.03 | 2.05 | 2.08 | 2.09 | 2.11 | -    | -    |
|                          | pred | 2.03 | 2.04 | 2.05 | 2.05 | 2.05 | -    | -    |
| mn 2 eq c2h3ns ax c2h3ns | data | 1.96 | 1.97 | 1.97 | 1.98 | 1.99 | 2    | 2.01 |
|                          | pred | 1.95 | 1.96 | 1.96 | 1.97 | 1.98 | 1.98 | 1.99 |
| mn 2 eq ncs ax co        | data | 1.86 | 1.87 | 1.87 | 1.88 | 1.89 | 1.9  | 1.91 |
|                          | pred | 1.86 | 1.86 | 1.87 | 1.88 | 1.89 | 1.9  | 1.91 |
| mn 2 eq ncs ax ncs       | data | 2.03 | 2.04 | 2.05 | 2.07 | 2.08 | 2.1  | 2.14 |
|                          | pred | 2.03 | 2.04 | 2.05 | 2.06 | 2.07 | 2.08 | 2.09 |
| mn 2 eq phen ax phen     | data | 2.03 | 2.04 | 2.05 | 2.05 | 2.06 | 2.05 | 2.06 |
|                          | pred | 2.04 | 2.04 | 2.05 | 2.06 | 2.07 | 2.08 | 2.08 |
| mn 2 eq nh3 ax co        | data | 1.89 | 1.9  | 1.91 | 1.92 | 1.93 | 1.95 | 1.96 |
|                          | pred | 1.89 | 1.9  | 1.91 | 1.93 | 1.95 | 1.98 | 2    |
| mn 2 eq en ax h2o        | data | 2.09 | 2.09 | 2.09 | 2.1  | 2.1  | 2.1  | 2.1  |
|                          | pred | 2.05 | 2.06 | 2.07 | 2.08 | 2.08 | 2.08 | 2.09 |
| mn 2 eq en ax co         | data | 1.88 | 1.88 | 1.89 | 1.9  | 1.91 | 1.93 | 1.94 |
|                          | pred | 1.9  | 1.9  | 1.91 | 1.91 | 1.92 | 1.94 | 1.95 |
| mn 2 eq nh3 ax pisc      | data | 1.94 | 1.95 | 1.96 | 1.97 | 1.99 | 2.01 | 2.02 |
|                          | pred | 1.92 | 1.93 | 1.95 | 1.97 | 1.99 | 2    | 2.02 |
| mn 3 eq en ax co         | data | 2.01 | 2.02 | 2.04 | 2.05 | 2.06 | 2.07 | 2.06 |
|                          | pred | 2    | 2.01 | 2.02 | 2.03 | 2.04 | 2.04 | 2.05 |
| mn 3 eq phen ax cl       | data | 2.08 | 2.08 | 2.08 | 2.08 | 2.08 | 2.08 | 2.08 |
|                          | pred | 2.07 | 2.07 | 2.07 | 2.08 | 2.08 | 2.09 | 2.1  |
| mn 3 eq phen ax phen     | data | 2.03 | 2.03 | 2.03 | 2.03 | 2.03 | 2.02 | 2.02 |
|                          | pred | 2.03 | 2.03 | 2.03 | 2.04 | 2.04 | 2.04 | 2.04 |
| mn 3 eq cn ax nh3        | data | 2    | 2.01 | 2.01 | 2.01 | 2.02 | 2.02 | 2.02 |
|                          | pred | 2    | 2.01 | 2.01 | 2.02 | 2.02 | 2.02 | 2.03 |
| mn 3 eq pisc ax pisc     | data | 1.92 | 1.93 | 1.94 | 1.95 | 1.96 | 1.97 | 1.98 |
|                          | pred | 1.92 | 1.93 | 1.94 | 1.94 | 1.95 | 1.95 | 1.96 |
| mn 3 eq ncs ax cl        | data | 1.98 | 1.98 | 1.99 | 1.99 | 1.99 | 2    | 2    |
|                          | pred | 1.98 | 1.99 | 1.99 | 2    | 2.01 | 2.02 | 2.03 |
| mn 3 eq h2o ax co        | data | 1.95 | 1.95 | 1.94 | 1.94 | 1.93 | 1.93 | 1.93 |
|                          | pred | 1.93 | 1.94 | 1.94 | 1.94 | 1.94 | 1.94 | 1.94 |
| mn 3 eq ox ax ox         | data | 1.97 | 1.97 | 1.96 | 1.96 | 1.95 | 1.95 | 1.94 |
|                          | pred | 1.94 | 1.94 | 1.94 | 1.94 | 1.94 | 1.94 | 1.94 |
| mn 3 eq co ax co         | data | 2.05 | 2.06 | 2.06 | 2.07 | 2.07 | 2.08 | 2.08 |
|                          | pred | 2.06 | 2.06 | 2.07 | 2.08 | 2.08 | 2.09 | 2.09 |
| mn 3 eq acac ax acac     | data | 1.91 | 1.92 | 1.92 | 1.9  | 1.92 | 1.92 | 1.92 |
|                          | pred | 1.91 | 1.91 | 1.91 | 1.91 | 1.92 | 1.92 | 1.92 |
| mn 3 eq nh3 ax nh3       | data | 2.11 | 2.1  | 2.1  | 2.09 | 2.09 | 2.08 | 2.08 |
|                          | pred | 2.1  | 2.1  | 2.1  | 2.1  | 2.1  | 2.1  | 2.1  |
| mn 3 eq nh3 ax co        | data | 2.03 | 2.04 | 2.06 | 2.07 | 2.08 | 2.08 | 2.08 |
|                          | pred | 2.02 | 2.04 | 2.04 | 2.05 | 2.06 | 2.06 | 2.07 |
| mn 3 eq cn ax cn         | data | 2.03 | 2.03 | 2.04 | 2.04 | 2.05 | 2.05 | 2.05 |
|                          | pred | 2.03 | 2.04 | 2.05 | 2.05 | 2.06 | 2.06 | 2.07 |
| mn 3 eq nh3 ax scn       | data | 2.09 | 2.09 | 2.09 | 2.08 | 2.08 | 2.08 | 2.08 |
|                          | pred | 2.09 | 2.09 | 2.08 | 2.08 | 2.08 | 2.09 | 2.09 |
| mn 3 eq bipy ax bipy     | data | 2.02 | 2.02 | 2.02 | 2.02 | 2.02 | 2.02 | 2.02 |
|                          | pred | 2.03 | 2.03 | 2.03 | 2.03 | 2.03 | 2.03 | 2.03 |
| mn 3 eq h2o ax pisc      | data | 1.97 | 1.97 | 1.98 | 2.03 | 2.04 | 2.06 | -    |
|                          | pred | 1.93 | 1.94 | 1.94 | 1.94 | 1.95 | 1.95 | -    |
| mn 3 eq en ax en         | data | 2.08 | 2.08 | 2.08 | 2.08 | 2.08 | 2.08 | 2.07 |
|                          | pred | 2.07 | 2.07 | 2.07 | 2.07 | 2.07 | 2.07 | 2.07 |

|                          |      |      |      |      |      |      |      |      |
|--------------------------|------|------|------|------|------|------|------|------|
| mn 3 eq phen ax nh3      | data | 2.06 | 2.05 | 2.05 | 2.04 | 2.04 | 2.04 | 2.04 |
|                          | pred | 2.05 | 2.05 | 2.06 | 2.06 | 2.06 | 2.06 | 2.06 |
| mn 3 eq h2o ax h2o       | data | 1.97 | 1.96 | 1.96 | 1.96 | 1.95 | 1.95 | 1.95 |
|                          | pred | 1.95 | 1.95 | 1.95 | 1.95 | 1.95 | 1.96 | 1.96 |
| mn 3 eq c2h3ns ax c2h3ns | data | 1.99 | 2    | 2.01 | 2.01 | 2.02 | 2.02 | 2.02 |
|                          | pred | 2    | 2.01 | 2.01 | 2.02 | 2.02 | 2.03 | 2.04 |
| fe 2 eq co ax co         | data | 1.92 | 1.92 | 1.93 | 1.93 | 1.94 | 1.95 | 1.96 |
|                          | pred | 1.94 | 1.95 | 1.95 | 1.96 | 1.97 | 1.97 | 1.98 |
| fe 2 eq acac ax acac     | data | 1.94 | 1.94 | 1.95 | 1.95 | 1.97 | 1.97 | 1.98 |
|                          | pred | 1.92 | 1.93 | 1.93 | 1.94 | 1.94 | 1.95 | 1.96 |
| fe 2 eq tbuc ax co       | data | 1.82 | 1.82 | 1.83 | 1.84 | 1.85 | 1.86 | 1.87 |
|                          | pred | 1.85 | 1.85 | 1.85 | 1.85 | 1.85 | 1.86 | 1.86 |
| fe 2 eq cn ax cn         | data | 2    | 2    | 2.01 | 2.02 | 2.04 | 2.05 | 2.07 |
|                          | pred | 1.96 | 1.97 | 1.98 | 1.99 | 2    | 2.01 | 2.02 |
| fe 2 eq tbuc ax tbuc     | data | 2.04 | 2.05 | 2.06 | 2.06 | 2.07 | 2.07 | -    |
|                          | pred | 2.04 | 2.04 | 2.05 | 2.05 | 2.05 | 2.06 | -    |
| fe 2 eq h2o ax ncs       | data | 1.93 | 1.93 | 1.94 | 1.94 | 1.95 | 1.95 | 1.96 |
|                          | pred | 1.91 | 1.92 | 1.92 | 1.93 | 1.93 | 1.94 | 1.95 |
| fe 2 eq en ax en         | data | 2.08 | 2.08 | 2.09 | 2.09 | 2.09 | 2.09 | 2.09 |
|                          | pred | 2.06 | 2.07 | 2.08 | 2.09 | 2.09 | 2.1  | 2.1  |
| fe 2 eq cl ax pisc       | data | 1.81 | 1.82 | 1.82 | 1.83 | 1.84 | 1.86 | 1.87 |
|                          | pred | 1.85 | 1.85 | 1.85 | 1.85 | 1.85 | 1.86 | 1.86 |
| fe 2 eq ncs ax h2o       | data | 1.93 | 1.94 | 1.95 | 1.98 | 1.98 | 1.99 | 2    |
|                          | pred | 1.95 | 1.95 | 1.96 | 1.96 | 1.97 | 1.98 | 1.99 |
| fe 2 eq pisc ax cl       | data | 1.87 | 1.87 | 1.88 | 1.88 | 1.89 | 1.9  | 1.91 |
|                          | pred | 1.86 | 1.86 | 1.87 | 1.87 | 1.88 | 1.89 | 1.9  |
| fe 2 eq phen ax phen     | data | 2.01 | 2.01 | 2.02 | 2.02 | 2.03 | 2.03 | 2.04 |
|                          | pred | 2.01 | 2.02 | 2.03 | 2.03 | 2.04 | 2.05 | 2.06 |
| fe 2 eq scn ax h2o       | data | 2.05 | 2.05 | 2.04 | 2.04 | 2.04 | 2.04 | 2.04 |
|                          | pred | 2.04 | 2.04 | 2.05 | 2.05 | 2.05 | 2.05 | 2.05 |
| fe 2 eq nh3 ax nh3       | data | 2.09 | 2.09 | 2.09 | 2.1  | 2.1  | 2.1  | 2.1  |
|                          | pred | 2.05 | 2.06 | 2.08 | 2.08 | 2.09 | 2.1  | 2.1  |
| fe 2 eq c2h3ns ax c2h3ns | data | 1.91 | 1.91 | 1.92 | 1.92 | 1.93 | 1.94 | 1.94 |
|                          | pred | 1.9  | 1.91 | 1.91 | 1.91 | 1.92 | 1.92 | 1.93 |
| fe 2 eq ox ax pisc       | data | 1.83 | 1.83 | 1.84 | 1.85 | 1.86 | 1.87 | 1.89 |
|                          | pred | 1.85 | 1.85 | 1.85 | 1.86 | 1.86 | 1.86 | 1.87 |
| fe 2 eq pisc ax cn       | data | 1.86 | 1.86 | 1.87 | 1.87 | 1.88 | 1.88 | 1.89 |
|                          | pred | 1.87 | 1.87 | 1.88 | 1.88 | 1.88 | 1.89 | 1.89 |
| fe 2 eq acac ax cn       | data | 1.94 | 1.94 | 1.96 | 1.96 | 1.98 | 1.99 | 1.99 |
|                          | pred | 1.92 | 1.92 | 1.92 | 1.92 | 1.92 | 1.92 | 1.93 |
| fe 2 eq ox ax ox         | data | 2.03 | 2.04 | 2.04 | 2.04 | 2.05 | 2.05 | 2.05 |
|                          | pred | 2.01 | 2.02 | 2.03 | 2.04 | 2.04 | 2.05 | 2.05 |
| fe 2 eq h2o ax h2o       | data | 2.03 | 2.03 | 2.02 | 2.02 | 2.02 | 2.02 | 2.02 |
|                          | pred | 1.99 | 2    | 2    | 2.01 | 2.01 | 2.01 | 2.02 |
| fe 2 eq ncs ax pisc      | data | 1.85 | 1.86 | 1.87 | 1.88 | 1.89 | -    | 1.92 |
|                          | pred | 1.85 | 1.85 | 1.85 | 1.86 | 1.86 | -    | 1.88 |
| fe 2 eq en ax co         | data | 1.85 | 1.86 | 1.87 | 1.88 | 1.89 | 1.91 | 1.92 |
|                          | pred | 1.87 | 1.87 | 1.88 | 1.88 | 1.89 | 1.9  | 1.91 |
| fe 2 eq pisc ax ncs      | data | 1.88 | 1.89 | 1.89 | 1.9  | 1.91 | 1.92 | 1.93 |
|                          | pred | 1.87 | 1.88 | 1.88 | 1.89 | 1.9  | 1.9  | 1.91 |
| fe 2 eq ncs ax co        | data | 1.84 | 1.84 | 1.85 | 1.86 | 1.87 | 1.88 | 1.9  |
|                          | pred | 1.85 | 1.85 | 1.85 | 1.85 | 1.86 | 1.86 | 1.87 |
| fe 2 eq ncs ax ncs       | data | 1.99 | 2    | 2.01 | 2.03 | 2.03 | 2.04 | 2.05 |
|                          | pred | 1.98 | 2    | 2.01 | 2.02 | 2.03 | 2.04 | 2.04 |
| fe 3 eq tbuc ax tbuc     | data | 1.96 | 1.96 | 1.96 | 1.95 | 1.95 | 1.95 | 1.94 |
|                          | pred | 1.93 | 1.94 | 1.94 | 1.94 | 1.94 | 1.94 | 1.94 |
| fe 3 eq cn ax cn         | data | 1.98 | 1.99 | 1.99 | 1.99 | 2    | 2    | 2    |
|                          | pred | 1.98 | 1.99 | 1.99 | 2    | 2    | 2.01 | 2.01 |
| fe 3 eq acac ax acac     | data | 1.92 | 1.92 | 1.92 | 1.91 | 1.91 | 1.91 | 1.9  |
|                          | pred | 1.91 | 1.91 | 1.91 | 1.91 | 1.91 | 1.91 | 1.91 |
| fe 3 eq porphyrin ax h2o | data | 1.99 | 1.99 | 1.98 | 1.98 | 2.03 | 2.03 | 2.03 |
|                          | pred | 1.99 | 1.99 | 1.99 | 1.99 | 1.99 | 2    | 2    |
| fe 3 eq h2o ax cn        | data | 1.94 | 1.94 | 1.95 | 1.95 | 1.95 | 1.95 | 1.95 |
|                          | pred | 1.92 | 1.92 | 1.92 | 1.92 | 1.93 | 1.93 | 1.93 |
| fe 3 eq porphyrin ax cn  | data | 1.98 | 1.98 | 1.98 | 1.98 | 1.99 | 1.99 | 1.99 |
|                          | pred | 1.96 | 1.96 | 1.97 | 1.97 | 1.97 | 1.98 | 1.98 |
| fe 3 eq co ax co         | data | 2.01 | 2.01 | 2.02 | 2.02 | 2.03 | 2.03 | 2.03 |
|                          | pred | 2    | 2    | 2.01 | 2.01 | 2.02 | 2.03 | 2.03 |
| fe 3 eq ox ax ox         | data | 1.95 | 1.95 | 1.95 | 1.94 | 1.94 | 1.93 | 1.93 |
|                          | pred | 1.93 | 1.93 | 1.93 | 1.93 | 1.93 | 1.93 | 1.94 |
| fe 3 eq pisc ax h2o      | data | 1.92 | 1.92 | 1.93 | 1.94 | 1.95 | 1.96 | 1.97 |
|                          | pred | 1.91 | 1.91 | 1.91 | 1.91 | 1.91 | 1.91 | 1.91 |
| fe 3 eq acac ax cl       | data | 1.95 | 1.95 | 1.95 | 1.94 | 1.94 | 1.94 | 1.93 |
|                          | pred | 1.93 | 1.93 | 1.93 | 1.93 | 1.93 | 1.93 | 1.93 |
| fe 3 eq ox ax ncs        | data | 1.95 | 1.95 | 1.94 | 1.94 | 1.93 | 1.92 | 1.92 |
|                          | pred | 1.9  | 1.9  | 1.9  | 1.9  | 1.91 | 1.91 | 1.91 |
| fe 3 eq en ax en         | data | 2.07 | 2.07 | 2.06 | 2.05 | 2.05 | 2.05 | 2.05 |
|                          | pred | 2.05 | 2.05 | 2.05 | 2.05 | 2.05 | 2.05 | 2.05 |
| fe 3 eq pisc ax pisc     | data | 1.91 | 1.91 | 1.91 | 1.92 | 1.92 | 1.92 | 1.94 |
|                          | pred | 1.9  | 1.9  | 1.9  | 1.91 | 1.91 | 1.91 | 1.91 |
| fe 3 eq bipy ax co       | data | 1.89 | 1.9  | 1.9  | 1.9  | 1.92 | 1.93 | 1.95 |
|                          | pred | 1.89 | 1.9  | 1.91 | 1.92 | 1.92 | 1.93 | 1.94 |
| fe 3 eq pisc ax ncs      | data | 1.9  | 1.9  | 1.9  | 1.89 | 1.89 | 1.89 | 1.88 |
|                          | pred | 1.91 | 1.91 | 1.91 | 1.91 | 1.92 | 1.92 | 1.92 |
| fe 3 eq ncs ax cl        | data | 1.94 | 1.95 | 1.95 | 1.95 | 1.95 | 1.95 | 1.96 |
|                          | pred | 1.94 | 1.94 | 1.95 | 1.95 | 1.96 | 1.96 | 1.97 |
| fe 3 eq phen ax phen     | data | 2.01 | 2.01 | 2.01 | 2.01 | 2    | 2    | 2    |
|                          | pred | 2.01 | 2.01 | 2.01 | 2.01 | 2.01 | 2.01 | 2.01 |
| fe 3 eq h2o ax h2o       | data | 1.94 | 1.94 | 1.94 | 1.94 | 1.94 | 1.93 | 1.93 |
|                          | pred | 1.93 | 1.93 | 1.93 | 1.93 | 1.93 | 1.93 | 1.93 |

|                          |      |      |      |      |      |      |      |      |
|--------------------------|------|------|------|------|------|------|------|------|
| fe 3 eq cl ax cl         | data | 2.46 | 2.46 | 2.46 | 2.45 | 2.45 | 2.45 | 2.46 |
|                          | pred | 2.44 | 2.44 | 2.45 | 2.45 | 2.45 | 2.45 | 2.45 |
| fe 3 eq pisc ax cl       | data | 1.92 | 1.93 | 1.93 | 1.94 | 1.94 | 1.95 | 1.96 |
|                          | pred | 1.9  | 1.91 | 1.91 | 1.92 | 1.92 | 1.93 | 1.94 |
| fe 3 eq c2h3ns ax c2h3ns | data | 1.95 | 1.96 | 1.96 | 1.96 | 1.97 | 1.97 | 1.98 |
|                          | pred | 1.94 | 1.95 | 1.95 | 1.95 | 1.96 | 1.96 | 1.96 |
| fe 3 eq nh3 ax scn       | data | 2.06 | 2.06 | 2.05 | 2.05 | 2.05 | -    | -    |
|                          | pred | 2.05 | 2.05 | 2.05 | 2.05 | 2.05 |      |      |
| fe 3 eq acac ax ncs      | data | 1.88 | 1.88 | 1.88 | 1.88 | 1.88 | 1.88 | 1.89 |
|                          | pred | 1.9  | 1.9  | 1.9  | 1.9  | 1.9  | 1.9  | 1.9  |
| fe 3 eq co ax scn        | data | -    | -    | 1.88 | 1.89 | 1.9  | 1.9  | 1.91 |
|                          | pred |      |      | 1.93 | 1.93 | 1.93 | 1.94 | 1.94 |
| fe 3 eq bipy ax bipy     | data | 2    | 2    | 2    | 2    | 2    | 2    | 2    |
|                          | pred | 2    | 2    | 2    | 2    | 2    | 2    | 2    |
| fe 3 eq ncs ax cn        | data | 1.94 | 1.95 | 1.95 | 1.95 | 1.96 | 1.96 | 1.96 |
|                          | pred | 1.91 | 1.92 | 1.92 | 1.93 | 1.93 | 1.93 | 1.94 |
| fe 3 eq ncs ax ncs       | data | 1.94 | 1.94 | 1.94 | 1.94 | 1.94 | 1.94 | 1.94 |
|                          | pred | 1.94 | 1.94 | 1.94 | 1.94 | 1.95 | 1.95 | 1.95 |
| fe 3 eq nh3 ax nh3       | data | 2.08 | 2.07 | 2.07 | 2.06 | 2.06 | 2.06 | 2.05 |
|                          | pred | 2.06 | 2.06 | 2.06 | 2.06 | 2.06 | 2.06 | 2.06 |
| fe 3 eq cl ax pisc       | data | 1.86 | 1.87 | 1.88 | 1.89 | 1.9  | 1.92 | 1.93 |
|                          | pred | 1.87 | 1.88 | 1.89 | 1.9  | 1.9  | 1.91 | 1.91 |
| co 2 eq ox ax ox         | data | 2.02 | 2.04 | 2.04 | 2.05 | 2.05 | 2.06 | 2.05 |
|                          | pred | 2.01 | 2.01 | 2.02 | 2.03 | 2.04 | 2.04 | 2.05 |
| co 2 eq en ax en         | data | 2.04 | 2.04 | 2.04 | 2.04 | 2.04 | 2.05 | 2.06 |
|                          | pred | 2.04 | 2.05 | 2.06 | 2.07 | 2.07 | 2.08 | 2.08 |
| co 2 eq tbuc ax tbuc     | data | 2.06 | 2.07 | 2.07 | 2.08 | 2.08 | 2.08 | 2.05 |
|                          | pred | 2.03 | 2.04 | 2.04 | 2.05 | 2.05 | 2.05 | 2.06 |
| co 2 eq cl ax pisc       | data | 1.82 | 1.82 | 1.83 | 1.84 | 1.86 | 1.87 | 1.89 |
|                          | pred | 1.85 | 1.85 | 1.85 | 1.85 | 1.85 | 1.85 | 1.85 |
| co 2 eq cn ax h2o        | data | 1.94 | 1.95 | 1.95 | 1.96 | 1.97 | 1.98 | 1.98 |
|                          | pred | 1.93 | 1.93 | 1.94 | 1.94 | 1.95 | 1.95 | 1.96 |
| co 2 eq en ax pisc       | data | 1.89 | 1.9  | 1.91 | 1.93 | 1.94 | 1.96 | 1.97 |
|                          | pred | 1.89 | 1.89 | 1.9  | 1.9  | 1.91 | 1.91 | 1.92 |
| co 2 eq phen ax h2o      | data | 2.02 | 2.02 | 2.03 | 2.03 | 2.04 | 2.05 | 2.06 |
|                          | pred | 2    | 2.01 | 2.01 | 2.02 | 2.02 | 2.03 | 2.03 |
| co 2 eq phen ax phen     | data | 1.98 | 1.99 | 1.99 | 2.17 | 2.18 | 2.18 | 2.18 |
|                          | pred | 1.99 | 2    | 2.02 | 2.03 | 2.04 | 2.05 | 2.06 |
| co 2 eq h2o ax ncs       | data | 1.92 | 1.92 | 1.91 | 1.92 | 1.92 | 1.93 | 1.93 |
|                          | pred | 1.91 | 1.92 | 1.92 | 1.92 | 1.93 | 1.93 | 1.93 |
| co 2 eq c2h3ns ax c2h3ns | data | 1.91 | 1.89 | 1.89 | 1.9  | 1.91 | 1.92 | 1.92 |
|                          | pred | 1.89 | 1.89 | 1.9  | 1.9  | 1.9  | 1.91 | 1.91 |
| co 2 eq nh3 ax nh3       | data | 2.04 | 2.04 | 2.04 | 2.04 | 2.05 | 2.06 | 2.07 |
|                          | pred | 2.01 | 2.02 | 2.03 | 2.05 | 2.06 | 2.07 | 2.07 |
| co 2 eq acac ax cn       | data | 1.93 | 1.93 | 1.94 | 1.94 | 1.95 | 1.95 | 1.96 |
|                          | pred | 1.91 | 1.91 | 1.92 | 1.92 | 1.92 | 1.92 | 1.93 |
| co 2 eq nh3 ax h2o       | data | 2.02 | 2.02 | 2.02 | 2.02 | 2.02 | 2.02 | 2.02 |
|                          | pred | 2    | 2    | 2.01 | 2.01 | 2.02 | 2.02 | 2.03 |
| co 2 eq acac ax acac     | data | 1.92 | 1.93 | 1.94 | 1.96 | 1.96 | 1.97 | 1.97 |
|                          | pred | 1.93 | 1.93 | 1.93 | 1.94 | 1.94 | 1.95 | 1.95 |
| co 2 eq ncs ax ncs       | data | 1.93 | 1.96 | 1.97 | 1.99 | 2    | 2.01 | 2.02 |
|                          | pred | 1.92 | 1.94 | 1.96 | 1.97 | 1.99 | 2    | 2.02 |
| co 2 eq bipy ax bipy     | data | 1.97 | 1.97 | 1.98 | 1.99 | 1.99 | 2    | 1.99 |
|                          | pred | 1.99 | 2    | 2.01 | 2.02 | 2.03 | 2.04 | 2.05 |
| co 2 eq co ax co         | data | 1.92 | 1.93 | 1.94 | 1.95 | 1.96 | 1.97 | 1.95 |
|                          | pred | 1.91 | 1.92 | 1.92 | 1.93 | 1.93 | 1.94 | 1.95 |
| co 2 eq en ax h2o        | data | 2.01 | 2.02 | 2.01 | 2.01 | 2.01 | 2.01 | 2.01 |
|                          | pred | 2.01 | 2.02 | 2.02 | 2.03 | 2.03 | 2.04 | 2.04 |
| co 2 eq h2o ax h2o       | data | 2.01 | 2.01 | 2.01 | 2.01 | 2.01 | 2.01 | 2.01 |
|                          | pred | 1.99 | 1.99 | 2    | 2    | 2    | 2.01 | 2.01 |
| co 3 eq co ax nh3        | data | -    | 1.94 | 1.95 | 1.96 | 1.96 | 1.97 | 1.98 |
|                          | pred |      | 1.94 | 1.95 | 1.95 | 1.96 | 1.96 | 1.97 |
| co 3 eq acac ax nh3      | data | 1.93 | 1.93 | 1.92 | 1.92 | 1.91 | 1.91 | 1.9  |
|                          | pred | 1.91 | 1.91 | 1.91 | 1.91 | 1.91 | 1.91 | 1.91 |
| co 3 eq tbuc ax pisc     | data | 1.87 | 1.88 | 1.89 | 1.89 | 1.9  | 1.91 | 1.91 |
|                          | pred | 1.87 | 1.88 | 1.88 | 1.88 | 1.88 | 1.89 | 1.89 |
| co 3 eq nh3 ax nh3       | data | 2.05 | 2.04 | 2.04 | 2.03 | 2.03 | 2.02 | 2.02 |
|                          | pred | 2.03 | 2.03 | 2.03 | 2.03 | 2.04 | 2.04 | 2.04 |
| co 3 eq ox ax ox         | data | 1.87 | 1.88 | 1.88 | 1.87 | 1.87 | 1.87 | 1.86 |
|                          | pred | 1.92 | 1.92 | 1.92 | 1.93 | 1.93 | 1.93 | 1.93 |
| co 3 eq en ax en         | data | 2.04 | 2.03 | 2.03 | 2.02 | 2.02 | 2.02 | 2.01 |
|                          | pred | 2.03 | 2.03 | 2.03 | 2.03 | 2.03 | 2.03 | 2.03 |
| co 3 eq acac ax acac     | data | 1.93 | 1.93 | 1.92 | 1.92 | 1.91 | 1.9  | 1.9  |
|                          | pred | 1.91 | 1.91 | 1.91 | 1.91 | 1.91 | 1.91 | 1.91 |
| co 3 eq phen ax phen     | data | 1.99 | 1.99 | 1.99 | 1.98 | 1.98 | 1.98 | 1.98 |
|                          | pred | 1.99 | 1.99 | 2    | 2    | 2    | 2    | 2    |
| co 3 eq cn ax cn         | data | 1.95 | 1.95 | 1.95 | 1.95 | 1.95 | 1.96 | 1.96 |
|                          | pred | 1.94 | 1.95 | 1.95 | 1.96 | 1.96 | 1.97 | 1.98 |
| co 3 eq c2h3ns ax c2h3ns | data | 1.92 | 1.92 | 1.92 | 1.93 | 1.93 | 1.93 | 1.93 |
|                          | pred | 1.92 | 1.92 | 1.93 | 1.93 | 1.93 | 1.94 | 1.94 |
| co 3 eq co ax co         | data | 1.97 | 1.97 | 1.97 | 1.97 | 1.98 | 1.98 | 1.98 |
|                          | pred | 1.96 | 1.96 | 1.97 | 1.97 | 1.98 | 1.98 | 1.99 |
| co 3 eq tbuc ax tbuc     | data | 1.96 | 1.96 | 1.95 | 1.94 | 1.94 | 1.93 | 1.93 |
|                          | pred | 1.93 | 1.93 | 1.93 | 1.93 | 1.94 | 1.94 | 1.94 |
| co 3 eq h2o ax h2o       | data | 1.96 | 1.95 | 1.95 | 1.94 | 1.93 | 1.92 | 1.92 |
|                          | pred | 1.93 | 1.93 | 1.93 | 1.93 | 1.93 | 1.93 | 1.93 |
| co 3 eq ncs ax ncs       | data | 1.92 | 1.92 | 1.92 | 1.92 | 1.92 | 1.92 | 1.92 |
|                          | pred | 1.92 | 1.92 | 1.92 | 1.92 | 1.93 | 1.93 | 1.93 |
| co 3 eq pisc ax pisc     | data | 1.91 | 1.91 | 1.91 | 1.91 | 1.91 | 1.91 | 1.92 |
|                          | pred | 1.88 | 1.89 | 1.89 | 1.89 | 1.9  | 1.9  | 1.9  |

|                          |      |      |      |      |      |      |      |      |
|--------------------------|------|------|------|------|------|------|------|------|
| co 3 eq bipy ax bipy     | data | 1.98 | 1.98 | 1.98 | 1.98 | 1.97 | 1.97 | 1.97 |
|                          | pred | 1.99 | 1.99 | 1.99 | 1.99 | 2    | 2    | 2    |
| co 3 eq acac ax ncs      | data | 1.93 | 1.93 | 1.92 | 1.92 | 1.92 | 1.91 | 1.91 |
|                          | pred | 1.9  | 1.9  | 1.9  | 1.9  | 1.9  | 1.9  | 1.9  |
| co 3 eq ox ax ncs        | data | 1.94 | 1.94 | 1.94 | 1.93 | 1.92 | 1.91 | 1.91 |
|                          | pred | 1.9  | 1.9  | 1.9  | 1.9  | 1.91 | 1.91 | 1.91 |
| co 3 eq acac ax co       | data | 1.93 | 1.94 | 1.94 | 1.93 | 1.92 | 1.91 | 1.91 |
|                          | pred | 1.91 | 1.91 | 1.91 | 1.91 | 1.91 | 1.91 | 1.91 |
| ni 2 eq tbuc ax tbuc     | data | 1.93 | 1.93 | 1.92 | 1.92 | 1.91 | 1.91 | 1.91 |
|                          | pred | 1.91 | 1.91 | 1.91 | 1.92 | 1.92 | 1.92 | 1.93 |
| ni 2 eq bipy ax nh3      | data | 1.95 | 1.95 | 1.95 | 1.95 | 1.95 | 1.96 | 1.95 |
|                          | pred | 1.94 | 1.94 | 1.94 | 1.94 | 1.94 | 1.95 | 1.96 |
| ni 2 eq en ax en         | data | 1.98 | 1.98 | 1.98 | 1.98 | 1.98 | 1.98 | 1.98 |
|                          | pred | 1.96 | 1.97 | 1.97 | 1.97 | 1.98 | 1.98 | 1.99 |
| ni 2 eq co ax co         | data | 1.87 | 1.88 | 1.89 | 1.9  | 1.91 | 1.92 | 1.93 |
|                          | pred | 1.9  | 1.9  | 1.9  | 1.91 | 1.91 | 1.92 | 1.92 |
| ni 2 eq nh3 ax nh3       | data | 1.95 | 1.95 | 1.95 | 1.95 | 1.95 | 1.95 | 1.95 |
|                          | pred | 1.93 | 1.94 | 1.94 | 1.94 | 1.95 | 1.96 | 1.96 |
| ni 2 eq acac ax cn       | data | 1.9  | 1.9  | 1.9  | 1.91 | 1.91 | 1.91 | 1.92 |
|                          | pred | 1.89 | 1.89 | 1.89 | 1.89 | 1.89 | 1.9  | 1.9  |
| ni 2 eq pisc ax pisc     | data | 1.87 | 1.87 | 1.88 | 1.88 | 1.89 | 1.89 | 1.9  |
|                          | pred | 1.86 | 1.86 | 1.86 | 1.87 | 1.87 | 1.87 | 1.87 |
| ni 2 eq en ax h2o        | data | 1.97 | 1.97 | 1.97 | 1.97 | 1.96 | 1.96 | 1.96 |
|                          | pred | 1.96 | 1.96 | 1.96 | 1.96 | 1.96 | 1.96 | 1.96 |
| ni 2 eq bipy ax bipy     | data | 1.94 | 1.95 | 1.95 | 1.95 | 1.95 | 1.96 | 1.96 |
|                          | pred | 1.94 | 1.94 | 1.95 | 1.95 | 1.96 | 1.96 | 1.97 |
| ni 2 eq ncs ax ncs       | data | 1.88 | 1.88 | 1.88 | 1.89 | 1.89 | 1.9  | 1.9  |
|                          | pred | 1.87 | 1.87 | 1.87 | 1.88 | 1.89 | 1.89 | 1.9  |
| ni 2 eq cn ax cn         | data | -    | -    | 1.94 | 1.94 | 1.95 | 1.96 | 1.96 |
|                          | pred |      |      | 1.92 | 1.92 | 1.93 | 1.93 | 1.94 |
| ni 2 eq acac ax co       | data | 1.89 | 1.89 | 1.88 | 1.88 | 1.88 | 1.88 | 1.88 |
|                          | pred | 1.87 | 1.87 | 1.87 | 1.88 | 1.88 | 1.88 | 1.88 |
| ni 2 eq c2h3ns ax c2h3ns | data | 1.86 | 1.87 | 1.87 | 1.88 | 1.89 | 1.89 | 1.9  |
|                          | pred | 1.88 | 1.88 | 1.88 | 1.89 | 1.89 | 1.89 | 1.89 |
| ni 2 eq acac ax nh3      | data | 1.95 | 1.94 | 1.94 | 1.94 | 1.94 | 1.94 | 1.94 |
|                          | pred | 1.91 | 1.91 | 1.91 | 1.91 | 1.91 | 1.91 | 1.91 |
| ni 2 eq acac ax acac     | data | 1.89 | 1.89 | 1.89 | 1.89 | 1.89 | 1.89 | 1.9  |
|                          | pred | 1.9  | 1.9  | 1.9  | 1.9  | 1.9  | 1.9  | 1.9  |
| ni 2 eq ox ax ox         | data | 1.93 | 1.92 | 1.92 | 1.91 | 1.91 | 1.91 | 1.91 |
|                          | pred | 1.91 | 1.91 | 1.91 | 1.91 | 1.91 | 1.91 | 1.92 |

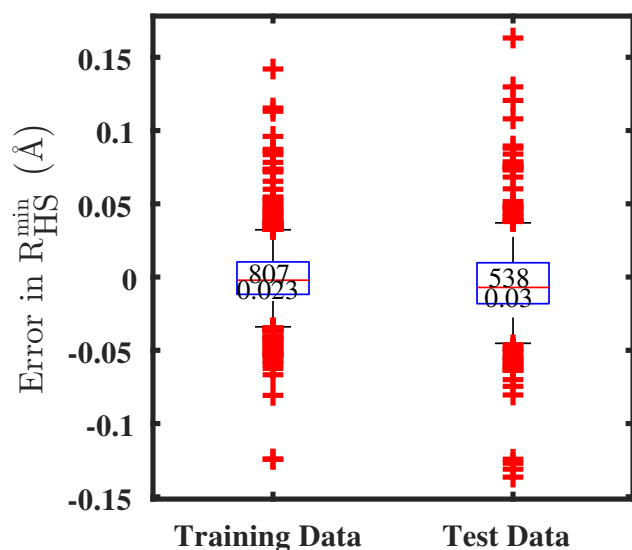

Figure S22: Error boxplot for regression of  $R_{HS}^{\min}$  using an ANN, showing training and test data comparison. The top number indicates the number of trials, while the bottom indicates the RMSE.

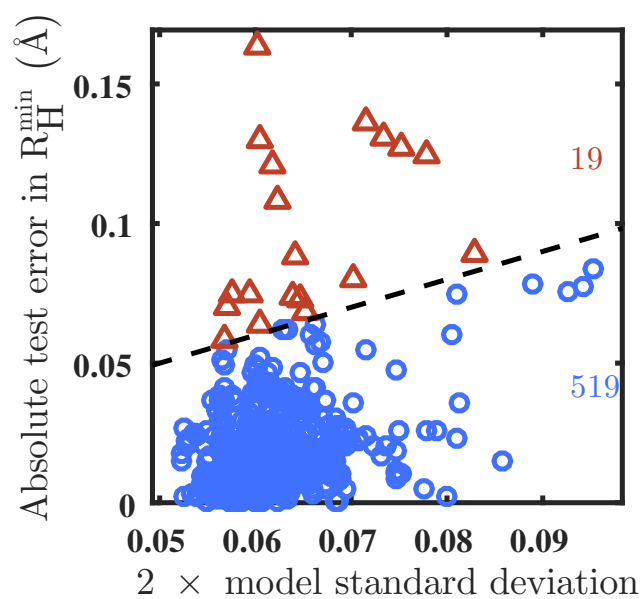

Figure S23: Parity plot for 2 standard deviation from the mean prediction and absolute prediction error for test case  $R_{HS}^{\min}$  prediction using ANN. All units are Å. The black line is  $y=x$ .



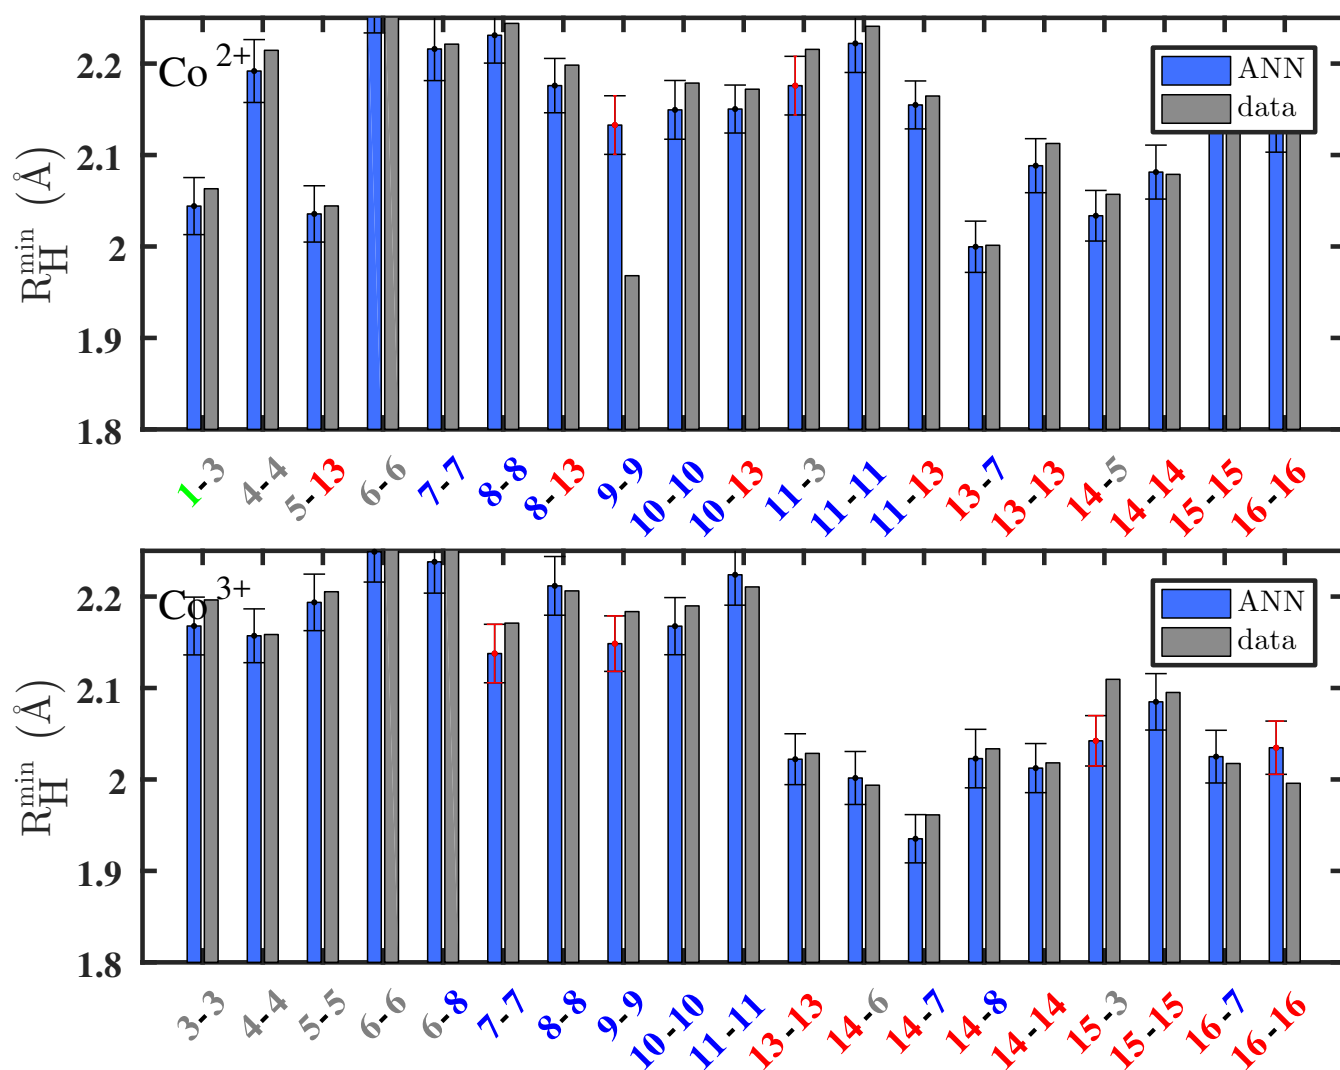

Figure S24: Model predictions of  $R_{HS}^{\min}$  and data for high-spin Co using an ANN. The ligands are described by two numbers indicating the equatorial first and then the axial, color coded by ligand identity (green for halogen, gray for carbon, blue for nitrogen, and red for oxygen). The error bars represent an estimated 1 standard deviation from the mean prediction.

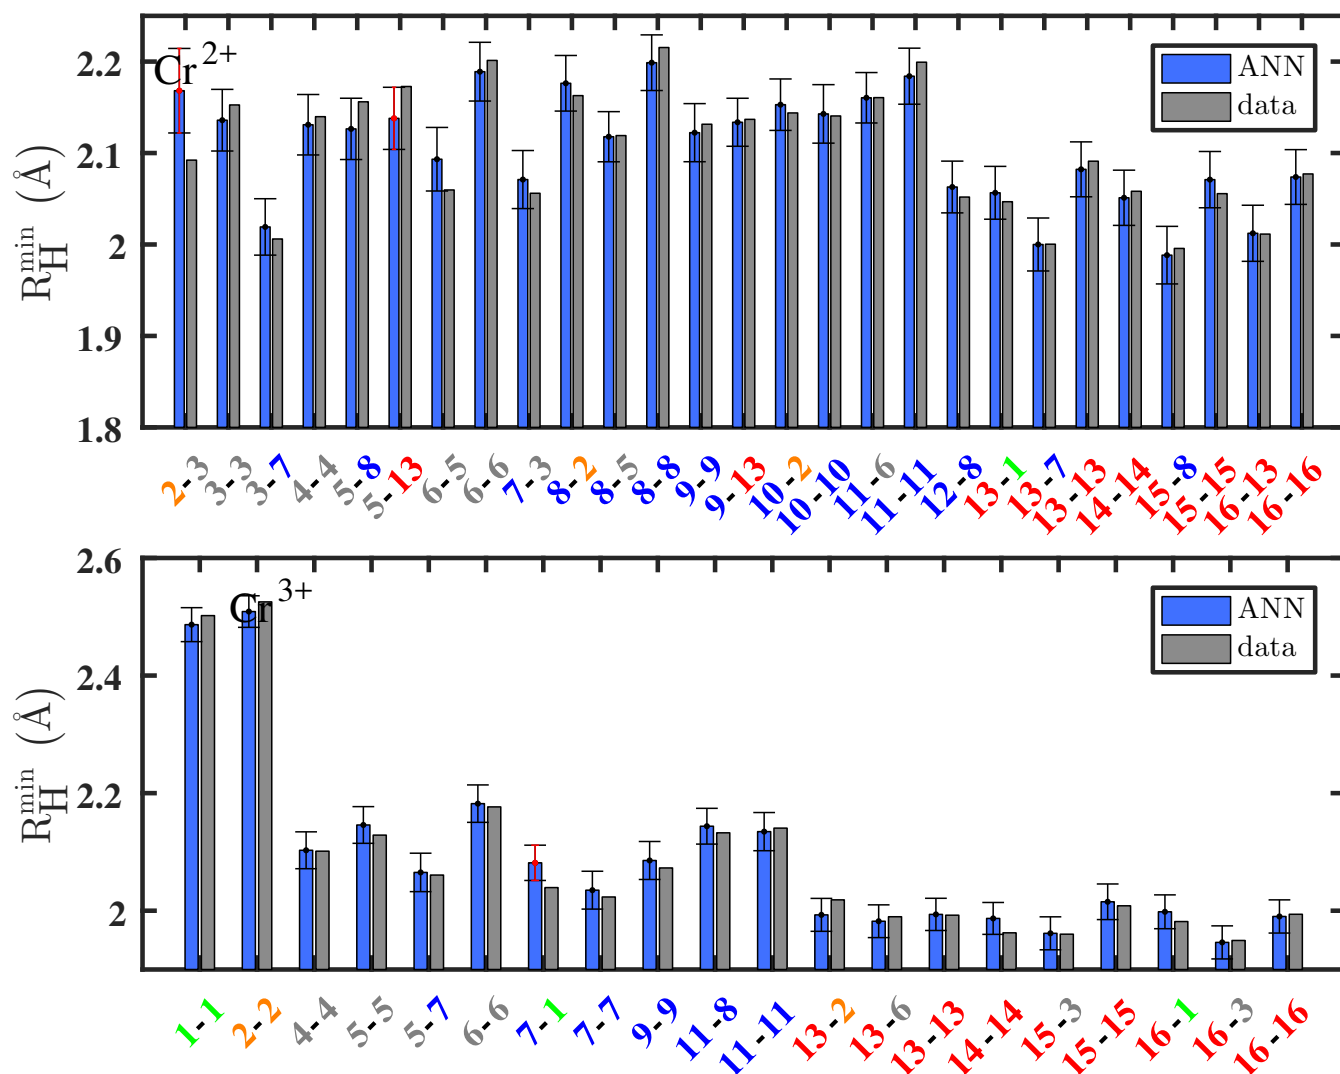

Figure S25: Model predictions of  $R_{\text{HS}}^{\text{min}}$  and data for high-spin Cr using an ANN. The ligands are described by two numbers indicating the equatorial first and then the axial, color coded by ligand identity (green for halogen, gray for carbon, blue for nitrogen, and red for oxygen). The error bars represent an estimated 1 standard deviation from the mean prediction.

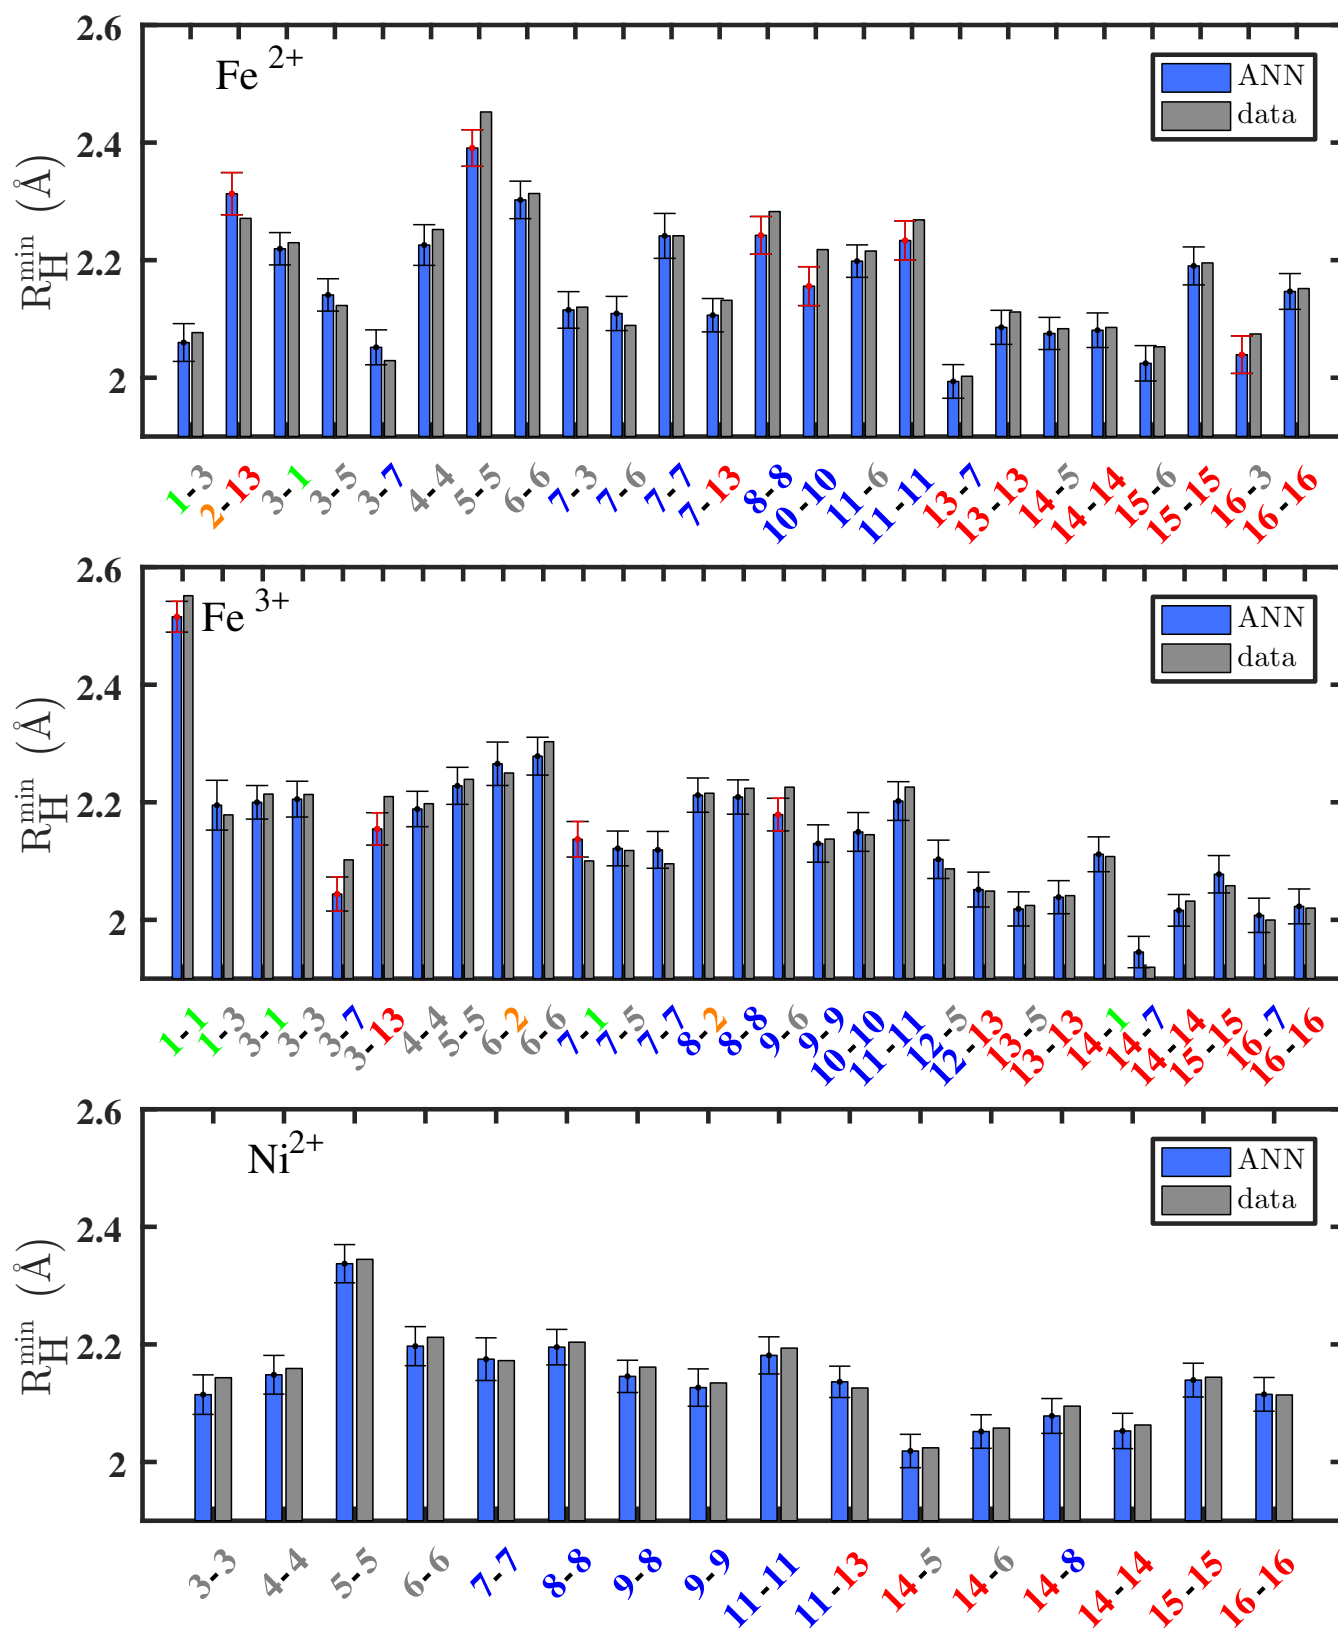

Figure S26: Model predictions of  $R_{HS}^{\min}$  and data for high-spin Fe(II) (top), Fe(III) (middle) and Ni(II) (bottom) using an ANN. The ligands are described by two numbers indicating the equatorial first and then the axial, color coded by ligand identity (green for halogen, gray for carbon, blue for nitrogen, and red for oxygen). The error bars represent an estimated 1 standard deviation from the mean prediction.

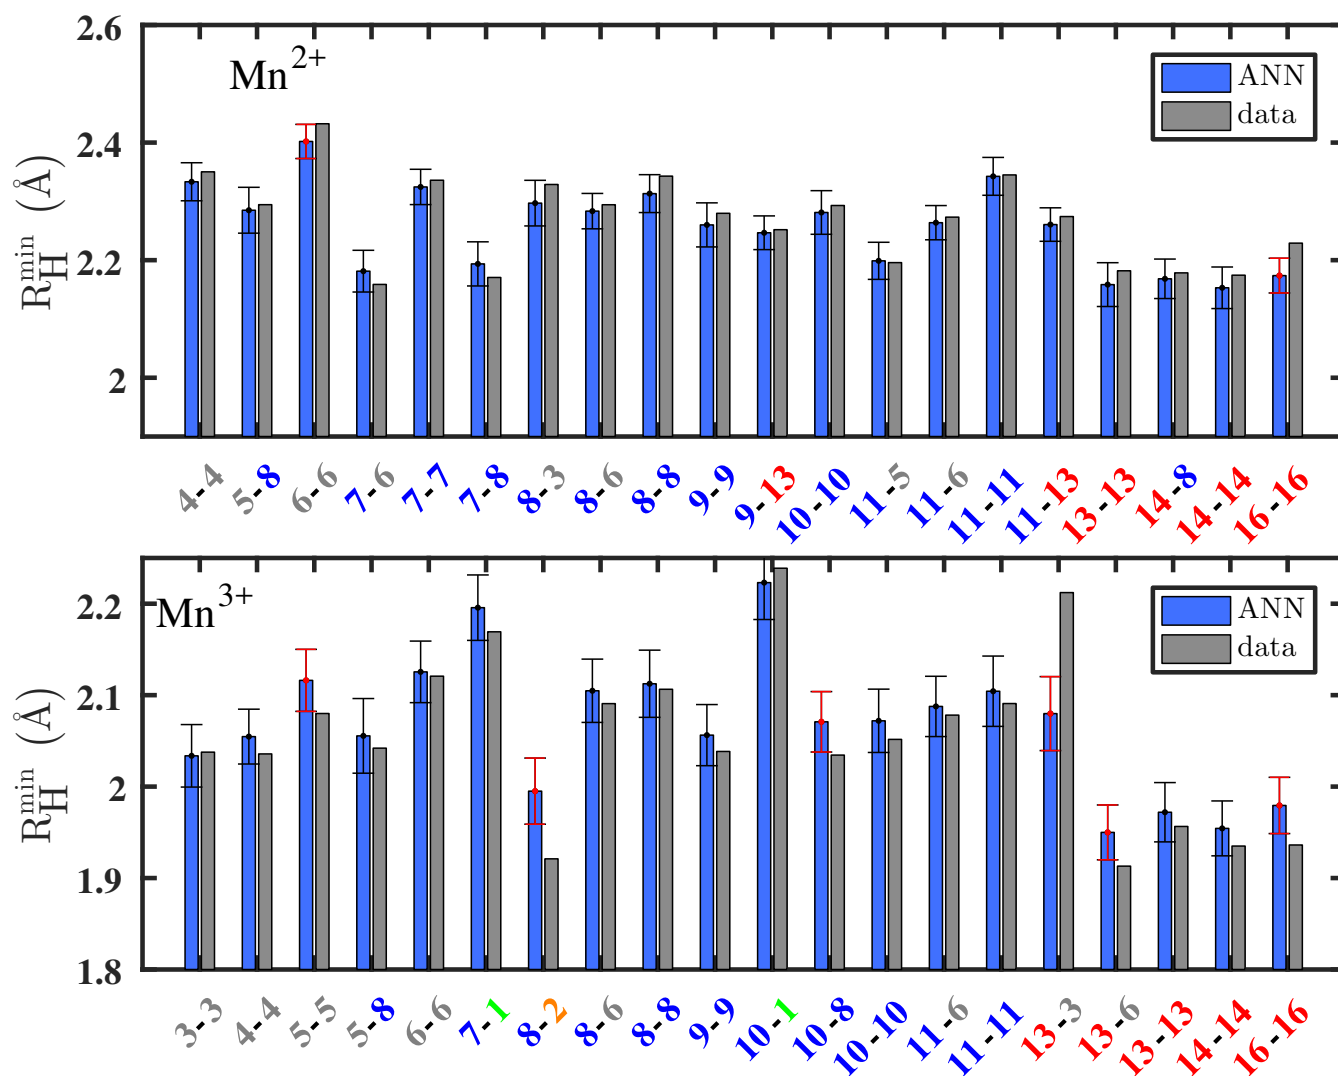

Figure S27: Model predictions of  $R_{HS}^{min}$  and data for high-spin Mn using an ANN. The ligands are described by two numbers indicating the equatorial first and then the axial, color coded by ligand identity (green for halogen, gray for carbon, blue for nitrogen, and red for oxygen). The error bars represent an estimated 1 standard deviation from the mean prediction.

Table S28: HS bond distance predictions and data in Å, compared for the full set of complexes. Each complex is named [metal oxidation axial ligand eq equatorial ligand]. For each complex, the first row has the data obtained from DFT using varying fractions of exact exchange ( $a_{\text{HF}}$ ) and the second row has the ANN predictions

| name                     |      | $a_{\text{HF}}$ |      |      |      |      |      |      |
|--------------------------|------|-----------------|------|------|------|------|------|------|
| name                     | type | 0               | 0.05 | 0.1  | 0.15 | 0.2  | 0.25 | 0.3  |
| cr 2 eq h2o ax ncs       | data | 1.98            | 1.98 | 1.99 | 2    | 2    | 2    | 2.01 |
|                          | pred | 1.99            | 2    | 2    | 2    | 2    | 2    | 2    |
| cr 2 eq porphyrin ax nh3 | data | 2.07            | 2.07 | 2.07 | 2.07 | 2.05 | 2.05 | 2.03 |
|                          | pred | 2.07            | 2.06 | 2.06 | 2.06 | 2.06 | 2.06 | 2.06 |
| cr 2 eq scn ax pisc      | data | 2.04            | 2.05 | 2.07 | 2.08 | 2.09 | 2.1  | 2.11 |
|                          | pred | 2.12            | 2.13 | 2.14 | 2.15 | 2.17 | 2.19 | 2.21 |
| cr 2 eq ncs ax pisc      | data | 2.02            | 2.04 | 2.04 | 2.05 | 2.06 | 2.06 | 2.07 |
|                          | pred | 2.06            | 2.06 | 2.06 | 2.07 | 2.07 | 2.07 | 2.08 |
| cr 2 eq cn ax nh3        | data | 2.12            | 2.13 | 2.14 | 2.15 | 2.16 | 2.19 | 2.2  |
|                          | pred | 2.12            | 2.12 | 2.12 | 2.12 | 2.13 | 2.13 | 2.13 |
| cr 2 eq tbuc ax tbuc     | data | 2.04            | 2.05 | 2.05 | 2.05 | 2.06 | 2.06 | 2.06 |
|                          | pred | 2.07            | 2.07 | 2.07 | 2.07 | 2.07 | 2.07 | 2.07 |
| cr 2 eq phen ax scn      | data | 2.13            | 2.14 | 2.14 | 2.14 | 2.14 | 2.15 | 2.15 |
|                          | pred | 2.14            | 2.14 | 2.14 | 2.15 | 2.15 | 2.16 | 2.16 |
| cr 2 eq en ax co         | data | 2.16            | 2.16 | 2.16 | 2.16 | 2.16 | 2.16 | 2.16 |
|                          | pred | 2.16            | 2.16 | 2.16 | 2.16 | 2.16 | 2.16 | 2.16 |
| cr 2 eq bipy ax bipy     | data | 2.1             | 2.12 | 2.12 | 2.13 | 2.13 | 2.13 | 2.14 |
|                          | pred | 2.12            | 2.12 | 2.12 | 2.12 | 2.12 | 2.12 | 2.12 |
| cr 2 eq en ax en         | data | 2.2             | 2.2  | 2.2  | 2.2  | 2.2  | 2.2  | 2.2  |
|                          | pred | 2.19            | 2.19 | 2.19 | 2.19 | 2.18 | 2.18 | 2.18 |
| cr 2 eq co ax cn         | data | 2.02            | 2.04 | 2.05 | 2.05 | 2.06 | 2.06 | 2.07 |
|                          | pred | 2.07            | 2.07 | 2.08 | 2.08 | 2.09 | 2.11 | 2.12 |
| cr 2 eq pisc ax pisc     | data | 2.11            | 2.12 | 2.13 | 2.14 | 2.15 | 2.16 | 2.17 |
|                          | pred | 2.11            | 2.12 | 2.12 | 2.13 | 2.14 | 2.14 | 2.15 |
| cr 2 eq ox ax h2o        | data | 2.01            | 2.01 | 2.01 | 2.01 | 2.01 | 2.01 | 2.01 |
|                          | pred | 2               | 2    | 2.01 | 2.01 | 2.01 | 2.02 | 2.02 |
| cr 2 eq h2o ax cl        | data | 2.05            | 2.05 | 2.05 | 2.05 | 2.05 | 2.05 | 2.05 |
|                          | pred | 2.06            | 2.06 | 2.06 | 2.06 | 2.06 | 2.06 | 2.06 |
| cr 2 eq nh3 ax scn       | data | 2.16            | 2.16 | 2.16 | 2.16 | 2.16 | 2.16 | 2.16 |
|                          | pred | 2.17            | 2.17 | 2.17 | 2.18 | 2.18 | 2.18 | 2.18 |
| cr 2 eq ox ax ox         | data | 2.07            | 2.07 | 2.07 | 2.08 | 2.08 | 2.08 | 2.08 |
|                          | pred | 2.07            | 2.07 | 2.07 | 2.07 | 2.07 | 2.08 | 2.08 |
| cr 2 eq h2o ax h2o       | data | 2.09            | 2.09 | 2.09 | 2.09 | 2.09 | 2.09 | 2.09 |
|                          | pred | 2.08            | 2.08 | 2.08 | 2.08 | 2.08 | 2.08 | 2.08 |
| cr 2 eq cn ax h2o        | data | 2.14            | 2.15 | 2.16 | 2.17 | 2.17 | 2.18 | 2.19 |
|                          | pred | 2.12            | 2.13 | 2.13 | 2.13 | 2.14 | 2.14 | 2.14 |
| cr 2 eq pisc ax ncs      | data | -               | 1.99 | 2    | 2    | 2.01 | 2.01 | 2.01 |
|                          | pred |                 | 2.01 | 2.01 | 2.02 | 2.02 | 2.02 | 2.02 |
| cr 2 eq acac ax acac     | data | 2.04            | 2.05 | 2.05 | 2.06 | 2.06 | 2.06 | 2.06 |
|                          | pred | 2.05            | 2.05 | 2.05 | 2.05 | 2.05 | 2.05 | 2.05 |
| cr 2 eq bipy ax h2o      | data | 2.12            | 2.13 | 2.13 | 2.13 | 2.14 | 2.14 | 2.14 |
|                          | pred | 2.14            | 2.14 | 2.13 | 2.13 | 2.13 | 2.13 | 2.13 |
| cr 2 eq nh3 ax nh3       | data | 2.21            | 2.21 | 2.21 | 2.21 | 2.22 | 2.21 | 2.21 |
|                          | pred | 2.2             | 2.2  | 2.2  | 2.2  | 2.2  | 2.2  | 2.2  |
| cr 2 eq co ax co         | data | 2.15            | 2.16 | 2.19 | 2.19 | 2.2  | 2.21 | 2.22 |
|                          | pred | 2.16            | 2.17 | 2.18 | 2.18 | 2.19 | 2.2  | 2.2  |
| cr 2 eq c2h3ns ax c2h3ns | data | 2.1             | 2.11 | 2.13 | 2.14 | 2.14 | 2.15 | 2.16 |
|                          | pred | 2.11            | 2.11 | 2.12 | 2.12 | 2.13 | 2.14 | 2.14 |
| cr 2 eq phen ax phen     | data | 2.12            | 2.13 | 2.13 | 2.14 | 2.14 | 2.14 | 2.15 |
|                          | pred | 2.14            | 2.14 | 2.14 | 2.14 | 2.14 | 2.14 | 2.15 |
| cr 2 eq tbuc ax nh3      | data | 1.99            | 1.99 | 2    | 1.99 | 2    | 1.99 | 2    |
|                          | pred | 1.99            | 1.99 | 1.99 | 1.99 | 1.99 | 1.99 | 1.99 |
| cr 2 eq nh3 ax cn        | data | 2.09            | 2.1  | 2.11 | 2.11 | 2.12 | 2.13 | 2.13 |
|                          | pred | 2.12            | 2.12 | 2.12 | 2.12 | 2.12 | 2.12 | 2.12 |
| cr 3 eq c2h3ns ax c2h3ns | data | 2.09            | 2.09 | 2.09 | 2.1  | 2.1  | 2.1  | 2.11 |
|                          | pred | 2.09            | 2.09 | 2.1  | 2.1  | 2.1  | 2.11 | 2.11 |
| cr 3 eq acac ax acac     | data | 1.97            | 1.97 | 1.97 | 1.96 | 1.96 | 1.96 | 1.97 |
|                          | pred | 1.99            | 1.99 | 1.99 | 1.99 | 1.99 | 1.99 | 1.98 |
| cr 3 eq h2o ax scn       | data | 2.04            | 2.03 | 2.03 | 2.02 | 2.02 | 2.02 | 2.01 |
|                          | pred | 2               | 2    | 2    | 2    | 1.99 | 1.99 | 1.99 |
| cr 3 eq en ax nh3        | data | 2.15            | 2.15 | 2.14 | 2.14 | 2.13 | 2.13 | 2.13 |
|                          | pred | 2.15            | 2.15 | 2.15 | 2.15 | 2.14 | 2.14 | 2.14 |
| cr 3 eq scn ax scn       | data | 2.53            | 2.53 | 2.53 | 2.52 | 2.53 | 2.52 | 2.52 |
|                          | pred | 2.51            | 2.51 | 2.51 | 2.51 | 2.51 | 2.51 | 2.51 |
| cr 3 eq en ax en         | data | 2.16            | 2.15 | 2.15 | 2.14 | 2.14 | 2.13 | 2.13 |
|                          | pred | 2.15            | 2.15 | 2.14 | 2.14 | 2.13 | 2.13 | 2.13 |
| cr 3 eq cn ax cn         | data | 2.12            | 2.12 | 2.12 | 2.13 | 2.13 | 2.13 | 2.13 |
|                          | pred | 2.14            | 2.14 | 2.15 | 2.15 | 2.15 | 2.14 | 2.14 |
| cr 3 eq cn ax ncs        | data | 2.05            | 2.05 | 2.06 | 2.06 | 2.06 | 2.06 | 2.07 |
|                          | pred | 2.04            | 2.05 | 2.05 | 2.06 | 2.07 | 2.07 | 2.08 |
| cr 3 eq tbuc ax tbuc     | data | -               | -    | 2.02 | 2.01 | 2.01 | 2    | 2    |
|                          | pred |                 |      | 2.02 | 2.02 | 2.02 | 2.01 | 2.01 |
| cr 3 eq ncs ax ncs       | data | 2.02            | 2.02 | 2.02 | 2.02 | 2.02 | 2.02 | 2.02 |
|                          | pred | 2.03            | 2.03 | 2.03 | 2.03 | 2.03 | 2.04 | 2.04 |
| cr 3 eq ox ax ox         | data | 2.01            | 2.01 | 2    | 2    | 1.99 | 1.99 | 1.99 |
|                          | pred | 2               | 2    | 1.99 | 1.99 | 1.99 | 1.99 | 1.99 |
| cr 3 eq cl ax cl         | data | 2.52            | 2.52 | 2.51 | 2.51 | 2.5  | 2.5  | 2.49 |
|                          | pred | 2.47            | 2.48 | 2.48 | 2.48 | 2.49 | 2.49 | 2.49 |

|                          |      |      |      |      |      |      |      |      |
|--------------------------|------|------|------|------|------|------|------|------|
| cr 3 eq co ax co         | data | 2.17 | 2.17 | 2.17 | 2.18 | 2.18 | 2.18 | 2.18 |
|                          | pred | 2.18 | 2.18 | 2.18 | 2.18 | 2.18 | 2.18 | 2.18 |
| cr 3 eq h2o ax co        | data | 2    | 2    | 2    | 1.99 | 1.99 | 1.99 | 1.99 |
|                          | pred | 2    | 1.99 | 1.99 | 1.98 | 1.98 | 1.98 | 1.98 |
| cr 3 eq bipy ax bipy     | data | 2.08 | 2.08 | 2.08 | 2.08 | 2.07 | 2.07 | 2.07 |
|                          | pred | 2.09 | 2.09 | 2.09 | 2.09 | 2.09 | 2.08 | 2.08 |
| cr 3 eq ncs ax cl        | data | 2.03 | 2.03 | 2.04 | 2.04 | 2.04 | 2.04 | 2.04 |
|                          | pred | 2.06 | 2.06 | 2.07 | 2.07 | 2.08 | 2.09 | 2.1  |
| cr 3 eq tbuc ax pisc     | data | 1.98 | 1.98 | 1.97 | 1.97 | 1.96 | 1.95 | 1.95 |
|                          | pred | 1.97 | 1.96 | 1.96 | 1.96 | 1.96 | 1.96 | 1.96 |
| cr 3 eq ox ax cl         | data | 2    | 1.99 | 1.99 | 1.99 | 1.98 | 1.98 | 1.97 |
|                          | pred | 1.99 | 1.99 | 2    | 2    | 2    | 2    | 2    |
| cr 3 eq h2o ax h2o       | data | 2    | 2    | 2    | 2    | 1.99 | 1.99 | 1.99 |
|                          | pred | 2    | 2    | 2    | 2    | 1.99 | 1.99 | 1.99 |
| cr 3 eq ox ax pisc       | data | 1.97 | 1.96 | 1.96 | 1.95 | 1.95 | 1.95 | 1.94 |
|                          | pred | 1.95 | 1.95 | 1.95 | 1.95 | 1.95 | 1.95 | 1.94 |
| mn 2 eq acac ax nh3      | data | 2.17 | 2.17 | 2.17 | 2.17 | 2.18 | 2.18 | 2.18 |
|                          | pred | 2.16 | 2.16 | 2.17 | 2.17 | 2.17 | 2.17 | 2.17 |
| mn 2 eq nh3 ax nh3       | data | 2.34 | 2.34 | 2.35 | 2.34 | 2.34 | 2.34 | 2.34 |
|                          | pred | 2.32 | 2.32 | 2.32 | 2.31 | 2.31 | 2.31 | 2.31 |
| mn 2 eq co ax co         | data | 2.41 | 2.42 | 2.43 | 2.43 | 2.43 | 2.43 | 2.43 |
|                          | pred | 2.38 | 2.39 | 2.39 | 2.4  | 2.4  | 2.41 | 2.41 |
| mn 2 eq cn ax nh3        | data | 2.17 | 2.27 | 2.28 | 2.29 | 2.29 | 2.3  | 2.31 |
|                          | pred | 2.26 | 2.26 | 2.27 | 2.28 | 2.28 | 2.29 | 2.3  |
| mn 2 eq en ax en         | data | 2.35 | 2.35 | 2.35 | 2.35 | 2.35 | 2.34 | 2.34 |
|                          | pred | 2.35 | 2.35 | 2.35 | 2.35 | 2.34 | 2.34 | 2.33 |
| mn 2 eq acac ax acac     | data | 2.18 | 2.18 | 2.18 | 2.18 | 2.17 | 2.17 | 2.17 |
|                          | pred | 2.16 | 2.16 | 2.16 | 2.15 | 2.15 | 2.15 | 2.15 |
| mn 2 eq en ax cn         | data | 2.16 | 2.17 | 2.18 | 2.19 | 2.2  | 2.2  | 2.2  |
|                          | pred | 2.19 | 2.19 | 2.2  | 2.2  | 2.2  | 2.2  | 2.2  |
| mn 2 eq bipy ax h2o      | data | 2.25 | 2.25 | 2.25 | 2.25 | 2.25 | 2.25 | 2.25 |
|                          | pred | 2.24 | 2.24 | 2.24 | 2.25 | 2.25 | 2.25 | 2.25 |
| mn 2 eq h2o ax h2o       | data | 2.18 | 2.18 | 2.18 | 2.18 | 2.18 | 2.18 | 2.18 |
|                          | pred | 2.16 | 2.16 | 2.16 | 2.16 | 2.16 | 2.16 | 2.16 |
| mn 2 eq ncs ax nh3       | data | 2.16 | 2.17 | 2.18 | 2.17 | 2.17 | 2.18 | 2.18 |
|                          | pred | 2.19 | 2.19 | 2.19 | 2.19 | 2.19 | 2.2  | 2.2  |
| mn 2 eq bipy ax bipy     | data | 2.28 | 2.28 | 2.28 | 2.28 | 2.28 | 2.28 | 2.28 |
|                          | pred | 2.27 | 2.27 | 2.27 | 2.26 | 2.26 | 2.26 | 2.25 |
| mn 2 eq ox ax ox         | data | 2.23 | 2.23 | 2.23 | 2.23 | 2.23 | -    | -    |
|                          | pred | 2.19 | 2.19 | 2.18 | 2.18 | 2.17 | -    | -    |
| mn 2 eq c2h3ns ax c2h3ns | data | 2.33 | 2.34 | 2.34 | 2.35 | 2.35 | 2.35 | 2.36 |
|                          | pred | 2.32 | 2.33 | 2.33 | 2.33 | 2.33 | 2.34 | 2.34 |
| mn 2 eq ncs ax co        | data | 2.15 | 2.16 | 2.16 | 2.16 | 2.16 | 2.16 | 2.16 |
|                          | pred | 2.17 | 2.18 | 2.18 | 2.18 | 2.18 | 2.18 | 2.19 |
| mn 2 eq ncs ax ncs       | data | 2.33 | 2.34 | 2.33 | 2.33 | 2.34 | 2.33 | 2.33 |
|                          | pred | 2.31 | 2.32 | 2.32 | 2.32 | 2.32 | 2.32 | 2.32 |
| mn 2 eq phen ax phen     | data | 2.3  | 2.3  | 2.3  | 2.29 | 2.29 | 2.29 | 2.29 |
|                          | pred | 2.29 | 2.29 | 2.29 | 2.28 | 2.28 | 2.28 | 2.28 |
| mn 2 eq nh3 ax co        | data | 2.3  | 2.3  | 2.3  | 2.3  | 2.29 | 2.29 | 2.29 |
|                          | pred | 2.28 | 2.28 | 2.28 | 2.28 | 2.28 | 2.28 | 2.28 |
| mn 2 eq en ax h2o        | data | 2.27 | 2.28 | 2.27 | 2.27 | 2.27 | 2.27 | 2.27 |
|                          | pred | 2.26 | 2.26 | 2.26 | 2.26 | 2.26 | 2.26 | 2.26 |
| mn 2 eq en ax co         | data | 2.28 | 2.28 | 2.28 | 2.27 | 2.27 | 2.27 | 2.27 |
|                          | pred | 2.26 | 2.26 | 2.26 | 2.26 | 2.26 | 2.26 | 2.26 |
| mn 2 eq nh3 ax pisc      | data | 2.29 | 2.3  | 2.31 | 2.32 | 2.33 | 2.34 | 2.34 |
|                          | pred | 2.27 | 2.28 | 2.29 | 2.29 | 2.3  | 2.3  | 2.31 |
| mn 3 eq en ax co         | data | 2.09 | 2.09 | 2.08 | 2.08 | 2.08 | 2.08 | 2.07 |
|                          | pred | 2.09 | 2.09 | 2.09 | 2.09 | 2.09 | 2.09 | 2.09 |
| mn 3 eq phen ax cl       | data | 2.12 | 2.12 | 2.24 | 2.24 | 2.24 | 2.24 | 2.24 |
|                          | pred | 2.17 | 2.18 | 2.2  | 2.21 | 2.22 | 2.24 | 2.25 |
| mn 3 eq phen ax phen     | data | 2.06 | 2.06 | 2.05 | 2.05 | 2.05 | 2.05 | 2.04 |
|                          | pred | 2.07 | 2.07 | 2.07 | 2.07 | 2.07 | 2.07 | 2.07 |
| mn 3 eq cn ax nh3        | data | 2.02 | 2.04 | 2.04 | 2.04 | 2.04 | 2.04 | 2.04 |
|                          | pred | 2.05 | 2.05 | 2.05 | 2.05 | 2.06 | 2.06 | 2.06 |
| mn 3 eq pisc ax pisc     | data | 2.01 | 2.02 | 2.02 | 2.03 | 2.04 | 2.04 | 2.04 |
|                          | pred | 2.02 | 2.03 | 2.03 | 2.03 | 2.03 | 2.04 | 2.04 |
| mn 3 eq ncs ax cl        | data | 2.17 | 2.17 | 2.17 | 2.17 | 2.17 | 2.17 | 2.16 |
|                          | pred | 2.17 | 2.18 | 2.18 | 2.19 | 2.2  | 2.2  | 2.21 |
| mn 3 eq h2o ax co        | data | 1.93 | 1.92 | 1.92 | 1.92 | 1.91 | 1.91 | 1.91 |
|                          | pred | 1.96 | 1.96 | 1.95 | 1.95 | 1.95 | 1.95 | 1.95 |
| mn 3 eq ox ax ox         | data | 1.95 | 1.95 | 1.94 | 1.94 | 1.94 | 1.93 | 1.93 |
|                          | pred | 1.99 | 1.98 | 1.98 | 1.98 | 1.98 | 1.98 | 1.98 |
| mn 3 eq co ax co         | data | 2.12 | 2.12 | 2.12 | 2.12 | 2.12 | 2.12 | 2.12 |
|                          | pred | 2.13 | 2.13 | 2.12 | 2.12 | 2.13 | 2.13 | 2.13 |
| mn 3 eq acac ax acac     | data | 1.95 | 1.94 | 1.94 | 1.94 | 1.93 | 1.93 | 1.93 |
|                          | pred | 1.97 | 1.96 | 1.96 | 1.96 | 1.95 | 1.95 | 1.95 |
| mn 3 eq nh3 ax nh3       | data | 2.12 | 2.12 | 2.12 | 2.11 | 2.11 | 2.1  | 2.1  |
|                          | pred | 2.12 | 2.12 | 2.12 | 2.11 | 2.11 | 2.11 | 2.11 |
| mn 3 eq nh3 ax co        | data | 2.11 | 2.11 | 2.1  | 2.1  | 2.09 | 2.09 | 2.09 |
|                          | pred | 2.12 | 2.11 | 2.11 | 2.11 | 2.1  | 2.1  | 2.1  |
| mn 3 eq cn ax cn         | data | 2.07 | 2.08 | 2.08 | 2.08 | 2.08 | 2.05 | 2.05 |
|                          | pred | 2.11 | 2.11 | 2.11 | 2.11 | 2.12 | 2.12 | 2.13 |
| mn 3 eq nh3 ax scn       | data | 1.89 | 1.89 | 1.91 | 1.92 | 1.92 | 1.93 | 1.94 |
|                          | pred | 2    | 2    | 2    | 1.99 | 2    | 2    | 2    |
| mn 3 eq bipy ax bipy     | data | 2.04 | 2.04 | 2.04 | 2.04 | 2.04 | 2.04 | 2.04 |
|                          | pred | 2.06 | 2.06 | 2.06 | 2.06 | 2.06 | 2.06 | 2.06 |
| mn 3 eq h2o ax pisc      | data | 2.23 | 2.23 | 2.22 | 2.22 | 2.21 | 2.21 | -    |
|                          | pred | 2.11 | 2.1  | 2.1  | 2.09 | 2.08 | 2.07 | -    |
| mn 3 eq en ax en         | data | 2.1  | 2.1  | 2.1  | 2.09 | 2.09 | 2.09 | 2.08 |
|                          | pred | 2.12 | 2.11 | 2.11 | 2.11 | 2.1  | 2.1  | 2.1  |

|                          |      |      |      |      |      |      |      |      |
|--------------------------|------|------|------|------|------|------|------|------|
| mn 3 eq phen ax nh3      | data | 2.04 | 2.03 | 2.04 | 2.03 | 2.03 | 2.03 | 2.03 |
|                          | pred | 2.07 | 2.07 | 2.07 | 2.07 | 2.07 | 2.07 | 2.07 |
| mn 3 eq h2o ax h2o       | data | 1.97 | 1.97 | 1.96 | 1.96 | 1.96 | 1.95 | 1.95 |
|                          | pred | 1.98 | 1.98 | 1.98 | 1.97 | 1.97 | 1.97 | 1.97 |
| mn 3 eq c2h3ns ax c2h3ns | data | 2.03 | 2.03 | 2.03 | 2.04 | 2.04 | 2.04 | 2.04 |
|                          | pred | 2.04 | 2.05 | 2.05 | 2.05 | 2.05 | 2.06 | 2.06 |
| fe 2 eq co ax co         | data | 2.27 | 2.29 | 2.3  | 2.31 | 2.31 | 2.33 | 2.33 |
|                          | pred | 2.28 | 2.28 | 2.29 | 2.3  | 2.3  | 2.31 | 2.31 |
| fe 2 eq acac ax acac     | data | 2.07 | 2.08 | 2.08 | 2.08 | 2.09 | 2.09 | 2.11 |
|                          | pred | 2.07 | 2.07 | 2.08 | 2.08 | 2.08 | 2.08 | 2.09 |
| fe 2 eq tbuc ax co       | data | 1.91 | 1.94 | 1.97 | 2.05 | 2.05 | 2.05 | 2.06 |
|                          | pred | 1.98 | 1.99 | 2    | 2.01 | 2.02 | 2.04 | 2.06 |
| fe 2 eq cn ax cn         | data | 2.44 | 2.45 | 2.45 | 2.45 | 2.45 | 2.45 | 2.46 |
|                          | pred | 2.36 | 2.37 | 2.38 | 2.39 | 2.39 | 2.39 | 2.4  |
| fe 2 eq tbuc ax tbuc     | data | 2.2  | 2.2  | 2.2  | 2.2  | 2.2  | 2.19 | -    |
|                          | pred | 2.19 | 2.19 | 2.19 | 2.19 | 2.19 | 2.19 | -    |
| fe 2 eq h2o ax ncs       | data | 1.96 | 1.97 | 1.98 | 1.99 | 2    | 2.01 | 2.01 |
|                          | pred | 1.99 | 1.99 | 1.99 | 1.99 | 1.99 | 2    | 2    |
| fe 2 eq en ax en         | data | 2.27 | 2.27 | 2.27 | 2.27 | 2.27 | 2.27 | 2.27 |
|                          | pred | 2.25 | 2.25 | 2.24 | 2.24 | 2.23 | 2.23 | 2.22 |
| fe 2 eq cl ax pisc       | data | 2.01 | 2.02 | 2.04 | 2.05 | 2.08 | 2.13 | 2.15 |
|                          | pred | 2.03 | 2.04 | 2.04 | 2.05 | 2.06 | 2.07 | 2.09 |
| fe 2 eq ncs ax h2o       | data | 2.04 | 2.05 | 2.05 | 2.13 | 2.13 | 2.13 | 2.14 |
|                          | pred | 2.09 | 2.09 | 2.09 | 2.1  | 2.11 | 2.11 | 2.12 |
| fe 2 eq pisc ax cl       | data | 2.17 | 2.18 | 2.19 | 2.21 | 2.23 | 2.24 | 2.25 |
|                          | pred | 2.19 | 2.2  | 2.21 | 2.21 | 2.22 | 2.23 | 2.24 |
| fe 2 eq phen ax phen     | data | 2.2  | 2.2  | 2.2  | 2.2  | 2.22 | 2.02 | 2.03 |
|                          | pred | 2.19 | 2.18 | 2.17 | 2.17 | 2.16 | 2.15 | 2.14 |
| fe 2 eq scn ax h2o       | data | 2.33 | 2.31 | 2.3  | 2.28 | 2.27 | 2.29 | 2.28 |
|                          | pred | 2.31 | 2.31 | 2.31 | 2.31 | 2.31 | 2.31 | 2.32 |
| fe 2 eq nh3 ax nh3       | data | 2.29 | 2.29 | 2.28 | 2.28 | 2.28 | 2.28 | 2.28 |
|                          | pred | 2.25 | 2.25 | 2.25 | 2.24 | 2.24 | 2.24 | 2.24 |
| fe 2 eq c2h3ns ax c2h3ns | data | 2.22 | 2.22 | 2.23 | 2.25 | 2.25 | 2.26 | 2.26 |
|                          | pred | 2.21 | 2.21 | 2.22 | 2.22 | 2.23 | 2.23 | 2.23 |
| fe 2 eq ox ax pisc       | data | 2.08 | 2.07 | 2.07 | 2.07 | 2.07 | 2.08 | 2.08 |
|                          | pred | 2.02 | 2.02 | 2.03 | 2.03 | 2.04 | 2.05 | 2.06 |
| fe 2 eq pisc ax cn       | data | 2.14 | 2.14 | 2.14 | 2.14 | 2.12 | 2.14 | 2.14 |
|                          | pred | 2.13 | 2.13 | 2.13 | 2.14 | 2.14 | 2.15 | 2.15 |
| fe 2 eq acac ax cn       | data | 2.06 | 2.07 | 2.08 | 2.09 | 2.08 | 2.1  | 2.1  |
|                          | pred | 2.06 | 2.06 | 2.07 | 2.07 | 2.08 | 2.08 | 2.08 |
| fe 2 eq ox ax ox         | data | 2.16 | 2.16 | 2.16 | 2.15 | 2.15 | 2.15 | 2.15 |
|                          | pred | 2.15 | 2.15 | 2.15 | 2.15 | 2.15 | 2.15 | 2.15 |
| fe 2 eq h2o ax h2o       | data | 2.11 | 2.11 | 2.11 | 2.11 | 2.11 | 2.11 | 2.11 |
|                          | pred | 2.08 | 2.08 | 2.08 | 2.08 | 2.09 | 2.09 | 2.09 |
| fe 2 eq ncs ax pisc      | data | 2.12 | 2.1  | 2.1  | 2.14 | 2.12 | -    | 2.12 |
|                          | pred | 2.11 | 2.11 | 2.11 | 2.11 | 2.12 | -    | 2.12 |
| fe 2 eq en ax co         | data | 2.24 | 2.23 | 2.22 | 2.22 | 2.22 | 2.21 | 2.21 |
|                          | pred | 2.2  | 2.2  | 2.2  | 2.2  | 2.2  | 2.2  | 2.2  |
| fe 2 eq pisc ax ncs      | data | 2.05 | 2.04 | 2.04 | 2.04 | 2.03 | 2.03 | 2.03 |
|                          | pred | 2.07 | 2.06 | 2.06 | 2.05 | 2.05 | 2.05 | 2.05 |
| fe 2 eq ncs ax co        | data | 2.13 | 2.12 | 2.11 | 2.1  | 2.09 | 2.09 | 2.09 |
|                          | pred | 2.11 | 2.11 | 2.11 | 2.11 | 2.11 | 2.11 | 2.11 |
| fe 2 eq ncs ax ncs       | data | 2.23 | 2.24 | 2.24 | 2.24 | 2.24 | 2.24 | 2.25 |
|                          | pred | 2.2  | 2.21 | 2.22 | 2.23 | 2.24 | 2.25 | 2.26 |
| fe 3 eq tbuc ax tbuc     | data | 2.09 | 2.08 | 2.07 | 2.06 | 2.06 | 2.05 | 2.05 |
|                          | pred | 2.09 | 2.09 | 2.08 | 2.08 | 2.08 | 2.07 | 2.07 |
| fe 3 eq cn ax cn         | data | 2.25 | 2.25 | 2.25 | 2.24 | 2.24 | 2.23 | 2.23 |
|                          | pred | 2.24 | 2.24 | 2.24 | 2.23 | 2.23 | 2.22 | 2.22 |
| fe 3 eq acac ax acac     | data | 2.06 | 2.05 | 2.05 | 2.04 | 2.03 | 2.02 | 2.02 |
|                          | pred | 2.04 | 2.03 | 2.02 | 2.02 | 2.02 | 2.01 | 2.01 |
| fe 3 eq porphyrin ax h2o | data | 2.05 | 2.05 | 2.05 | 2.05 | 2.05 | 2.04 | 2.03 |
|                          | pred | 2.06 | 2.06 | 2.06 | 2.05 | 2.05 | 2.05 | 2.05 |
| fe 3 eq h2o ax cn        | data | 2.02 | 2.02 | 2.02 | 2.02 | 2.02 | 2.02 | 2.02 |
|                          | pred | 2.02 | 2.02 | 2.02 | 2.02 | 2.02 | 2.02 | 2.02 |
| fe 3 eq porphyrin ax cn  | data | 2.09 | 2.09 | 2.09 | 2.09 | 2.09 | 2.08 | 2.08 |
|                          | pred | 2.1  | 2.1  | 2.1  | 2.1  | 2.1  | 2.1  | 2.1  |
| fe 3 eq co ax co         | data | 2.32 | 2.31 | 2.31 | 2.3  | 2.3  | 2.29 | 2.29 |
|                          | pred | 2.28 | 2.28 | 2.28 | 2.28 | 2.28 | 2.28 | 2.27 |
| fe 3 eq ox ax ox         | data | 2.04 | 2.04 | 2.03 | 2.03 | 2.02 | 2.02 | 2.01 |
|                          | pred | 2.04 | 2.03 | 2.03 | 2.03 | 2.02 | 2.02 | 2.02 |
| fe 3 eq pisc ax h2o      | data | 2.16 | 2.16 | 2.19 | 2.18 | 2.21 | 2.21 | 2.2  |
|                          | pred | 2.15 | 2.15 | 2.15 | 2.16 | 2.15 | 2.15 | 2.15 |
| fe 3 eq acac ax cl       | data | 2.14 | 2.13 | 2.12 | 2.11 | 2.11 | 2.11 | 2.1  |
|                          | pred | 2.11 | 2.11 | 2.11 | 2.11 | 2.11 | 2.11 | 2.11 |
| fe 3 eq ox ax ncs        | data | 2.03 | 2.02 | 2.01 | 2.01 | 2    | 1.99 | 1.99 |
|                          | pred | 2.02 | 2.02 | 2.01 | 2.01 | 2.01 | 2    | 2    |
| fe 3 eq en ax en         | data | 2.26 | 2.25 | 2.24 | 2.23 | 2.23 | 2.22 | 2.21 |
|                          | pred | 2.22 | 2.22 | 2.21 | 2.21 | 2.2  | 2.2  | 2.19 |
| fe 3 eq pisc ax pisc     | data | 2.17 | 2.19 | 2.19 | 2.2  | 2.21 | 2.25 | 2.23 |
|                          | pred | 2.18 | 2.19 | 2.2  | 2.2  | 2.21 | 2.21 | 2.21 |
| fe 3 eq bipy ax co       | data | 2.15 | 2.15 | 2.17 | 2.23 | 2.23 | 2.22 | 2.22 |
|                          | pred | 2.18 | 2.18 | 2.18 | 2.18 | 2.18 | 2.18 | 2.18 |
| fe 3 eq pisc ax ncs      | data | 2    | 1.97 | 1.96 | 1.95 | 2.1  | 2.1  | 2.11 |
|                          | pred | 2.05 | 2.05 | 2.04 | 2.04 | 2.04 | 2.04 | 2.05 |
| fe 3 eq ncs ax cl        | data | 2.12 | 2.11 | 2.11 | 2.1  | 2.1  | 2.1  | 2.09 |
|                          | pred | 2.14 | 2.14 | 2.14 | 2.14 | 2.14 | 2.14 | 2.14 |
| fe 3 eq phen ax phen     | data | 2.17 | 2.16 | 2.15 | 2.15 | 2.14 | 2.14 | 2.13 |
|                          | pred | 2.15 | 2.15 | 2.15 | 2.15 | 2.15 | 2.15 | 2.15 |
| fe 3 eq h2o ax h2o       | data | 2.07 | 2.06 | 2.05 | 2.05 | 2.04 | 2.04 | 2.03 |
|                          | pred | 2.05 | 2.05 | 2.04 | 2.04 | 2.04 | 2.04 | 2.03 |

|                          |      |      |      |      |      |      |      |      |
|--------------------------|------|------|------|------|------|------|------|------|
| fe 3 eq cl ax cl         | data | 2.58 | 2.57 | 2.57 | 2.56 | 2.55 | 2.54 | 2.54 |
|                          | pred | 2.51 | 2.51 | 2.51 | 2.52 | 2.52 | 2.52 | 2.52 |
| fe 3 eq pisc ax cl       | data | 2.18 | 2.19 | 2.2  | 2.21 | 2.21 | 2.21 | 2.21 |
|                          | pred | 2.19 | 2.2  | 2.2  | 2.2  | 2.2  | 2.2  | 2.2  |
| fe 3 eq c2h3ns ax c2h3ns | data | 2.2  | 2.2  | 2.2  | 2.2  | 2.2  | 2.19 | 2.2  |
|                          | pred | 2.19 | 2.19 | 2.19 | 2.19 | 2.19 | 2.19 | 2.19 |
| fe 3 eq nh3 ax scn       | data | 2.23 | 2.23 | 2.23 | 2.22 | 2.22 | 2.2  | 2.19 |
|                          | pred | 2.24 | 2.23 | 2.22 | 2.22 | 2.21 | 2.21 | 2.2  |
| fe 3 eq acac ax ncs      | data | 1.92 | 1.93 | 1.92 | 1.92 | 1.92 | 1.93 | 1.93 |
|                          | pred | 1.93 | 1.93 | 1.94 | 1.94 | 1.95 | 1.95 | 1.95 |
| fe 3 eq co ax scn        | data | -    | -    | 2.21 | 2.23 | 2.25 | 2.27 | 2.29 |
|                          | pred |      |      | 2.25 | 2.26 | 2.27 | 2.27 | 2.28 |
| fe 3 eq bipy ax bipy     | data | 2.14 | 2.14 | 2.14 | 2.14 | 2.14 | 2.13 | 2.13 |
|                          | pred | 2.14 | 2.14 | 2.13 | 2.13 | 2.13 | 2.13 | 2.13 |
| fe 3 eq ncs ax cn        | data | 2.14 | 2.14 | 2.13 | 2.12 | 2.12 | 2.11 | 2.11 |
|                          | pred | 2.12 | 2.12 | 2.12 | 2.12 | 2.12 | 2.12 | 2.12 |
| fe 3 eq ncs ax ncs       | data | 2.12 | 2.12 | 2.11 | 2.1  | 2.1  | 2.09 | 2.08 |
|                          | pred | 2.12 | 2.12 | 2.12 | 2.12 | 2.12 | 2.12 | 2.12 |
| fe 3 eq nh3 ax nh3       | data | 2.26 | 2.25 | 2.24 | 2.23 | 2.22 | 2.22 | 2.21 |
|                          | pred | 2.22 | 2.22 | 2.21 | 2.21 | 2.21 | 2.21 | 2.2  |
| fe 3 eq cl ax pisc       | data | 2.16 | 2.17 | 2.18 | 2.19 | 2.18 | 2.19 | 2.19 |
|                          | pred | 2.14 | 2.15 | 2.16 | 2.18 | 2.2  | 2.21 | 2.23 |
| co 2 eq ox ax ox         | data | 2.15 | 2.12 | 2.16 | 2.15 | 2.15 | 2.15 | 2.15 |
|                          | pred | 2.13 | 2.13 | 2.13 | 2.13 | 2.13 | 2.13 | 2.13 |
| co 2 eq en ax en         | data | 2.25 | 2.25 | 2.24 | 2.24 | 2.24 | 2.24 | 2.24 |
|                          | pred | 2.23 | 2.23 | 2.23 | 2.22 | 2.22 | 2.22 | 2.22 |
| co 2 eq tbuc ax tbuc     | data | 2.17 | 2.18 | 2.18 | 2.17 | 2.17 | 2.17 | 2.17 |
|                          | pred | 2.17 | 2.17 | 2.17 | 2.17 | 2.16 | 2.16 | 2.16 |
| co 2 eq cl ax pisc       | data | 1.94 | 1.97 | 2    | 2.03 | 2.06 | 2.09 | 2.11 |
|                          | pred | 2.02 | 2.03 | 2.03 | 2.04 | 2.04 | 2.06 | 2.07 |
| co 2 eq cn ax h2o        | data | 1.99 | 2.01 | 2.02 | 2.03 | 2.04 | 2.05 | 2.06 |
|                          | pred | 2.02 | 2.02 | 2.02 | 2.03 | 2.04 | 2.04 | 2.05 |
| co 2 eq en ax pisc       | data | 2.11 | 2.16 | 2.19 | 2.21 | 2.22 | 2.21 | 2.21 |
|                          | pred | 2.15 | 2.16 | 2.17 | 2.17 | 2.18 | 2.18 | 2.18 |
| co 2 eq phen ax h2o      | data | 2.16 | 2.16 | 2.16 | 2.15 | 2.17 | 2.17 | 2.15 |
|                          | pred | 2.15 | 2.15 | 2.15 | 2.15 | 2.15 | 2.15 | 2.15 |
| co 2 eq phen ax phen     | data | 2.15 | 2.16 | 2.16 | 2.18 | 2.18 | 2.18 | 2.18 |
|                          | pred | 2.17 | 2.16 | 2.16 | 2.15 | 2.15 | 2.15 | 2.14 |
| co 2 eq h2o ax ncs       | data | 1.97 | 1.98 | 1.98 | 1.99 | 2    | 2.01 | 2.01 |
|                          | pred | 2    | 2    | 2    | 2    | 2    | 2    | 2.01 |
| co 2 eq c2h3ns ax c2h3ns | data | 2.18 | 2.19 | 2.2  | 2.2  | 2.21 | 2.22 | 2.22 |
|                          | pred | 2.18 | 2.18 | 2.18 | 2.19 | 2.19 | 2.2  | 2.2  |
| co 2 eq nh3 ax nh3       | data | 2.25 | 2.25 | 2.25 | 2.24 | 2.24 | 2.24 | 2.24 |
|                          | pred | 2.24 | 2.24 | 2.23 | 2.23 | 2.23 | 2.23 | 2.23 |
| co 2 eq acac ax cn       | data | 2.03 | 2.03 | 2.04 | 2.05 | 2.06 | 2.06 | 2.06 |
|                          | pred | 2.02 | 2.02 | 2.03 | 2.03 | 2.03 | 2.04 | 2.04 |
| co 2 eq nh3 ax h2o       | data | 2.2  | 2.2  | 2.2  | 2.2  | 2.2  | 2.2  | 2.2  |
|                          | pred | 2.18 | 2.18 | 2.18 | 2.18 | 2.18 | 2.17 | 2.17 |
| co 2 eq acac ax acac     | data | 2.07 | 2.08 | 2.08 | 2.08 | 2.08 | 2.1  | 2.1  |
|                          | pred | 2.08 | 2.08 | 2.08 | 2.08 | 2.08 | 2.08 | 2.09 |
| co 2 eq ncs ax ncs       | data | 2.22 | 2.22 | 2.22 | 2.22 | 2.22 | 2.22 | 2.23 |
|                          | pred | 2.19 | 2.2  | 2.21 | 2.21 | 2.22 | 2.22 | 2.22 |
| co 2 eq bipy ax bipy     | data | 2.18 | 2.18 | 2.18 | 2.17 | 1.97 | -    | -    |
|                          | pred | 2.15 | 2.15 | 2.14 | 2.14 | 2.13 |      |      |
| co 2 eq co ax co         | data | 2.23 | 2.25 | 2.26 | 2.27 | 2.27 | 2.28 | 2.29 |
|                          | pred | 2.24 | 2.24 | 2.25 | 2.26 | 2.26 | 2.27 | 2.28 |
| co 2 eq en ax h2o        | data | 2.17 | 2.17 | 2.17 | 2.17 | 2.16 | 2.16 | 2.15 |
|                          | pred | 2.16 | 2.16 | 2.16 | 2.16 | 2.15 | 2.15 | 2.16 |
| co 2 eq h2o ax h2o       | data | 2.13 | 2.13 | 2.12 | 2.12 | 2.11 | 2.11 | 2.11 |
|                          | pred | 2.09 | 2.09 | 2.09 | 2.09 | 2.09 | 2.09 | 2.09 |
| co 3 eq co ax nh3        | data | -    | 2.26 | 2.26 | 2.26 | 2.25 | 2.25 | 2.24 |
|                          | pred |      | 2.23 | 2.24 | 2.24 | 2.24 | 2.24 | 2.24 |
| co 3 eq acac ax nh3      | data | 2.06 | 2.06 | 2.05 | 2.04 | 2.03 | 2.02 | 2.01 |
|                          | pred | 2.03 | 2.03 | 2.03 | 2.03 | 2.02 | 2.02 | 2.02 |
| co 3 eq tbuc ax pisc     | data | 1.98 | 2    | 2.04 | 2.08 | 2.11 | 2.1  | 2.05 |
|                          | pred | 2.01 | 2.02 | 2.02 | 2.03 | 2.04 | 2.05 | 2.05 |
| co 3 eq nh3 ax nh3       | data | 2.24 | 2.23 | 2.23 | 2.22 | 2.21 | 2.2  | 2.19 |
|                          | pred | 2.22 | 2.22 | 2.22 | 2.21 | 2.21 | 2.21 | 2.21 |
| co 3 eq ox ax ox         | data | 2.04 | 2.03 | 2.02 | 2.02 | 2    | 2    | 2    |
|                          | pred | 2.05 | 2.04 | 2.04 | 2.04 | 2.03 | 2.03 | 2.03 |
| co 3 eq en ax en         | data | 2.25 | 2.24 | 2.23 | 2.22 | 2.21 | 2.2  | 2.19 |
|                          | pred | 2.23 | 2.23 | 2.23 | 2.23 | 2.22 | 2.22 | 2.22 |
| co 3 eq acac ax acac     | data | 2.05 | 2.04 | 2.04 | 2.03 | 2.02 | 2.01 | 2    |
|                          | pred | 2.03 | 2.02 | 2.02 | 2.02 | 2.01 | 2.01 | 2.01 |
| co 3 eq phen ax phen     | data | 2.16 | 2.16 | 2.18 | 2.19 | 2.19 | 2.19 | 2.19 |
|                          | pred | 2.16 | 2.16 | 2.16 | 2.17 | 2.17 | 2.17 | 2.17 |
| co 3 eq cn ax cn         | data | 2.22 | 2.22 | 2.21 | 2.21 | 2.21 | 2.19 | 2.2  |
|                          | pred | 2.2  | 2.2  | 2.2  | 2.2  | 2.19 | 2.19 | 2.19 |
| co 3 eq c2h3ns ax c2h3ns | data | 2.15 | 2.16 | 2.16 | 2.16 | 2.16 | 2.16 | 2.16 |
|                          | pred | 2.16 | 2.16 | 2.16 | 2.16 | 2.16 | 2.16 | 2.16 |
| co 3 eq co ax co         | data | 2.29 | 2.28 | 2.28 | 2.27 | 2.26 | 2.26 | 2.25 |
|                          | pred | 2.25 | 2.25 | 2.25 | 2.25 | 2.25 | 2.25 | 2.24 |
| co 3 eq tbuc ax tbuc     | data | 2.09 | 2.09 | 2.08 | 2.07 | 2.1  | 2.11 | 2.11 |
|                          | pred | 2.09 | 2.09 | 2.09 | 2.09 | 2.08 | 2.08 | 2.08 |
| co 3 eq h2o ax h2o       | data | 2.07 | 2.06 | 2.05 | 2.04 | 2.03 | 2.02 | 2.01 |
|                          | pred | 2.03 | 2.03 | 2.03 | 2.02 | 2.02 | 2.02 | 2.02 |
| co 3 eq ncs ax ncs       | data | 2.11 | 2.11 | 2.11 | 2.12 | 2.17 | 2.17 | 2.17 |
|                          | pred | 2.13 | 2.13 | 2.13 | 2.14 | 2.14 | 2.14 | 2.14 |
| co 3 eq pisc ax pisc     | data | 2.13 | 2.15 | 2.17 | 2.19 | 2.2  | 2.2  | 2.21 |
|                          | pred | 2.14 | 2.15 | 2.15 | 2.16 | 2.17 | 2.17 | 2.18 |



|                          |      |      |      |      |      |      |      |      |
|--------------------------|------|------|------|------|------|------|------|------|
| co 3 eq bipy ax bipy     | data | 2.14 | 2.14 | 2.18 | 2.19 | 2.18 | 2.18 | 2.18 |
|                          | pred | 2.15 | 2.15 | 2.15 | 2.15 | 2.15 | 2.15 | 2.15 |
| co 3 eq acac ax ncs      | data | 1.89 | 1.9  | 1.9  | 1.93 | 1.96 | 1.98 | 2    |
|                          | pred | 1.92 | 1.92 | 1.93 | 1.93 | 1.94 | 1.94 | 1.95 |
| co 3 eq ox ax ncs        | data | 2.05 | 2.04 | 2.02 | 2.02 | 2.02 | 2.02 | 2.02 |
|                          | pred | 2.04 | 2.04 | 2.04 | 2.03 | 2.02 | 2.02 | 2.01 |
| co 3 eq acac ax co       | data | 2.02 | 2.01 | 2    | 2    | 1.99 | 1.99 | 1.99 |
|                          | pred | 2.02 | 2.01 | 2.01 | 2.01 | 2    | 2    | 2    |
| ni 2 eq tbuc ax tbuc     | data | 2.16 | 2.16 | 2.15 | 2.14 | 2.14 | 2.14 | 2.14 |
|                          | pred | 2.15 | 2.15 | 2.14 | 2.14 | 2.14 | 2.14 | 2.13 |
| ni 2 eq bipy ax nh3      | data | 2.16 | 2.16 | 2.16 | 2.16 | 2.16 | 2.16 | 2.16 |
|                          | pred | 2.15 | 2.15 | 2.15 | 2.15 | 2.15 | 2.14 | 2.14 |
| ni 2 eq en ax en         | data | 2.21 | 2.2  | 2.2  | 2.2  | 2.19 | 2.19 | 2.19 |
|                          | pred | 2.2  | 2.19 | 2.19 | 2.19 | 2.18 | 2.18 | 2.17 |
| ni 2 eq co ax co         | data | 2.17 | 2.19 | 2.19 | 2.2  | 2.21 | 2.21 | 2.22 |
|                          | pred | 2.17 | 2.17 | 2.18 | 2.19 | 2.2  | 2.21 | 2.22 |
| ni 2 eq nh3 ax nh3       | data | 2.21 | 2.21 | 2.21 | 2.21 | 2.2  | 2.2  | 2.2  |
|                          | pred | 2.2  | 2.2  | 2.2  | 2.2  | 2.2  | 2.19 | 2.19 |
| ni 2 eq acac ax cn       | data | 2.01 | 2.01 | 2.02 | 2.02 | 2.02 | 2.03 | 2.03 |
|                          | pred | 2.01 | 2.01 | 2.01 | 2.02 | 2.02 | 2.02 | 2.02 |
| ni 2 eq pisc ax pisc     | data | 2.11 | 2.12 | 2.13 | 2.14 | 2.14 | 2.15 | 2.16 |
|                          | pred | 2.09 | 2.09 | 2.1  | 2.11 | 2.11 | 2.12 | 2.13 |
| ni 2 eq en ax h2o        | data | 2.13 | 2.13 | 2.13 | 2.13 | 2.13 | 2.12 | 2.12 |
|                          | pred | 2.14 | 2.14 | 2.14 | 2.14 | 2.14 | 2.14 | 2.14 |
| ni 2 eq bipy ax bipy     | data | 2.13 | 2.13 | 2.13 | 2.13 | 2.13 | 2.13 | 2.13 |
|                          | pred | 2.13 | 2.13 | 2.13 | 2.13 | 2.13 | 2.13 | 2.12 |
| ni 2 eq ncs ax ncs       | data | 2.17 | 2.17 | 2.17 | 2.17 | 2.17 | 2.17 | 2.18 |
|                          | pred | 2.17 | 2.17 | 2.17 | 2.17 | 2.17 | 2.17 | 2.17 |
| ni 2 eq cn ax cn         | data | -    | -    | 2.34 | 2.34 | 2.34 | 2.35 | 2.35 |
|                          | pred |      |      | 2.33 | 2.33 | 2.34 | 2.34 | 2.34 |
| ni 2 eq acac ax co       | data | 2.08 | 2.09 | 2.08 | 2.07 | 2.06 | 2.05 | 2.05 |
|                          | pred | 2.05 | 2.05 | 2.05 | 2.05 | 2.05 | 2.05 | 2.06 |
| ni 2 eq c2h3ns ax c2h3ns | data | 2.13 | 2.13 | 2.14 | 2.15 | 2.16 | 2.16 | 2.17 |
|                          | pred | 2.13 | 2.14 | 2.14 | 2.14 | 2.15 | 2.15 | 2.16 |
| ni 2 eq acac ax nh3      | data | 2.1  | 2.1  | 2.1  | 2.1  | 2.1  | 2.09 | 2.09 |
|                          | pred | 2.08 | 2.08 | 2.08 | 2.08 | 2.08 | 2.08 | 2.08 |
| ni 2 eq acac ax acac     | data | 2.05 | 2.05 | 2.07 | 2.07 | 2.06 | 2.06 | 2.06 |
|                          | pred | 2.06 | 2.06 | 2.06 | 2.05 | 2.05 | 2.05 | 2.05 |
| ni 2 eq ox ax ox         | data | 2.13 | 2.13 | 2.12 | 2.12 | 2.11 | 2.11 | 2.11 |
|                          | pred | 2.12 | 2.12 | 2.12 | 2.12 | 2.12 | 2.11 | 2.11 |

Table S29: RMSEs and MUEs (in Å) for minimum metal-ligand bond length prediction on test data by metal and oxidation state for both min(RLS) and min(RHS). The number of test cases is indicated in parentheses.

| Species | RMSE (Å)  |           | MUE (Å)  |          |
|---------|-----------|-----------|----------|----------|
|         | min(RLS)  | min(RHS)  | min(RLS) | min(RHS) |
| Cr(II)  | 0.02 (68) | 0.02 (78) | 0.02     | 0.01     |
| Cr(III) | 0.02 (54) | 0.02 (54) | 0.01     | 0.01     |
| Mn(II)  | 0.02 (65) | 0.03 (49) | 0.02     | 0.02     |
| Mn(III) | 0.02 (60) | 0.05 (59) | 0.01     | 0.03     |
| Fe(II)  | 0.02 (64) | 0.03 (59) | 0.01     | 0.03     |
| Fe(III) | 0.02 (84) | 0.03 (88) | 0.01     | 0.02     |
| Co(II)  | 0.03 (55) | 0.04 (53) | 0.02     | 0.03     |
| Co(III) | 0.02 (52) | 0.02 (51) | 0.02     | 0.02     |
| Ni(II)  | 0.01 (36) | 0.02 (47) | 0.01     | 0.01     |

Table S30: molSimplify initial structure projected (g) gradients and RMS gradients with and without preliminary ANN assisted bond lengths

| name                   |         | g (kcal/Å) | RMS grad. (Hartree/Bohr) |
|------------------------|---------|------------|--------------------------|
| Co (acac) <sub>3</sub> | default | -52        | 0.0487                   |
|                        | ANN     | -5         | 0.0490                   |
| Cr (bipy) <sub>3</sub> | default | -48        | 0.0237                   |
|                        | ANN     | 29         | 0.0161                   |
| Fe (acac) <sub>3</sub> | default | -50        | 0.0429                   |
|                        | ANN     | 23         | 0.0437                   |
| Mn (misc) <sub>3</sub> | default | -57        | 0.0459                   |
|                        | ANN     | -53        | 0.0454                   |

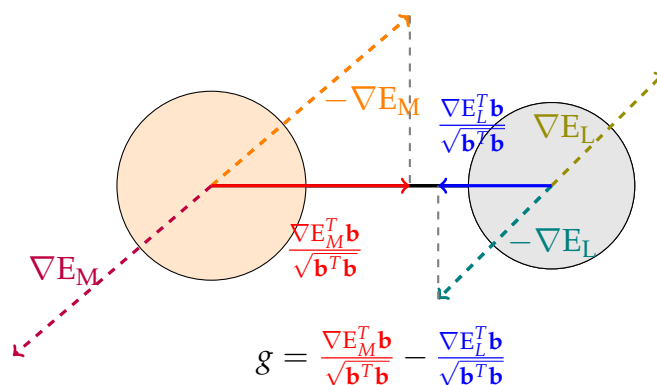

Figure S28: Illustration showing definition of bond projected gradient, g, used to estimate the closeness of an initial geometry to equilibrium. The projected gradient is the scalar difference between the component of the negative energy gradient projected into the vector joining nuclear positions of the metal (larger orange circle) and the ligand (smaller grey circle).

Table S31: Spin splitting energy predictions and data in kcal/mol, for the CSD test structures. For each complex, values from DFT using B3LYP and ANN predictions are shown, along with the standard deviation of the ANN model

| Test number | ANN    | DFT/B3LYP | ANN Std. Dev. | Error  |
|-------------|--------|-----------|---------------|--------|
| 1           | 21.80  | 29.06     | 3.29          | -7.81  |
| 2           | 21.90  | 14.20     | 3.28          | 7.70   |
| 3           | -26.50 | -23.90    | 3.25          | -2.66  |
| 4           | 28.70  | 34.10     | 3.65          | -5.35  |
| 5           | 32.90  | 35.10     | 3.46          | -2.18  |
| 6           | -17.00 | -11.50    | 3.87          | -5.53  |
| 7           | 12.60  | 35.2      | 4.25          | -22.60 |
| 8           | -13.80 | -16.40    | 4.14          | 2.61   |
| 9           | 30.60  | 0.26      | 3.77          | 30.40  |
| 10          | -44.50 | -40.90    | 3.27          | -3.61  |
| 11          | -31.20 | -15.20    | 3.74          | -16.00 |
| 12          | 4.50   | -23.2     | 5.29          | 27.70  |
| 13          | -13.10 | -16.70    | 4.00          | 3.62   |
| 14          | 28.30  | 30.70     | 4.60          | -2.38  |
| 15          | -61.00 | -45.10    | 3.08          | -15.9  |
| 16          | 44.40  | 69.70     | 5.06          | -25.30 |
| 17          | 6.92   | 3.51      | 3.92          | 3.41   |
| 18          | -19.50 | -6.35     | 3.25          | -13.10 |
| 19          | -11.50 | -3.14     | 4.27          | -8.32  |
| 20          | -21.90 | -15.00    | 3.69          | -6.93  |
| 21          | -5.78  | -1.69     | 3.23          | -4.10  |
| 22          | -11.70 | -8.49     | 3.91          | -3.19  |
| 23          | -4.20  | -5.36     | 3.52          | 1.16   |
| 24          | 6.44   | 2.57      | 3.46          | 3.87   |
| 25          | 9.44   | -0.23     | 4.73          | 9.67   |
| 26          | -7.91  | -24.40    | 4.00          | 16.40  |
| 27          | 0.54   | 3.59      | 3.24          | -3.04  |
| 28          | -13.40 | -36.90    | 5.56          | 23.50  |
| 29          | -6.85  | -23.90    | 3.30          | 17.10  |
| 30          | -15.60 | -17.20    | 3.76          | 1.63   |
| 31          | -28.20 | -38.30    | 3.26          | 10.10  |
| 32          | -10.00 | -8.98     | 3.60          | -1.03  |
| 33          | 4.50   | -23.40    | 5.29          | 27.90  |
| 34          | -22.00 | -24.00    | 3.29          | 2.01   |
| 35          | -13.90 | -22.40    | 4.03          | 8.55   |

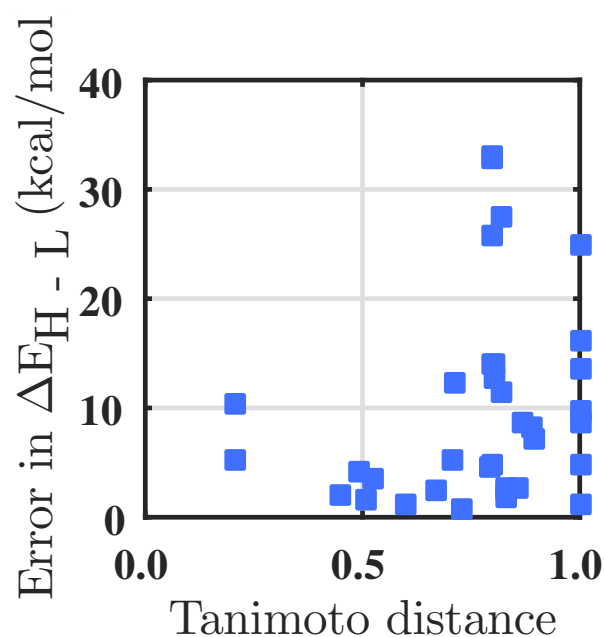

Figure S29: Dissimilarity metrics for CSD data: errors in spin energy predictions for CSD structures are on the y-axis in kcal/mol and the minimum Tanimoto/FP2 dissimilarity metric (1 - the Tanimoto index) between the CSD ligands and the training ligands is shown on the x-axis. A value of 1 indicates no matches with the FP2 fingerprint.

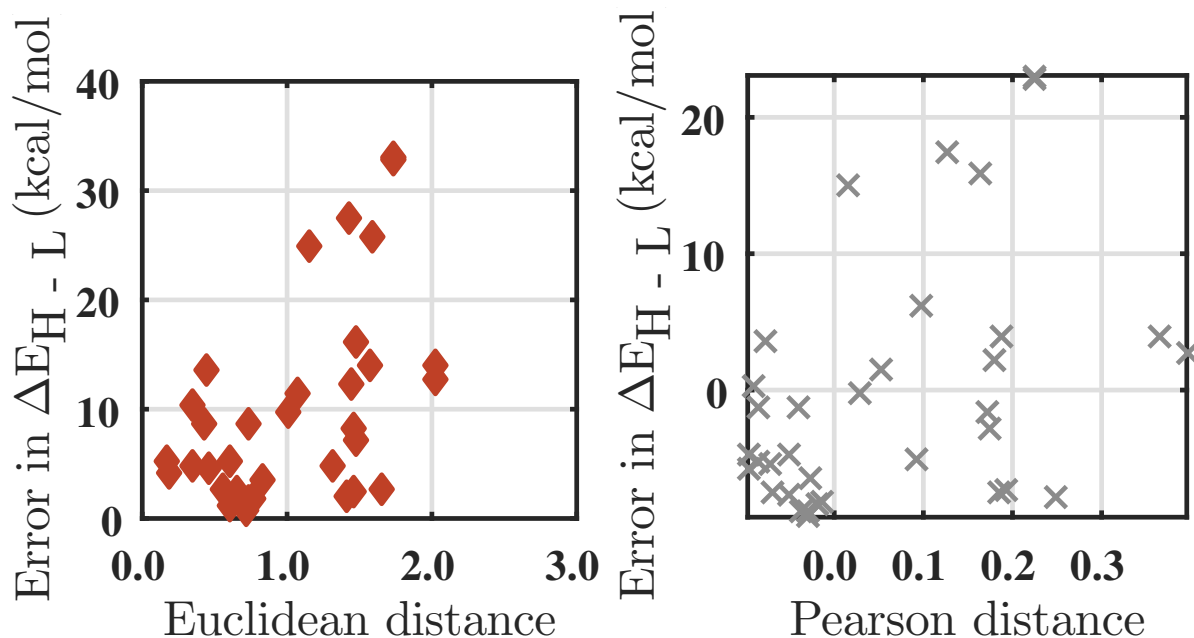

Figure S30: Comparison of dissimilarity metrics for CSD data: errors in spin energy predictions for CSD structures are on the y-axis in kcal/mol and the Euclidean (left, red) and uncentered Pearson distances (gray, right) between the CSD structure and its nearest representation in dimensionless descriptor space is shown on the x-axis.

Table S32: LS bond distance predictions and data in Å, for the CSD test structures. For each complex, values from DFT using B3LYP and ANN predictions are shown, along with the standard deviation of the ANN model

| Test number | ANN  | DFT/B3LYP | ANN Std. Dev. | Error |
|-------------|------|-----------|---------------|-------|
| testno      | nn   | data      | variance      | error |
| 1           | 2.01 | 1.95      | 0.02          | 0.06  |
| 2           | 2.01 | 1.90      | 0.02          | 0.11  |
| 3           | 1.97 | 2.06      | 0.03          | -0.10 |
| 4           | 1.98 | 1.95      | 0.03          | 0.04  |
| 5           | 1.98 | 2.00      | 0.03          | -0.02 |
| 6           | 1.99 | 1.97      | 0.03          | 0.03  |
| 7           | 1.97 | 1.96      | 0.02          | 0.01  |
| 8           | 2.02 | 2.07      | 0.03          | -0.05 |
| 9           | 1.99 | 2.03      | 0.03          | -0.03 |
| 10          | 2.02 | 2.03      | 0.03          | -0.01 |
| 11          | 1.89 | 1.99      | 0.03          | -0.10 |
| 12          | 2.03 | 2.04      | 0.02          | -0.02 |
| 13          | 1.91 | 1.89      | 0.03          | 0.02  |
| 14          | 2.02 | 1.95      | 0.03          | 0.07  |
| 15          | 2.04 | 2.08      | 0.03          | -0.05 |
| 16          | 1.99 | 1.91      | 0.03          | 0.09  |
| 17          | 2.04 | 2.01      | 0.03          | 0.03  |
| 18          | 1.94 | 2.00      | 0.02          | -0.06 |
| 19          | 1.90 | 1.88      | 0.03          | 0.02  |
| 20          | 2.08 | 2.05      | 0.03          | 0.03  |
| 21          | 2.08 | 2.04      | 0.02          | 0.03  |
| 22          | 2.05 | 1.98      | 0.02          | 0.07  |
| 23          | 1.94 | 1.91      | 0.03          | 0.03  |
| 24          | 2.05 | 2.03      | 0.02          | 0.02  |
| 25          | 1.98 | 1.99      | 0.03          | -0.01 |
| 26          | 2.00 | 1.94      | 0.03          | 0.06  |
| 27          | 2.04 | 1.97      | 0.02          | 0.06  |
| 28          | 2.01 | 2.08      | 0.02          | -0.07 |
| 29          | 1.99 | 2.04      | 0.3           | -0.05 |
| 30          | 1.88 | 2.04      | 0.03          | -0.17 |
| 31          | 2.10 | 2.09      | 0.02          | 0.01  |
| 32          | 1.99 | 2.02      | 0.03          | -0.03 |
| 33          | 2.03 | 2.04      | 0.02          | -0.01 |
| 34          | 2.08 | 2.01      | 0.02          | 0.07  |
| 35          | 2.16 | 1.98      | 0.02          | 0.19  |

Table S33: HS bond distance predictions and data in Å, for the CSD test structures. For each complex, values from DFT using B3LYP and ANN predictions are shown, along with the standard deviation of the ANN model

| Test Number | ANN  | DFT/B3LYP | ANN Std. Dev. | Error |
|-------------|------|-----------|---------------|-------|
| 1           | 2.06 | 1.95      | 0.02          | 0.11  |
| 2           | 2.06 | 1.87      | 0.02          | 0.16  |
| 3           | 1.94 | 2.07      | 0.02          | -0.12 |
| 4           | 2.02 | 2.01      | 0.02          | 0.016 |
| 5           | 2.05 | 2.13      | 0.02          | -0.08 |
| 6           | 2.02 | 2.06      | 0.02          | -0.04 |
| 7           | 2.06 | 2.03      | 0.02          | 0.03  |
| 8           | 2.09 | 2.32      | 0.02          | -0.23 |
| 9           | 2.00 | 2.05      | 0.02          | -0.04 |
| 10          | 2.15 | 2.12      | 0.03          | 0.03  |
| 11          | 1.96 | 2.03      | 0.02          | -0.07 |
| 12          | 1.98 | 2.06      | 0.02          | -0.08 |
| 13          | 2.02 | 1.94      | 0.02          | 0.09  |
| 14          | 2.00 | 2.08      | 0.02          | -0.08 |
| 15          | 2.21 | 2.22      | 0.02          | -0.01 |
| 16          | 2.07 | 1.91      | 0.02          | 0.16  |
| 17          | 2.06 | 2.01      | 0.02          | 0.06  |
| 18          | 2.14 | 2.13      | 0.02          | 0.01  |
| 19          | 2.02 | 1.98      | 0.02          | 0.04  |
| 20          | 2.11 | 2.19      | 0.02          | -0.08 |
| 21          | 2.23 | 2.05      | 0.02          | 0.187 |
| 22          | 2.09 | 2.07      | 0.02          | 0.02  |
| 23          | 2.12 | 2.03      | 0.02          | 0.10  |
| 24          | 2.24 | 2.16      | 0.02          | 0.08  |
| 25          | 1.99 | 2.02      | 0.02          | -0.02 |
| 26          | 2.03 | 1.96      | 0.02          | 0.07  |
| 27          | 2.15 | 2.17      | 0.02          | -0.02 |
| 28          | 2.13 | 2.26      | 0.02          | -0.13 |
| 29          | 2.03 | 2.07      | 0.02          | -0.03 |
| 30          | 2.12 | 2.08      | 0.02          | 0.04  |
| 31          | 2.28 | 2.25      | 0.02          | 0.03  |
| 32          | 2.19 | 2.22      | 0.02          | -0.03 |
| 33          | 1.98 | 2.06      | 0.02          | -0.09 |
| 34          | 2.09 | 2.02      | 0.02          | 0.07  |
| 35          | 2.21 | 1.99      | 0.02          | 0.22  |

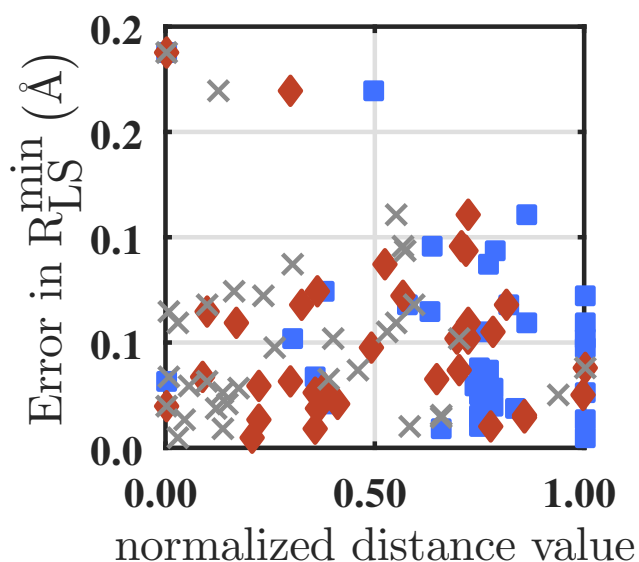

Figure S31: Comparison of dissimilarity metrics for CSD data: errors in LS bond length prediction for CSD structures are shown on the y-axis in Å, and three normalized dissimilarity metrics are compared on the x-axis: the Tanimoto/FP2 dissimilarity metric between the CSD ligands and the training ligands (blue circles), and the Euclidean (red diamonds) and uncentered Pearson distances (gray crosses) between the CSD structure and its nearest representation in dimensionless descriptor space.

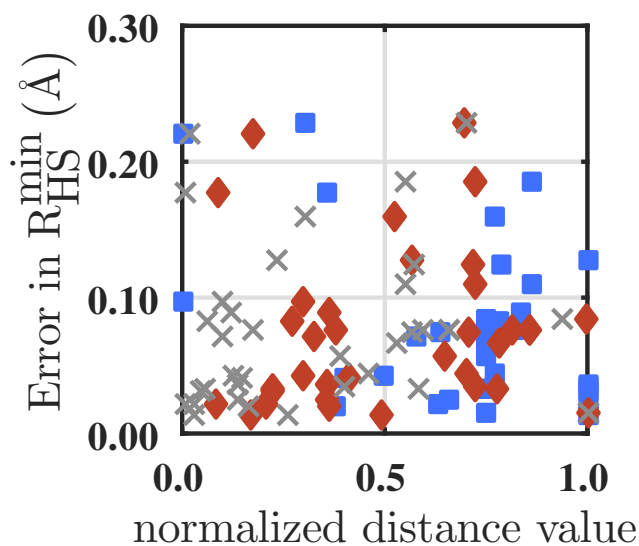

Figure S32: Comparison of dissimilarity metrics for CSD data: errors in HS bond length prediction for CSD structures are shown on the y-axis in Å, and three normalized dissimilarity metrics are compared on the x-axis: the Tanimoto/FP2 dissimilarity metric between the CSD ligands and the training ligands (blue circles), and the Euclidean (red diamonds) and uncentered Pearson distances (gray crosses) between the CSD structure and its nearest representation in dimensionless descriptor space.

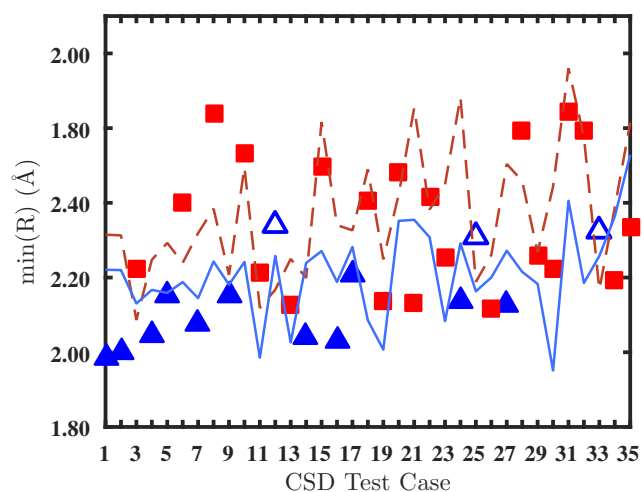

Figure S33: Comparison of measured CSD bond distances in the crystal phase, represented by symbols (red squares for high-spin or blue triangles for low-spin based on DFT assignment at  $a_{\text{HF}}=0.20$ ) with the ANN predicted HS (red line) and LS (blue line) bond distances.

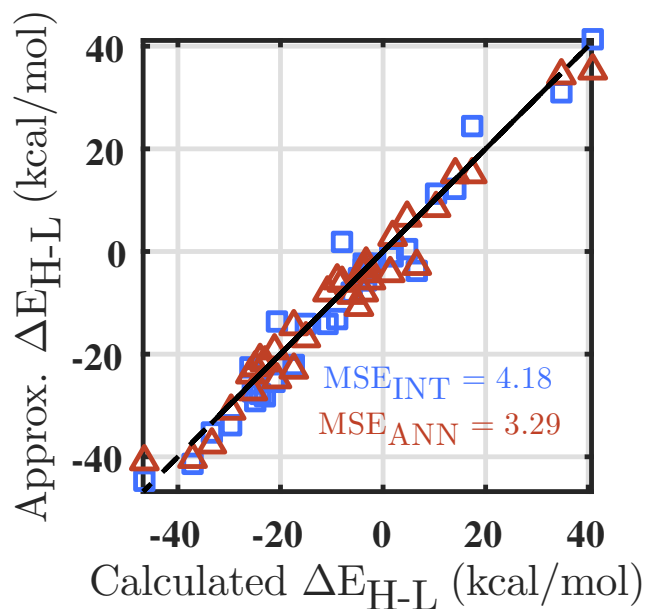

Figure S34: Parity plot comparing prediction of  $\Delta E_{\text{HS-LS}}$  in kcal/mol. The x-axis is the DFT value at  $a_{\text{HF}} = 0.20$ , while the y-axis is the predicted value. The blue squares are obtained by interpolating from the values at  $a_{\text{HF}} = 0.00$  using the predicted slopes. The red triangles are the matching test cases (where these were tested at  $a_{\text{HF}} = 0.20$ ).



Table S34: Predicted spin splitting energies in kcal/mol for CSD structures at  $a_{\text{HF}} = 0.20$  (B3LYP) interpolating data from  $a_{\text{HF}} = 0$  (GGA) using ANN-predicted HFX sensitivity, compared to data from DFT using B3LYP. The predictions and standard deviations of the ANN model are given in the second and third columns in kcal/mol $\cdot\text{HFX}^{-1}$ .

| Test | ANN $\frac{\partial E_{\text{H-L}}}{\partial a_{\text{HF}}}$ | ANN Std. Dev. | DFT, $a_{\text{HF}} = 0.00$ | Interpolated | DFT, $a_{\text{HF}} = 0.20$ | Error  |
|------|--------------------------------------------------------------|---------------|-----------------------------|--------------|-----------------------------|--------|
| 1    | -112                                                         | 16.31         | 36.54                       | 14.15        | 29.61                       | -15.46 |
| 2    | -113.6                                                       | 15.90         | 24.95                       | 2.22         | 14.18                       | -11.96 |
| 3    | -6.95                                                        | 14.38         | -22.58                      | -23.97       | -23.87                      | -0.10  |
| 4    | -90.68                                                       | 15.10         | 43.97                       | 25.83        | 34.05                       | -8.22  |
| 5    | -85.80                                                       | 15.01         | 43.98                       | 26.82        | 35.05                       | -8.23  |
| 6    | -21.31                                                       | 14.56         | -2.01                       | -6.27        | -11.49                      | 5.22   |
| 7    | -101.30                                                      | 14.58         | 37.01                       | 16.75        | 35.19                       | -18.44 |
| 8    | -126.30                                                      | 13.61         | 3.26                        | -21.99       | -16.41                      | -5.58  |
| 9    | -123.10                                                      | 14.90         | 20.23                       | -4.37        | 0.26                        | -4.63  |
| 11   | -52.19                                                       | 14.18         | -8.39                       | -18.83       | -15.21                      | -3.62  |
| 12   | -25.51                                                       | 14.53         | -17.82                      | -22.92       | -23.15                      | 0.23   |
| 13   | -59.05                                                       | 14.16         | -3.19                       | -15.00       | -16.74                      | 1.75   |
| 14   | -127.00                                                      | 15.08         | 57.46                       | 32.07        | 30.66                       | 1.41   |
| 15   | -48.81                                                       | 14.19         | -31.03                      | -40.80       | -45.11                      | 4.32   |
| 16   | -116.70                                                      | 14.13         | 70.10                       | 46.75        | 69.67                       | -22.92 |
| 17   | -95.78                                                       | 16.33         | 11.45                       | -7.70        | 3.51                        | -11.21 |
| 18   | -46.71                                                       | 13.99         | 5.40                        | -3.94        | -6.35                       | 2.41   |
| 19   | -64.62                                                       | 14.26         | 12.74                       | -0.18        | -3.14                       | 3.00   |
| 20   | -83.78                                                       | 13.97         | -3.82                       | -20.58       | -15.01                      | -5.56  |
| 21   | -90.32                                                       | 13.88         | 17.65                       | -0.42        | -1.69                       | 1.27   |
| 22   | -105.20                                                      | 13.67         | 11.70                       | -9.34        | -8.49                       | -0.85  |
| 23   | -80.10                                                       | 14.00         | 8.43                        | -7.59        | -5.36                       | -2.22  |
| 24   | -62.35                                                       | 13.85         | 15.41                       | 2.94         | 2.57                        | 0.37   |
| 25   | -72.41                                                       | 14.40         | 11.80                       | -2.69        | -0.23                       | -2.46  |
| 26   | -16.00                                                       | 14.40         | -21.00                      | -24.20       | -24.36                      | 0.15   |
| 27   | -115.50                                                      | 13.71         | 26.11                       | 3.01         | 3.59                        | -0.58  |
| 28   | -94.16                                                       | 14.69         | -12.56                      | -31.4        | -36.86                      | 5.46   |
| 29   | -57.17                                                       | 15.41         | -17.22                      | -28.65       | -23.90                      | -4.75  |
| 30   | -107.30                                                      | 13.88         | -13.39                      | -34.85       | -17.18                      | -17.67 |
| 31   | -79.92                                                       | 13.64         | -23.14                      | -39.12       | -38.34                      | -0.78  |
| 32   | -69.41                                                       | 14.77         | 2.12                        | -11.77       | -8.98                       | -2.79  |
| 33   | -25.51                                                       | 14.53         | -20.30                      | -25.40       | -23.41                      | -2.00  |
| 34   | -6.862                                                       | 14.24         | -19.72                      | -21.09       | -23.98                      | 2.89   |
| 35   | -34.22                                                       | 13.42         | -18.83                      | -25.68       | -22.43                      | -3.25  |

## References

- [1] A. A. Aruffo, B. D. Santarsiero, V. Schomaker, and E. C. Lingafelter. Bis(phenylmethanethiolato)(2,3,9,10-tetramethyl-1,4,8,11-tetraaza-1,3,8,10-cyclotetradecatetraene)iron(III) hexafluorophosphate, C<sub>28</sub>H<sub>38</sub>FeN<sub>4</sub>S<sub>2</sub>·PF<sub>6</sub>. *Acta Crystallogr., Sect. C Cryst. Struct. Commun.*, 40(10):1693–1695, 1984. ISSN 01082701. doi: 10.1107/S0108270184009185.
- [2] E Bang and O Monsted. *Acta Chem. Scand. A*, page 353, 1982.
- [3] AV Capilla, RA Aranda, and F Gomez-Beltran. *Cryst. Struct. Commun*, 9(147), 1980.
- [4] Iraklii I. Ebralidze, Gregory Leitus, Linda J.W. Shimon, Yong Wang, Sason Shaik, and Ronny Neumann. Structural Variability in Manganese(II) Complexes of N,N-bis(2-pyridinylmethylene) Ethane (and Propane) Diamine Ligands. *Inorg. Chim. Acta*, 362(13): 4713–4720, 2009. ISSN 00201693. doi: 10.1016/j.ica.2009.06.037.
- [5] G.N.Nadzhafov I.R.Amiraslanov K.S.Mamedov E.M.Movsumov F.N.Musaev. X-Raying Investigation into Complexes of n-Aminobenzoic Acid with Metals. *Zh. Strukt. Khim.*, 20: 1075, 1979.
- [6] Yarin Gal and Zoubin Ghahramani. Dropout as a Bayesian Approximation: Representing Model Uncertainty in Deep Learning. *arXiv:1506.02142*, 2015.
- [7] Burghard Grüning, Gerhard Holze, Titus A. Jenny, Petr Nesvadba, Albert Gossauer, Ludger Ernst, and William S. Sheldrick. Structure and Reactivity of Xanthocorrinoids. Part II. Influence of the c-Acetic-Acid Chain on the Course of the Hydroxylation of the Corrin Chromophore by Oxygen in the Presence of Ascorbic Acid. *Helv. Chim. Acta*, 68(6): 1754–1770, 1985. ISSN 0018019X. doi: 10.1002/hlca.19850680631.
- [8] Hong Hai, Hui Wang, Wen Ying Jin, Xiao Dong An, Wen Gang Huang, and Shu Hua Zhang. Synthesis, Crystal Structures, and Properties of Three Complexes of 5-(pyridin-2-ylmethoxy) Isophthalic Acid. *Synth. React. Inorg., Met.-Org., Nano-Met. Chem.*, 45(12): 1870–1874, 2015. ISSN 1553-3174. doi: 10.1080/15533174.2013.867882.
- [9] Katja Hansen, Grgoire Montavon, Franziska Biegler, Siamac Fazli, Matthias Rupp, Matthias Scheffler, O. Anatole von Lilienfeld, Alexandre Tkatchenko, and Klaus-Robert Müller. Assessment and validation of machine learning methods for predicting molecular atomization energies. *Journal of Chemical Theory and Computation*, 9(8):3404–3419, 2013. doi: 10.1021/ct400195d. PMID: 26584096.
- [10] Øyvind Hatlevik, Atta M. Arif, and Joel S. Miller. Synthesis and Characterization of Hexakis(acetonitrile)chromium(III) tetrafluoroborate, [CrIII(NCMe)<sub>6</sub>][BF<sub>4</sub>]<sub>3</sub>. A Nonaqueous CrIII Source. *J. Phys. Chem. Solids*, 65(1):61–63, 2004. ISSN 00223697. doi: 10.1016/j.jpcs.2003.08.020.
- [11] Timo Huxel, Sebastian Riedel, Jochen Lach, and Julia Klingele. Iron(II) and Nickel(II) Complexes of N-Alkylimidazoles and 1-Methyl-1H-1, 2, 4-Triazole: X-ray Studies, Magnetic Characterization, and DFT Calculations. *Z. anorg. allg. Chem*, 638(6):925–934, 2012. ISSN 00442313. doi: 10.1002/zaac.201200117.
- [12] Timo Huxel, Serhiy Demeshko, and Julia Klingele. 2-Amino-5-(2-pyridyl)-thiadiazole as Bidentate Ligand. *Z. anorg. allg. Chem.*, 641(10):1711–1717, 2015. ISSN 00442313. doi: 10.1002/zaac.201500144. URL <http://doi.wiley.com/10.1002/zaac.201500144>.

- [13] Efthymios I. Ioannidis, Terry Z. H. Gani, and Heather J. Kulik. molSimplify: A Toolkit for Automating Discovery in Inorganic Chemistry. *J. Comp. Chem.*, 37(22):2106–2117, 2016. ISSN 01928651. doi: 10.1002/jcc.24437.
- [14] Zofia Janas, Piotr Sobota, and Tadeusz Lis. Interaction Of Tin Chlorides With Iron, Chromium And Vanadium Chlorides In Tetrahydrofuran. Crystal Structures Of  $[\text{Fe}_2(-\text{Cl})_3(\text{thf})_6][\text{SnCl}_5(\text{thf})]$ ,  $[\text{Sn}_2(-\text{OH})_2\text{Cl}_6(\text{thf})_2]\cdot 2\text{thf}$  and  $\text{trans}-[\text{CrCl}_2(\text{thf})_4][\text{SnCl}_5(\text{thf})]$ . *J. Chem. Soc., Dalt. Trans.*, (9):2429–2434, 1991. ISSN 0300-9246. doi: 10.1039/DT9910002429.
- [15] Jan Janczak and Ryszard Kubiak. Stereochemistry And Properties Of The M(II)N(Py) Coordination Bond In The Low-Spin Dipyridinated Iron(II) And Cobalt(II) Phthalocyanines. *Inorg. Chim. Acta*, 342:64–76, 2003. ISSN 00201693. doi: 10.1016/S0020-1693(02)01060-5.
- [16] Qing-Qing Liang, Zheng-Yu Liu, En-Cui Yang, and Xiao-Jun Zhao. 1,2,4-Triazole Controlled Cd II /Mn II Complexes with Discrete Mononuclear, Polymeric 1D Chain, and 2D Layer Motifs. *Z. anorg. allg. Chem*, pages NA–NA, 2009. ISSN 00442313. doi: 10.1002/zaac.200900145.
- [17] Yan Liu, Duanjun Xu, and Jiagen Liu. Synthesis And Crystal Structure Of Tetraimidazole(Diaqua)-Manganese(II) Terephthalate. *J. Coord. Chem.*, 54(2):175–181, 2001. ISSN 0095-8972. doi: 10.1080/00958970108027153.
- [18] Zhen Ma, Manas Sutradhar, Atash V. Gurbanov, Abel M. Maharramov, Rafiga A. Aliyeva, Farqana S. Aliyeva, Fidan N. Bahmanova, Vusala I. Mardanova, Famil M. Chyragov, and Kamran T. Mahmudov. CoIII, NiIII and Uo2II Complexes with -Diketones and Their Arylhydrazones Derivatives: Synthesis, Structure and Catalytic Activity in Henry Reaction. *Polyhedron*, 101:14–22, 2015. ISSN 02775387. doi: 10.1016/j.poly.2015.07.054.
- [19] Anthony J. Markwell, John M. Pratt, M. Salim Shaikjee, and James G. Toerien. The Chemistry of Vitamin B12. Part 28. Crystal structure of Dicyanocobyrinic Acid Heptamethyl Ester and its Interaction with Alcohols: the Effects of Hydrogen Bonding to Coordinated Cyanide. *J. Chem. Soc., Dalt. Trans.*, (6):1349, 1987. ISSN 0300-9246. doi: 10.1039/dt9870001349.
- [20] Dana S. Marlin, Marilyn M. Olmstead, and Pradip K. Mascharak. Reaction of  $(\mu\text{-Oxo})\text{diiron(III)}$  Core with  $\text{CO}_2$  in N-Methylimidazole: Formation of Mono $(\mu\text{-carboxylato})(\mu\text{-oxo})\text{diiron(III)}$  Complexes with N-Methylimidazole as Ligands. *Inorg. Chem.*, 42(5):1681–1687, 2003. ISSN 0020-1669. doi: 10.1021/ic0206140. URL <http://pubs.acs.org/doi/abs/10.1021/ic0206140>.
- [21] Toshio Mashiko, Christopher A. Reed, Kenneth J. Haller, Margaret E. Kastner, and W. Robert Scheidt. Thioether Ligation in Iron-Porphyrin Complexes: Models for Cytochrome C. *J. Am. Chem. Soc.*, 103(19):5758–5767, 1981. ISSN 0002-7863. doi: 10.1021/ja00409a024.
- [22] Grégoire Montavon, Matthias Rupp, Vivekanand Gobre, Alvaro Vazquez-Mayagoitia, Katja Hansen, Alexandre Tkatchenko, Klaus-Robert Müller, and O Anatole von Lilienfeld. Machine learning of molecular electronic properties in chemical compound space. *New Journal of Physics*, 15(9):095003, 2013. URL <http://stacks.iop.org/1367-2630/15/i=9/a=095003>.
- [23] Susanne Mossin, Henning Osholm Sørensen, and Høgni Weihe. Trans-bis(cyano- $\kappa\text{C}$ )(1,4,8,11-tetraazacyclotetradecane- $\kappa\text{4N}$ )manganese(III) Perchlorate, a Low-Spin Manganese(III) Complex. *Acta Crystallogr., Sect. C Cryst. Struct. Commun.*, 58(4):m204–m206, 2002. ISSN 0108-2701. doi: 10.1107/S0108270102001713.

- [24] Susanne Mossin, Henning Osholm Sørensen, Høgni Weihe, Jørgen Glerup, and Inger Søtofte. Manganese (III) Cyclam Complexes with Aqua, Iodo, Nitrito, Perchlorato and Acetic Acid/acetato Axial Ligands. *Inorg. Chim. Acta*, 358(4):1096–1106, 2005. ISSN 00201693. doi: 10.1016/j.ica.2004.10.005.
- [25] B. Moubaraki, M. Ley, D. Benlian, and J. P. Sorbier. Structure and Single-Crystal Conductivity Measurements of Oxidized 3D Metal Phthalocyanines. Bis-Chloro Derivatives of Chromium(III), Iron(III) and Cobalt(III). *Acta Crystallogr., Sect. C Cryst. Struct. Commun.*, 46(3):379–385, 1990. ISSN 01082701. doi: 10.1107/S0108270189007092.
- [26] Emmanuel N. Nfor, Peter F. Asobo, Justin Nenwa, Oswald N. Nfor, Julius N. Njapba, Romanus N. Njong, and Offiong E. Offiong. Nickel (II) and Iron (II) Complexes with Azole Derivatives: Synthesis, Crystal Structures and Antifungal Activities. *Int. J. Inorg. Chem.*, 2013:1–6, 2013. ISSN 2090-2026. doi: 10.1155/2013/987574.
- [27] Junichi Nishijo and Masaya Enomoto. Synthesis, Structure And Magnetic Properties Of [Crcyclam(Cc-6-Methoxynaphthalene)2](Tcnq)N(1,2-Dichloroethane) (N=1, 2). *Inorg. Chim. Acta*, 437:59–63, 2015. ISSN 00201693. doi: 10.1016/j.ica.2015.08.007.
- [28] Junichi Nishijo, Ken Judai, Shigenori Numao, and Nobuyuki Nishi. Chromium Acetylde Complex Based Ferrimagnet and Weak Ferromagnet. *Inorg. Chem.*, 48(19):9402–9408, 2009. ISSN 0020-1669. doi: 10.1021/ic901295d.
- [29] Yukiko Oba and Tomoyuki Mochida. Thermal Properties And Crystal Structures Of Cobalt(III)Cyclam Complexes With The Bis(Trifluoromethanesulfonyl)Amide Anion (Cyclam=1,4,8,11-Tetraazacyclotetradecane). *Polyhedron*, 99:275–279, 2015. ISSN 02775387. doi: 10.1016/j.poly.2015.08.015.
- [30] Ranjan Patra, Arvind Chaudhary, Sudip Kumar Ghosh, and Sankar Prasad Rath. Modulation of Metal Displacements in a Saddle Distorted Macrocyclic: Synthesis, Structure, and Properties of High-Spin Fe(III) Porphyrins and Implications for the Hemoproteins. *Inorg. Chem.*, 47(18):8324–8335, 2008. ISSN 0020-1669. doi: 10.1021/ic800944q.
- [31] C.E. Pfluger and P.S. Haradem. Coordination Sphere Geometry Of Tris(Acetylacetonato)Metal(II) Complexes: The Crystal And Molecular Structure Of Tris(1,1,1,5,5,5-Hexafluoroacetylacetonato)Iron(III). *Inorg. Chim. Acta*, 69:141–146, 1983. ISSN 00201693. doi: 10.1016/S0020-1693(00)83564-1.
- [32] Raghunathan Ramakrishnan, Pavlo O. Dral, Matthias Rupp, and O. Anatole von Lilienfeld. Big data meets quantum chemistry approximations: The -machine learning approach. *Journal of Chemical Theory and Computation*, 11(5):2087–2096, 2015. doi: 10.1021/acs.jctc.5b00099. PMID: 26574412.
- [33] Hiroshi Sakiyama, Ryoji Mitsuhashi, and Masahiro Mikuriya. Pseudo-S6 Complex Cations of a Hexakis-N-methylformamide Nickel(II) Complex. *X-Ray Struct. Anal. Online*, 31:45–46, 2015. ISSN 1883-3578. doi: 10.2116/xraystruct.31.45.
- [34] Fatima Setifi, Akira Ota, Lahcène Ouahab, Stéphane Golhen, Hideki Yamochi, and Gunzi Saito. Charge Transfer Salts of BO with Paramagnetic Isothiocyanato Complex Anions: (BO)[M(isoq)<sub>2</sub>(NCS)<sub>4</sub>]; M=CrIII or FeIII, isoq=isoquinoline and BO=Bis(ethylenedioxy)tetrathiafulvalene. *J. Solid State Chem.*, 168(2):450–456, 2002. ISSN 00224596. doi: 10.1006/jssc.2002.9728. URL <http://linkinghub.elsevier.com/retrieve/pii/S0022459602997288>.
- [35] Y.A. Simonov, A.A. Dvorkin, I.I. Bulgak, M.P. Starish, and D.G. Batir. . *Koord. Khim.*, 5: 1883, 1979.

- [36] Thi My Uyen Ton, Ciputra Tejo, Stefani Tania, Joyce Wei Wei Chang, and Philip Wai Hong Chan. Iron(II)-Catalyzed Amidation of Aldehydes with Iminoiodinanes at Room Temperature and under Microwave-Assisted Conditions. *J. Org. Chem.*, 76(12):4894–4904, 2011. ISSN 0022-3263. doi: 10.1021/jo200284a.
- [37] Yi-Long Yan, Melissa T. Miller, Yuchen Cao, and Seth M. Cohen. Synthesis of Hydroxypyrrone- and Hydroxythiopyrrone-Based Matrix Metalloproteinase Inhibitors: Developing a StructureActivity Relationship. *Bioorg. Med. Chem. Lett.*, 19(7):1970–1976, 2009. ISSN 0960894X. doi: 10.1016/j.bmcl.2009.02.044.
- [38] Hai-Yan Zhao, Jing-Jun Ma, Xiao-Dong Yang, and Min-Li Yang. Synthesis, Crystal Structure, and Antibacterial Activity of a New Cobalt(II) Complex Containing Imidazole as Ligand. *Synth. React. Inorg., Met.-Org., Nano-Met. Chem.*, 46(1):45–50, 2016. ISSN 1553-3174. doi: 10.1080/15533174.2014.900633.
- [39] Xin-Hua Zhao, Shao-Liang Zhang, Dong Shao, and Xin-Yi Wang. Spin Crossover in [Fe(2-Picolylamine) 3 ] 2+ Adjusted by Organosulfonate Anions. *Inorg. Chem.*, 54(16):7857–7867, 2015. ISSN 0020-1669. doi: 10.1021/acs.inorgchem.5b00870.
